# Supplementary material for: Organic photoredox-catalyzed unimolecular PCET of benzylic alcohols
Source: Royal Society of Chemistry journal article supplement (doi:10.1039/d4sc07048h), 2025-01-01
Supplement: d4sc07048h1.pdf [file d4sc07048h1.pdf]

## Organic Photoredox-Catalyzed Unimolecular PCET of Benzylic Alcohols

Tomotoki Matsuo,<sup>1</sup> Masaki Sano,<sup>2</sup> Yuto Sumida,<sup>3\*</sup> and Hirohisa Ohmiya<sup>1\*</sup>

<sup>1</sup> Institute for Chemical Research, Kyoto University, Gokasho, Uji, Kyoto 611-0011, Japan

<sup>2</sup> Division of Pharmaceutical Sciences, Graduate School of Medical Sciences, Kanazawa University,  
Kakuma-machi, Kanazawa 920-1192, Japan

<sup>3</sup> Chemical Bioscience Team, Laboratory for Biomaterials and Bioengineering, Institute of  
Integrated Research, Institute of Science Tokyo, Tokyo, Japan.

\*E-mail: Yuto Sumida : sumida.yuto@tmd.ac.jp

Hirohisa Ohmiya: ohmiya@scl.kyoto-u.ac.jp

### Table of Contents

#### ■ Supplementary Methods ■

|                                                                      |     |
|----------------------------------------------------------------------|-----|
| 1. Instrumentation and Chemicals                                     |     |
| 2. Synthesis of Photocatalysts <b>PC4</b> , <b>PC6</b> , <b>PC12</b> | S3  |
| 3. Characterization Data for Photocatalysts                          | S4  |
| 4. Characterization Data for Substrates                              | S7  |
| 5. Optimization for $\beta$ -Scission (HAT)                          | S18 |
| 6. Procedure for $\beta$ -Scission (HAT)                             | S20 |
| 7. Characterization Data for Products of $\beta$ -Scission (HAT)     | S20 |
| 8. Optimization for Giese Addition                                   | S25 |
| 9. Procedure for Giese Addition                                      | S26 |
| 10. Characterization Data for Products of Giese Addition             | S26 |
| 11. Minisci-type Reaction                                            | S32 |
| 12. Procedure for Additive Effect                                    | S33 |
| 13. UV/Vis Spectra of Photocatalysts                                 | S34 |
| 14. Fluorescence Spectra of Photocatalysts                           | S39 |
| 15. Cyclic Voltammetry (CV) of Photocatalysts                        | S44 |
| 16. Summary of Redox Properties of Organophotocatalysts              | S48 |
| 17. X-ray Diffraction Analysis for <b>PC6</b>                        | S49 |
| 18. Procedure for Radical Trap Experiment                            | S50 |
| 19. Stern–Volmer Experiment                                          | S50 |
| 20. EDA Complex                                                      | S51 |
| 21. Computational Studies                                            | S52 |

|                              |     |
|------------------------------|-----|
| ■ Supplementary References ■ | S77 |
|------------------------------|-----|

|                 |     |
|-----------------|-----|
| ■ NMR Spectra ■ | S78 |
|-----------------|-----|

## ■ Supplementary Methods ■

### 1. Instrumentation and Chemicals

**NMR spectra** were recorded on a Bruker AVANCE NEO 400N spectrometer, operating at 400 MHz for  $^1\text{H}$  NMR, 100.6 MHz for  $^{13}\text{C}$  NMR, 376.5 MHz for  $^{19}\text{F}$  NMR. Chloroform- $d_1$  ( $\text{CDCl}_3$ ) containing 0.03% tetramethylsilane (TMS) (>99.8%D, Cambridge Isotope Laboratories, Inc., Cat. No. DLM-7) were used as solvents for NMR measurements at ambient temperature. Chemical shifts ( $\delta$ ) for  $^1\text{H}$  NMR are given in parts per million (ppm) relative to TMS ( $\delta$  0.00 ppm in  $\text{CDCl}_3$ ). Chemical shifts ( $\delta$ ) for  $^{13}\text{C}$  NMR are given in ppm relative to  $\text{CDCl}_3$  ( $\delta$  77.0 ppm). Chemical shifts were reported in  $\delta$  ppm. The abbreviations s, d, t, q, quin, and m signify singlet, doublet, triplet, quartet, quintet and multiplet, respectively.

**Mass spectra** were obtained with a Bruker timsTOF mass spectrometer (ESI).

**TLC analyses** were performed on commercial glass plates of Merck Silica gel 60F<sub>254</sub>. Silica gel (Wakosil<sup>®</sup> 60, 64~210  $\mu\text{m}$ ) was used for column chromatography.

**Biotage Selekt<sup>®</sup>**, **Biotage Isolera One<sup>®</sup>** and **LaboACE LC-5060** (for Gel Permeation Chromatography) and were used for purification.

**IR spectra** were measured with an ATR Accessory (QATR-S) for the Shimadzu IRSpirit FT-IR Spectrometer.

**Melting points** were measured on a Stanford Research Systems MPA100.

**UV-Vis absorption spectra** were recorded on a Shimadzu UV-1900.

**Fluorescence spectra** were recorded on a Shimadzu RF-6000.

**Cyclic voltammetry measurements** were recorded with a Hokuto Denko HZ-7000 potentiostat.

**Single-crystal X-ray diffraction data** were collected on a Bruker Single Crystal CCD X-ray Diffractometer (SMART APEX II).

**Reaction set-up and materials:** Kessil PR-160 390 nm (max 52W) was used as a light source. TEKNOS MG9 was used as a fan.

All reactions were carried out under nitrogen atmosphere. Materials were obtained from commercial suppliers or prepared according to standard procedures unless otherwise noted. Before reactions, ethyl acrylate was passed through a short pad of Aluminium oxide 60. **PC1**, **PC3** and **PC10** were purchased from Tokyo Chemical Industry Co., stored under nitrogen, and used as received. **PC2** and **PC7** were purchased from BLD Pharmatech Ltd., stored under nitrogen, and used as received. **PC8** and **PC11** were purchased from Merck Sigma–Aldrich Japan Inc., stored under nitrogen, and used as received. **PC5** was prepared by the reported procedure.<sup>1</sup> TRIP thiol was prepared by the reported procedure.<sup>2</sup> 1-Dodecanthiol and Benzenethiol were purchased from Tokyo Chemical Industry Co., stored under nitrogen, and used as received. Triisopropylsilanethiol was purchased from Merck Sigma–Aldrich Japan Inc., stored under nitrogen, and used as received. Dichloromethane (super dehydrated), acetonitrile (super dehydrated), tetrahydrofuran (super dehydrated, stabilizer free), diethyl ether (super dehydrated) and methanol (super special grade) were purchased from Fujifilm Wako Pure Chemical Co., stored under nitrogen, and used as received.

## 2. Synthesis of Photocatalysts PC4, PC6, PC12

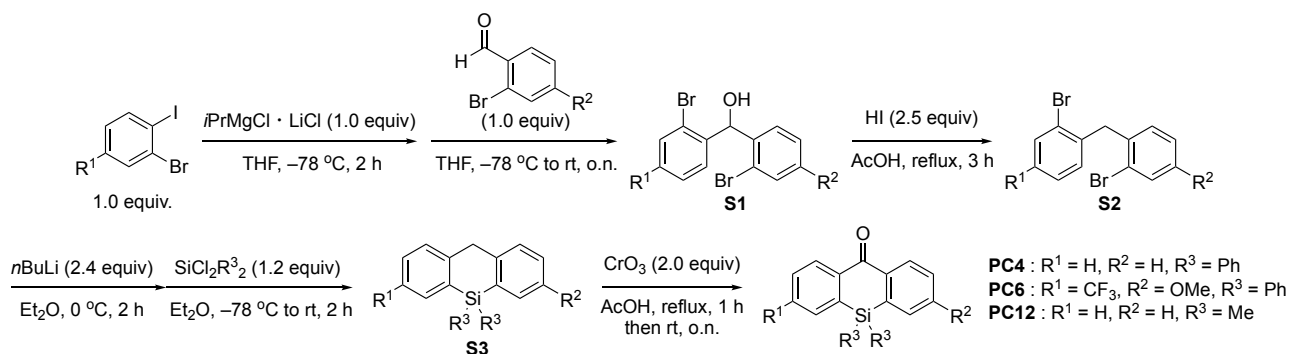

**Figure S1.** Synthesis of Photocatalysts

**Synthesis of PC4 as a representative (Figure S1)** To a solution of aryl iodide (626  $\mu\text{L}$ , 5.0 mmol) in dry THF (33.3 mL),  $i\text{PrMgCl} \cdot \text{LiCl}$  (1.3 M in THF) (3.85 mL, 5 mmol) was added dropwise at  $-78\text{ }^\circ\text{C}$ . The reaction mixture was stirred for 2 h at  $-78\text{ }^\circ\text{C}$  under a nitrogen atmosphere. In a separate round-bottom flask, THF (6.8 mL) and aldehyde (578  $\mu\text{L}$ , 5.0 mmol) were added, the temperature was cooled to  $-78\text{ }^\circ\text{C}$ , and the prepared Grignard solution was added dropwise. The reaction mixture was stirred for over night at room temperature under a nitrogen atmosphere. The mixture was quenched with  $\text{NH}_4\text{Cl}$  aq. and extracted with  $\text{Et}_2\text{O}$  three times. The organic layer was dried over sodium sulfate and filtered. The crude material was concentrated under reduced pressure. After volatiles were removed, flash column chromatography on silica gel (Biotage Selekt, 100:0–84:16, hexane/ $\text{EtOAc}$ ) gave **S1**<sub>PC4</sub> or **S1**<sub>PC12</sub> (1.46 g, 4.27 mmol, 85%) as a white solid.

To a solution of **S1**<sub>PC4</sub> and **S1**<sub>PC12</sub> (1.46 g, 4.27 mmol) in AcOH (13.8 mL), HI (57 wt% in water) (1.36 mL, 2.42 mmol) was added. The reaction mixture was stirred for 3 h at reflux under a nitrogen atmosphere. The mixture was quenched with  $\text{Na}_2\text{SO}_3$  aq. and extracted with AcOEt three times. The organic layer was washed with KOH, dried over sodium sulfate, and filtered. The crude material was concentrated under reduced pressure. After volatiles were removed, flash column chromatography on silica gel (Biotage Selekt, hexane only) gave **S2**<sub>PC4</sub> and **S2**<sub>PC12</sub> (1.23 g, 3.79 mmol, 89%) as a red oil.

To a solution of **S2**<sub>PC4</sub> (2.19 g, 6.7 mmol) in dry  $\text{Et}_2\text{O}$  (27 mL),  $n\text{BuLi}$  (1.56 M in hexane) (10.3 mL, 16.1 mmol) was added dropwise at  $0\text{ }^\circ\text{C}$ . The reaction mixture was stirred for 2 h at  $0\text{ }^\circ\text{C}$  under a nitrogen atmosphere, and then cooled to  $-78\text{ }^\circ\text{C}$ . In a separate round-bottom flask,  $\text{Ph}_2\text{SiCl}_2$  (1.66 mL, 8.0 mmol) was added, the temperature was cooled to  $-78\text{ }^\circ\text{C}$ , and the aryl lithium solution was added dropwise. The reaction mixture was stirred for 2 h at room temperature under a nitrogen atmosphere. The mixture was quenched with  $\text{NH}_4\text{Cl}$  aq. and extracted with  $\text{Et}_2\text{O}$  three times. The organic layer was dried over sodium sulfate and filtered. The crude material was concentrated under reduced pressure. After volatiles were removed, the resulting solid was washed with hexane and water. Slightly impure **S3**<sub>PC4</sub> (1.58 g, 4.82 mmol, 72%) was obtained and used in the next reaction without further purification.

To a solution of **S3**<sub>PC4</sub> (360.5 mg, 1.1 mmol) in AcOH (3.7 mL),  $\text{CrO}_3$  (220.0 mg, 2.2 mmol) was added. The reaction mixture was stirred for 15 min at room temperature, then refluxed for 1 h, and finally stirred overnight at room temperature under a nitrogen atmosphere. The mixture was quenched with ice water and extracted with  $\text{Et}_2\text{O}$  three times. The organic layer was dried over sodium sulfate

and filtered. The crude material was concentrated under reduced pressure. The resulting solid was passed through a silica gel short-path column with  $\text{CH}_2\text{Cl}_2$  to give **PC4** (332.3 mg, 0.92 mmol, 83%) as a white solid.

### 3. Characterization Data for Photocatalysts

#### Bis(2-bromophenyl)methanol (**S1<sub>PC4</sub>** and **S1<sub>PC12</sub>**)

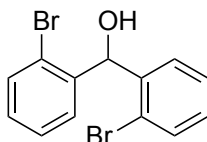

$^1\text{H NMR}$  (400 MHz,  $\text{CDCl}_3$ )  $\delta$  7.59–7.57 (m, 2H), 7.35–7.29 (m, 4H), 7.19 (ddd,  $J = 8.0, 6.4, 2.4$  Hz, 2H), 6.42 (d,  $J = 4.0$  Hz, 1H), 2.55 (dd,  $J = 4.0, 3.2$  Hz, 1H).

$^{13}\text{C NMR}$  (100.6 MHz,  $\text{CDCl}_3$ )  $\delta$  140.9 (2C), 132.9 (2C), 129.4 (2C), 128.6 (2C), 127.6 (2C), 123.8 (2C), 74.2.

The  $^1\text{H}$  and  $^{13}\text{C}$  NMR spectra data of **S1<sub>PC4</sub>** and **S1<sub>PC12</sub>** were consistent with the literature.<sup>3</sup>

#### Bis(2-bromophenyl)methane (**S2<sub>PC4</sub>** and **S2<sub>PC12</sub>**)

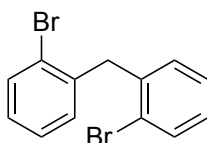

$^1\text{H NMR}$  (400 MHz,  $\text{CDCl}_3$ )  $\delta$  7.60 (dd,  $J = 8.0, 1.2$  Hz, 2H), 7.22 (ddd  $J = 7.6, 7.6, 1.2$  Hz, 2H), 7.11 (ddd,  $J = 8.0, 7.6, 1.6$  Hz, 2H), 6.99 (dd,  $J = 7.6, 1.6$  Hz, 2H) 4.21 (s, 2H).

$^{13}\text{C NMR}$  (100.6 MHz,  $\text{CDCl}_3$ )  $\delta$  138.9 (2C), 132.8 (2C), 130.7 (2C), 128.1 (2C), 127.5 (2C), 125.1 (2C), 42.1.

The  $^1\text{H}$  and  $^{13}\text{C}$  NMR spectra data of **S2<sub>PC4</sub>** and **S2<sub>PC12</sub>** were consistent with the literature.<sup>3</sup>

#### 5,5-Diphenyldibenzo[*b,e*]silin-10(5*H*)-one (**PC4**)

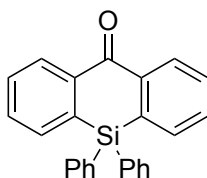

**M.p.** 190–195 °C.

**IR** (neat) 1649, 1581, 1428, 1284, 1232, 1132, 1110, 924, 745, 728  $\text{cm}^{-1}$ .

$^1\text{H NMR}$  (400 MHz,  $\text{CDCl}_3$ )  $\delta$  8.48–8.46 (m, 2H), 7.72–7.69 (m, 2H), 7.64–7.59 (m, 3H), 7.57–7.54 (m, 5H), 7.45–7.41 (m, 2H), 7.37–7.33 (m, 4H).

$^{13}\text{C NMR}$  (100.6 MHz,  $\text{CDCl}_3$ )  $\delta$  188.1, 141.9 (2C), 136.0 (4C), 135.6 (2C), 135.0 (2C), 132.8 (2C), 131.9 (2C), 130.5 (2C), 130.2 (2C), 129.7 (2C), 128.2 (4C).

**HRMS–ESI** (m/z):  $[M+H]^+$  calcd for  $C_{25}H_{19}OSi^+$ , 363.1200; found, 363.1210.

### 5,5-Dimethyl-5,10-dihydrodibenzo[*b,e*]siline (**S3**<sub>PC12</sub>)

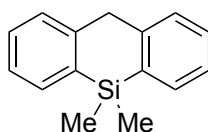

The reaction was carried out in 2.0 mmol scale. The product was purified by flash chromatography on silica gel (Biotage Selekt, hexane only) to afford **S3**<sub>PC12</sub> (300.0 mg, 1.34 mmol, 67%) as a colorless oil.

**<sup>1</sup>H NMR** (400 MHz,  $CDCl_3$ )  $\delta$  7.61–7.59 (m, 2H), 7.33–7.31 (m, 4H), 7.29–7.24 (m, 2H), 4.11 (s, 2H), 0.47 (s, 6H).

**<sup>13</sup>C NMR** (100.6 MHz,  $CDCl_3$ )  $\delta$  145.9 (2C), 135.7 (2C), 133.0 (2C), 129.0 (2C), 127.9 (2C), 125.6 (2C), 41.5, –3.1 (2C).

The <sup>1</sup>H and <sup>13</sup>C NMR spectra data of **S3**<sub>PC12</sub> were consistent with the literature.<sup>4</sup>

### 5,5-Dimethyldibenzo[*b,e*]silin-10(5*H*)-one (**PC12**)

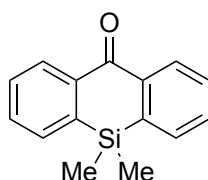

The reaction was carried out in 1.0 mmol scale. The product was purified by flash chromatography on silica gel (Biotage Selekt, 98:2–90:10, hexane/ $CH_2Cl_2$ ) to afford **PC12** (201.2 mg, 0.84 mmol, 84%) as a white solid.

**M.p.** 77–82 °C.

**IR** (neat) 1652, 1583, 1564, 1284, 1232, 1133, 925, 842, 812, 733  $cm^{-1}$ .

**<sup>1</sup>H NMR** (400 MHz,  $CDCl_3$ )  $\delta$  8.44–8.41 (m, 2H), 7.70–7.68 (m, 2H), 7.62–7.56 (m, 4H), 0.50 (s, 6H).

**<sup>13</sup>C NMR** (100.6 MHz,  $CDCl_3$ )  $\delta$  188.1, 140.9 (2C), 139.0 (2C), 133.2 (2C), 131.7 (2C), 130.0 (2C), 129.6 (2C), –1.5 (2C).

**HRMS–ESI** (m/z):  $[M+H]^+$  calcd for  $C_{15}H_{15}OSi^+$ , 239.0887; found, 239.0887.

### (2-Bromo-4-(trifluoromethyl)phenyl)(2-bromo-4-methoxyphenyl)methanol (**S1**<sub>PC6</sub>)

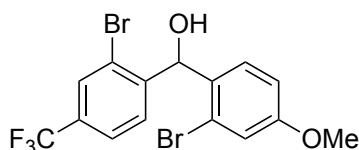

The reaction was carried out in 10.0 mmol scale. The product **S1**<sub>PC6</sub> was purified by flash chromatography on silica gel (Biotage Selekt, 97:3–87:13, hexane/EtOAc) to afford **S1**<sub>PC6</sub> (4.29 g, 9.75 mmol, 97%) as a pale-yellow oil.

**IR** (neat) 3269, 1602, 1489, 1319, 1231, 1169, 1123, 1079, 1030, 839  $\text{cm}^{-1}$ .

**$^1\text{H}$  NMR** (400 MHz,  $\text{CDCl}_3$ )  $\delta$  7.82 (d,  $J = 0.8$  Hz, 1H), 7.68 (d,  $J = 8.0$  Hz, 1H), 7.62 (dd,  $J = 8.0$ , 0.8 Hz, 1H), 7.16 (d,  $J = 2.4$  Hz, 1H), 6.99 (d,  $J = 8.8$  Hz, 1H), 6.81 (dd,  $J = 8.8$ , 2.4 Hz, 1H), 6.36 (d,  $J = 4.0$  Hz, 1H), 3.80 (s, 3H), 2.55 (m, 1H).

**$^{13}\text{C}$  NMR** (100.6 MHz,  $\text{CDCl}_3$ )  $\delta$  159.9, 145.3, 132.3, 131.3 (q,  $J = 33.1$  Hz), 129.8 (q,  $J = 3.8$  Hz), 129.2, 128.9, 124.6, 124.3 (q,  $J = 3.8$  Hz), 123.4, 123.1 (q,  $J = 272.7$  Hz), 118.4, 113.6, 73.6, 55.6.

**$^{19}\text{F}$  NMR** (376.5 MHz,  $\text{CDCl}_3$ )  $\delta$  -62.6.

**HRMS-ESI** ( $m/z$ ):  $[\text{M}+\text{NH}_4]^+$  calcd for  $\text{C}_{15}\text{H}_{15}\text{NBr}_2\text{F}_3\text{O}_2^+$ , 457.9396; found, 457.9384.

## 2-Bromo-1-(2-bromo-4-(trifluoromethyl)benzyl)-4-methoxybenzene (**S2<sub>PC6</sub>**)

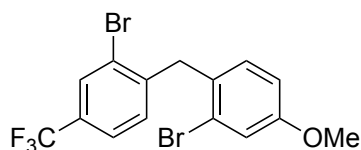

The reaction was carried out in 9.67 mmol scale. The product was purified by flash chromatography on silica gel (Biotage Selekt, 100:0–95:5, hexane/EtOAc) to afford **S1<sub>PC6</sub>** (3.04 g, 7.17 mmol, 74%) as a colorless oil.

**IR** (neat) 1604, 1567, 1489, 1393, 1317, 1238, 1169, 1122, 1077, 1036  $\text{cm}^{-1}$ .

**$^1\text{H}$  NMR** (400 MHz,  $\text{CDCl}_3$ )  $\delta$  7.85 (d,  $J = 0.8$  Hz, 1H), 7.45 (dd,  $J = 8.0$ , 0.8 Hz, 1H), 7.18 (d,  $J = 2.8$  Hz, 1H), 7.02 (d,  $J = 8.0$  Hz, 1H), 6.95 (d,  $J = 8.4$  Hz, 1H), 6.81 (dd,  $J = 8.4$ , 2.4 Hz, 1H), 4.17 (s, 2H), 3.80 (s, 3H).

**$^{13}\text{C}$  NMR** (100.6 MHz,  $\text{CDCl}_3$ )  $\delta$  159.0, 145.6, 131.3, 130.5, 130.2 (q,  $J = 32.9$  Hz), 129.67, 129.65 (q,  $J = 3.8$  Hz), 125.2, 124.9, 124.6, 124.2 (q,  $J = 3.8$  Hz), 123.2 (q,  $J = 272.5$  Hz), 118.2, 55.5, 41.2.

**$^{19}\text{F}$  NMR** (376.5 MHz,  $\text{CDCl}_3$ )  $\delta$  -62.5.

**HRMS-ESI** ( $m/z$ ):  $[\text{M}+\text{H}]^+$  calcd for  $\text{C}_{15}\text{H}_{12}\text{Br}_2\text{F}_3\text{O}^+$ , 424.9182; found, 424.9197.

## 3-Methoxy-5,5-diphenyl-7-(trifluoromethyl)-5,10-dihydrodibenzo[*b,e*]siline (**S3<sub>PC6</sub>**)

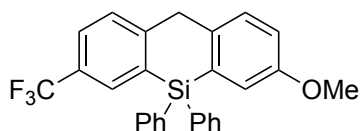

To a solution of **S2<sub>PC6</sub>** (1.11 g, 2.6 mmol) in dry  $\text{Et}_2\text{O}$  (10.4 mL),  $n\text{BuLi}$  (1.51 M in hexane) (4.13 mL, 6.24 mmol) was added dropwise at 0 °C. The reaction mixture was stirred for 2 h at 0 °C under a nitrogen atmosphere, and then cooled to -78 °C. In a separate round-bottom flask,  $\text{Ph}_2\text{SiCl}_2$  (601.5  $\mu\text{L}$ , 3.12 mmol) was added, the temperature was cooled to -78°C, and the aryl lithium solution was added dropwise. The reaction mixture was stirred for 2 h at room temperature under a nitrogen atmosphere. The mixture was quenched with  $\text{NH}_4\text{Cl}$  aq. and extracted with  $\text{Et}_2\text{O}$  three times. The organic layer was dried over sodium sulfate and filtered. The crude material was concentrated under reduced pressure. After volatiles were removed, filtered using Kiriya funnel through hexane:  $\text{Et}_2\text{O}$  (9:1) and obtain the filtrate. The filtrate was concentrated under reduced pressure. After volatiles were

removed, flash column chromatography on silica gel (Biotage Selekt, 100:0–90:10, hexane/CH<sub>2</sub>Cl<sub>2</sub>) gave **S3<sub>PC6</sub>** (801.3 mg, 1.79 mmol, 69%) as a colorless oil.

**IR** (neat) 1606, 1560, 1484, 1429, 1324, 1252, 1168, 1120, 1080, 1036 cm<sup>-1</sup>.

**<sup>1</sup>H NMR** (400 MHz, CDCl<sub>3</sub>) δ 7.72 (s, 1H), 7.60 (dd, *J* = 8.0, 1.6 Hz, 1H), 7.50–7.43 (m, 7H), 7.39–7.35 (m, 4H), 7.31 (d, *J* = 8.4 Hz, 1H), 7.03 (d, *J* = 2.8 Hz, 1H), 6.92 (dd, *J* = 8.4, 2.8 Hz, 1H), 4.02 (s, 2H), 3.74 (s, 3H).

**<sup>13</sup>C NMR** (100.6 MHz, CDCl<sub>3</sub>) δ 157.8, 151.1, 137.7, 136.1 (4C), 135.0 (q, *J* = 26.2 Hz), 134.2, 133.4, 131.7, 131.3 (q, *J* = 3.6 Hz), 130.2 (2C), 129.1, 128.1 (4C), 127.8, 126.3 (q, *J* = 3.6 Hz), 124.4 (q, *J* = 272.5 Hz), 120.5 (2C), 114.9, 55.3, 40.6.

**<sup>19</sup>F NMR** (376.5 MHz, CDCl<sub>3</sub>) δ -62.1.

**HRMS–ESI** (*m/z*): [M+H]<sup>+</sup> calcd for C<sub>27</sub>H<sub>22</sub>F<sub>3</sub>OSi<sup>+</sup>, 447.1387; found, 447.1389.

### 3-Methoxy-5,5-diphenyl-7-(trifluoromethyl)dibenzo[*b,e*]silin-10(5*H*)-one (PC6)

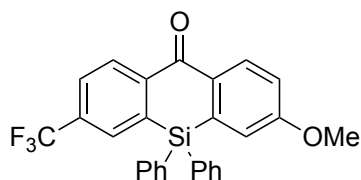

The reaction was carried out in 1.79 mmol scale. The product was purified by flash chromatography on silica gel (Biotage Selekt, 97:3–80:20, hexane/CH<sub>2</sub>Cl<sub>2</sub>) to afford **PC6** (667.5 mg, 1.45 mmol, 81%) as a white solid.

**M.p.** 167–172°C.

**IR** (neat) 1647, 1586, 1429, 1327, 1270, 1247, 1133, 1084, 928, 865 cm<sup>-1</sup>.

**<sup>1</sup>H NMR** (400 MHz, CDCl<sub>3</sub>) δ 8.59 (d, *J* = 8.4 Hz, 1H), 8.49 (m, 1H), 7.90 (m, 1H), 7.84 (ddd, *J* = 8.4, 2.0, 0.4 Hz, 1H), 7.56–7.53 (m, 4H), 7.49–7.44 (m, 2H), 7.40–7.36 (m, 4H), 7.15–7.11 (m, 2H), 3.84 (s, 3H).

**<sup>13</sup>C NMR** (100.6 MHz, CDCl<sub>3</sub>) δ 185.7, 162.5, 144.6, 137.8, 136.7, 135.9 (4C), 134.3, 133.0, 132.8 (q, *J* = 32.4 Hz), 131.7, 131.4 (q, *J* = 3.6 Hz), 130.6 (2C), 130.1, 128.4 (4C), 127.2 (q, *J* = 3.6 Hz), 123.8 (q, *J* = 272.4 Hz), 119.8 (2C), 116.2, 55.4.

**<sup>19</sup>F NMR** (376.5 MHz, CDCl<sub>3</sub>) δ -63.0.

**HRMS–ESI** (*m/z*): [M+H]<sup>+</sup> calcd for C<sub>27</sub>H<sub>20</sub>F<sub>3</sub>O<sub>2</sub>Si<sup>+</sup>, 461.1179; found, 461.1171.

## 4. Characterization Data for Substrates

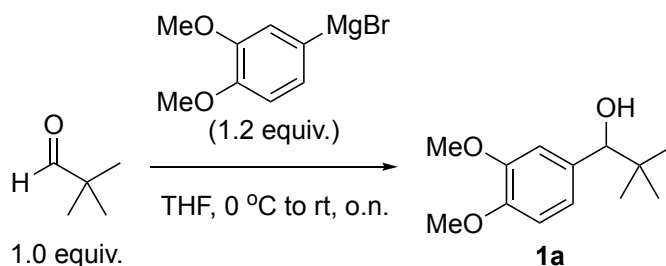

**Figure S2.** Synthesis of **1a**





### 1-(3,4-Dimethoxyphenyl)-2-phenoxyethan-1-ol (**1h**)

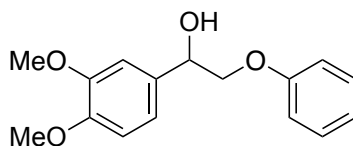

**<sup>1</sup>H NMR** (400 MHz, CDCl<sub>3</sub>) δ 7.32–7.27 (m, 2H), 7.02 (d, *J* = 2.0 Hz, 1H), 7.00–6.96 (m, 2H), 6.95–6.91 (m, 2H), 6.88 (d, *J* = 8.4 Hz, 1H), 5.08 (dt, *J* = 8.8, 2.8 Hz, 1H), 4.09 (dd, *J* = 9.2, 3.2 Hz, 1H), 4.01 (t, *J* = 9.2 Hz, 1H), 3.91 (s, 3H), 3.89 (s, 3H), 2.75 (d, *J* = 2.8 Hz, 1H).

**<sup>13</sup>C NMR** (100.6 MHz, CDCl<sub>3</sub>) δ 158.4, 149.1, 148.9, 132.2, 129.6 (2C), 121.3, 118.6, 114.6 (2C), 111.1, 109.3, 73.3, 72.4, 56.0, 55.9.

The <sup>1</sup>H and <sup>13</sup>C NMR spectra data of **1h** were consistent with the literature.<sup>6</sup>

### 1-(3,4-Dimethoxyphenyl)-2-phenylethan-1-ol (**1b**)

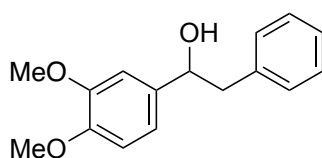

The reaction was carried out with Procedure A in 3.0 mmol scale using Et<sub>2</sub>O as solvent instead of THF. The product **1b** was purified by flash chromatography on silica gel (Biotage Selekt, 99:1–85:15, hexane/EtOAc) to afford **1b** (375.2 mg, 1.45 mmol, 48%) as a white solid.

**M.p.** 50–55 °C.

**IR** (neat) 3483, 2936, 1594, 1517, 1464, 1454, 1419, 1263, 1234, 1138 cm<sup>-1</sup>.

**<sup>1</sup>H NMR** (400 MHz, CDCl<sub>3</sub>) δ 7.32–7.28 (m, 2H), 7.23 (m, 1H), 7.20–7.18 (m, 2H), 6.89–6.87 (m, 2H), 6.83 (m, 1H), 4.86 (ddd, *J* = 7.2, 6.0, 2.4 Hz, 1H), 3.88 (s, 3H), 3.87 (s, 3H), 3.01 (m, 2H), 1.92 (d, *J* = 2.4 Hz, 1H).

**<sup>13</sup>C NMR** (100.6 MHz, CDCl<sub>3</sub>) δ 148.9, 148.4, 138.0, 136.5, 129.6 (2C), 128.5 (2C), 126.6, 118.1, 110.9, 109.0, 75.2, 55.9, 55.8, 46.1.

**HRMS–ESI** (*m/z*): [M+Na]<sup>+</sup> calcd for C<sub>16</sub>H<sub>18</sub>O<sub>3</sub>Na<sup>+</sup>, 281.1148; found, 281.1147.

### Cyclohexyl(3,4-dimethoxyphenyl)methanol (**1c**)

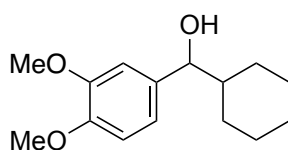

The reaction was carried out with Procedure A in 3.0 mmol scale. The product was purified by flash chromatography on silica gel (Biotage Selekt, 95:5–80:20, hexane/EtOAc) to afford **1c** (364.0 mg, 1.45 mmol, 48%) as a white solid.

**<sup>1</sup>H NMR** (400 MHz, CDCl<sub>3</sub>) δ 6.87 (m, 1H), 6.84–6.80 (m, 2H), 4.30 (d, *J* = 7.2 Hz, 1H), 3.90 (s, 3H), 3.88 (s, 3H), 2.02 (m, 1H), 1.79–1.76 (m, 2H), 1.68–1.57 (m, 3H), 1.36 (m, 1H), 1.30–0.99 (m, 4H), 0.90 (dq, *J* = 12.0, 3.2 Hz, 1H).

**<sup>13</sup>C NMR** (100.6 MHz, CDCl<sub>3</sub>) δ 148.9, 148.3, 136.3, 118.9, 110.6, 109.5, 79.3, 55.89, 55.86, 45.0, 29.3, 29.1, 26.4, 26.1, 26.0.

The <sup>1</sup>H and <sup>13</sup>C NMR spectra data of **1c** were consistent with the literature.<sup>7</sup>

### Ethyl 3-(3,4-dimethoxyphenyl)-3-hydroxy-2,2-dimethylpropanoate (**1d**)

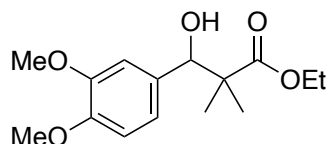

**1d** were prepared according to the literature.<sup>1</sup>

**<sup>1</sup>H NMR** (400 MHz, CDCl<sub>3</sub>) δ 6.88 (s, 1H), 6.85–6.80 (m, 2H), 4.84 (d, *J* = 4.0 Hz, 1H), 4.18 (q, *J* = 7.6 Hz, 2H), 3.88 (s, 6H), 3.15 (m, 1H), 1.27 (td, *J* = 10.8, 0.8 Hz, 3H), 1.15 (s, 3H), 1.11 (s, 3H).

**<sup>13</sup>C NMR** (100.6 MHz, CDCl<sub>3</sub>) δ 177.9, 148.5, 148.3, 132.6, 120.1, 110.8, 110.3, 78.5, 60.9, 55.8 (2C), 47.6, 23.1, 19.2, 14.1.

The <sup>1</sup>H and <sup>13</sup>C NMR spectra data of **1d** were consistent with the literature.<sup>5</sup>

### 3-(3,4-Dimethoxyphenyl)-3-hydroxy-2,2-dimethylpropanoic acid (**1e**)

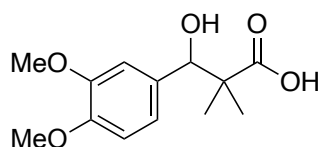

**1e** were prepared according to the modified procedure in literature.<sup>1</sup> In a 50 mL round-bottom flask, equipped with a magnetic stirring bar, **1d** (2.22 g, 7.86 mmol) was dissolved in THF. To the solution, H<sub>2</sub>O and NaOH (628.0 mg, 15.7 mmol) were added, and the obtained mixture was stirred for 4 h at room temperature. The THF was evaporated under reduced pressure and the aqueous residue was diluted with H<sub>2</sub>O, acidified with HCl (conc.) to pH 0 and extracted with EtOAc. The combined organic layers were dried over MgSO<sub>4</sub>, filtered, and evaporated under reduced pressure to afford **1e** (1.80 g, 7.08 mmol, 90%).

**<sup>1</sup>H NMR** (400 MHz, CDCl<sub>3</sub>) δ 6.90–6.82 (m, 3H), 4.88 (s, 1H), 3.88 (m, 6H), 1.18 (s, 3H), 1.17 (s, 3H). The signals for the protons of hydroxy group and carboxy group were not observed.

**<sup>13</sup>C NMR** (100.6 MHz, CDCl<sub>3</sub>) δ 181.4, 148.8, 148.5, 132.0, 120.1, 110.6, 110.5, 78.5, 55.90, 55.88, 47.5, 23.4, 19.1.

The <sup>1</sup>H and <sup>13</sup>C NMR spectra data of **1e** were consistent with the literature.<sup>5</sup>

### 1-(3,4-Dimethoxyphenyl)cyclohexan-1-ol (**1f**)

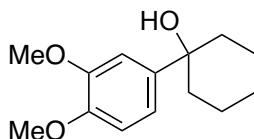

The reaction was carried out with Procedure A. The product was purified by flash chromatography on silica gel (Biotage Selekt, 97:3–85:15, hexane/EtOAc) to afford **1f** (474.0 mg, 2.01 mmol, 20%) as a white solid.

**<sup>1</sup>H NMR** (400 MHz, CDCl<sub>3</sub>) δ 7.11(d, *J* = 2.0 Hz, 1H), 7.01 (dd, *J* = 8.4, 2.0 Hz, 1H), 6.84 (d, *J* = 8.4 Hz, 1H), 3.91 (s, 3H), 3.88 (s, 3H), 1.87–1.70 (m, 7H), 1.66–1.61 (m, 2H), 1.54 (s, 1H), 1.29 (m, 1H).

**<sup>13</sup>C NMR** (100.6 MHz, CDCl<sub>3</sub>) δ 148.7, 147.7, 142.3, 116.5, 110.7, 108.4, 72.9, 55.88, 55.86, 38.9 (2C), 25.5, 22.2 (2C).

The <sup>1</sup>H and <sup>13</sup>C NMR spectra data of **1f** were consistent with the literature.<sup>8</sup>

### 1-(3,4-Dimethoxyphenyl)-2-methylcyclohexan-1-ol (**1g**)

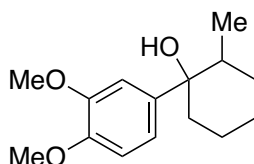

The reaction was carried out with Procedure A. The product was purified by flash chromatography on silica gel (Biotage Selekt, 98:2–85:15, hexane/EtOAc) to afford **1g** (1.38 g, 5.51 mmol, 55%, 1:1 of diastereomixture) as a white solid.

**M.p.** 59–64 °C.

**IR** (neat) 3525, 2930, 1511, 1408, 1257, 1166, 1142, 1027, 968, 855 cm<sup>-1</sup>.

**<sup>1</sup>H NMR** (400 MHz, CDCl<sub>3</sub>) δ 7.03 (d, *J* = 2.0 Hz, 1H), 6.95 (d, *J* = 2.0 Hz, 0.5 × 1H), 6.93 (d, *J* = 2.0 Hz, 0.5 × 1H), 6.84 (m, 1H), 3.90 (s, 3H), 3.88 (s, 3H), 1.90 (m, 1H), 1.80–1.59 (m, 6H), 1.51–1.38 (m, 2H), 0.65 (s, 0.5 × 3H), 0.63 (s, 0.5 × 3H). The signal for the proton of hydroxy group was not observed.

**<sup>13</sup>C NMR** (100.6 MHz, CDCl<sub>3</sub>) δ 148.5, 147.2, 141.3, 116.6, 110.7, 108.4, 75.6, 55.9, 55.8, 41.3, 39.9, 30.5, 26.1, 22.1, 15.6.

**HRMS–ESI** (m/z): [M+H]<sup>+</sup> calcd for C<sub>15</sub>H<sub>23</sub>O<sub>3</sub><sup>+</sup>, 251.1642; found, 251.1635.

### 1-(3,4-Dimethoxyphenyl)-2-(phenylthio)ethan-1-ol (**1i**)

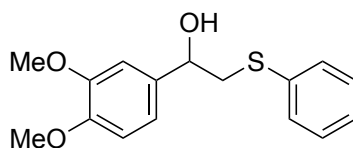

The reaction was carried out with Procedure B. The product was purified by flash chromatography on silica gel (Biotage Selekt, 95:5–75:25, hexane/EtOAc) to afford **1i** (461.0 mg, 1.59 mmol, 79%) as a white solid.

**M.p.** 70–75 °C.

**IR** (neat) 3482, 2933, 2834, 1515, 1481, 1464, 1438, 1418, 1260, 1232 cm<sup>-1</sup>.

**<sup>1</sup>H NMR** (400 MHz, CDCl<sub>3</sub>) δ 7.43–7.40 (m, 2H), 7.34–7.29 (m, 2H), 7.24 (m, 1H), 6.92 (d, *J* = 2.0 Hz, 1H), 6.86 (dd, *J* = 8.4, 2.0 Hz, 1H), 6.83 (d, *J* = 8.4 Hz, 1H), 4.69 (dd, *J* = 9.2, 3.6 Hz, 1H), 3.88 (s, 3H), 3.87 (s, 3H), 3.31 (dd, *J* = 13.6, 3.6 Hz, 1H), 3.12 (dd, *J* = 13.6, 9.2 Hz, 1H), 2.82 (s, 1H).

**<sup>13</sup>C NMR** (100.6 MHz, CDCl<sub>3</sub>) δ 149.1, 148.7, 134.9, 134.7, 130.2 (2C), 129.1 (2C), 126.8, 118.2, 111.0, 108.8, 71.5, 55.91, 55.86, 43.9.

**HRMS–ESI** (*m/z*): [M+H]<sup>+</sup> calcd for C<sub>16</sub>H<sub>19</sub>O<sub>3</sub>S<sup>+</sup>, 291.1049; found, 291.1059.

### 1-(3,4-Dimethoxyphenyl)-2-(methyl(phenyl)amino)ethan-1-ol (**1j**)

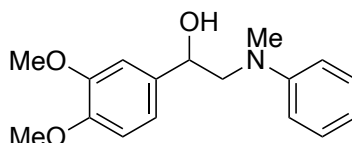

The reaction was carried out with Procedure B. The product was purified by flash chromatography on silica gel (Biotage Selekt, 95:5–75:25, hexane/EtOAc) to afford **1j** (417.6 mg, 1.45 mmol, 73%) as a white solid.

**M.p.** 90–95 °C.

**IR** (neat) 3513, 2934, 1599, 1505, 1263, 1234, 1139, 1207, 750, 694 cm<sup>-1</sup>.

**<sup>1</sup>H NMR** (400 MHz, CDCl<sub>3</sub>) δ 7.29–7.25 (m, 2H), 6.98–6.92 (m, 2H), 6.88–6.84 (m, 3H), 6.78 (m, 1H), 4.95 (ddd, *J* = 8.8, 4.4, 1.6 Hz, 1H), 3.91 (s, 3H), 3.89 (s, 3H), 3.53 (dd, *J* = 14.8, 8.8 Hz, 1H), 3.41 (dd, *J* = 14.8, 4.4 Hz, 1H), 2.94 (s, 3H), 2.47 (d, *J* = 1.6 Hz, 1H).

**<sup>13</sup>C NMR** (100.6 MHz, CDCl<sub>3</sub>) δ 150.0, 149.2, 148.6, 134.6, 129.2 (2C), 118.2, 117.5, 113.3 (2C), 111.1, 108.9, 71.5, 62.0, 55.9 (2C), 39.4.

**HRMS–ESI** (*m/z*): [M+H]<sup>+</sup> calcd for C<sub>17</sub>H<sub>22</sub>NO<sub>3</sub><sup>+</sup>, 288.1594; found, 288.1587.

### (8*R*,9*S*,13*S*,14*S*)-3-(2-(3,4-Dimethoxyphenyl)-2-hydroxyethoxy)-13-methyl-7,8,9,11,12,13,14,15,16,17-decahydro-6*H*-cyclopenta[*a*]phenanthren-17-ol (**1k**)

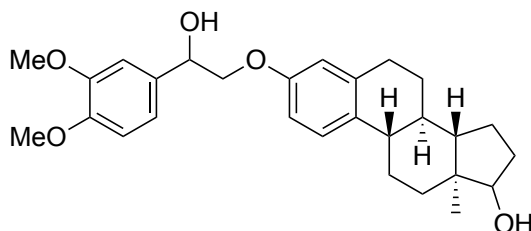

The reaction was carried out with Procedure B in 6.0 mmol scale using K<sub>2</sub>CO<sub>3</sub> as base instead of Na<sub>2</sub>CO<sub>3</sub>. The product was purified by flash chromatography on silica gel (Biotage Selekt, 85:15–65:35, hexane/EtOAc) to afford **1k** (1.37 mg, 3.02 mmol, 50%) as a white solid.

**M.p.** 117–122 °C.

**IR** (neat) 3368, 2932, 2855, 1521, 1507, 1255, 1234, 1138, 1087, 1050 cm<sup>-1</sup>.

**<sup>1</sup>H NMR** (400 MHz, CDCl<sub>3</sub>) δ 7.21 (d, *J* = 8.4 Hz, 1H), 7.01 (d, *J* = 1.8 Hz, 1H), 6.97 (d, *J* = 8.4 Hz, 1H), 6.87 (d, *J* = 8.4 Hz, 1H), 6.73 (dd, *J* = 8.4, 2.8 Hz, 1H), 6.65 (d, *J* = 2.8 Hz, 1H), 5.05 (dd, *J* = 8.8, 3.2 Hz, 1H), 4.06 (m, 1H), 3.96 (m, 1H), 3.91 (s, 3H), 3.89 (s, 3H), 3.73 (t, *J* = 8.4 Hz, 1H), 2.87–2.78 (m, 3H), 2.31 (m, 1H), 2.22–2.07 (m, 2H), 1.95 (m, 1H), 1.87 (m, 1H), 1.70 (m, 1H), 1.54–1.15 (m, 8H), 0.78 (s, 3H).

**<sup>13</sup>C NMR** (100.6 MHz, CDCl<sub>3</sub>) δ 156.2, 149.1, 148.8, 138.2, 133.4, 132.3, 126.4, 118.6, 114.6, 112.2, 111.0, 109.3, 81.9, 73.5, 72.4, 55.93, 55.88, 50.0, 43.9, 43.2, 38.8, 36.7, 30.6, 29.8, 27.2, 26.3, 23.1, 11.0.

**HRMS–ESI** (*m/z*): [M+H]<sup>+</sup> calcd for C<sub>28</sub>H<sub>37</sub>O<sub>5</sub><sup>+</sup>, 453.2636; found, 453.2633.

### 1-(3,4-Dimethoxyphenyl)-2-(2-ethoxyphenoxy)propane-1,3-diol (**1l**)

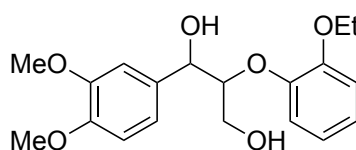

The reaction was carried out with the literature.<sup>9</sup> white solid. The ratio (3:1) of the diastereomers was determined by <sup>1</sup>H NMR analysis.

**M.p.** 75–80 °C.

**IR** (neat) 3485, 2936, 1593, 1515, 1498, 1454, 1252, 1205, 1139, 1119 cm<sup>-1</sup>.

**<sup>1</sup>H NMR** (400 MHz, CDCl<sub>3</sub>) δ 7.16–6.81 (m, 7H), 5.00 (m, 1H), 4.17–4.08 (m, 2H + 0.75 × 1H), 3.95–3.88 (m, 6H), 3.79 (m, 0.25 × 1H), 3.66–3.60 (m, 1H + 0.75 × 1H), 3.46 (m, 0.25 × 1H), 2.80 (m, 1H), 1.60 (m, 1H), 1.53–1.46 (m, 3H).

**<sup>13</sup>C NMR** (100.6 MHz, CDCl<sub>3</sub>) δ 151.2, 150.9, 149.0, 148.4, 147.5, 146.9, 132.2, 132.0, 124.5, 121.9, 121.6, 119.7, 118.3, 113.1, 111.0, 109.8, 109.0, 90.1, 88.1, 73.9, 72.5, 64.4, 60.8, 60.6, 55.9, 14.7 (only observed peaks).

**HRMS–ESI** (*m/z*): [M+Na]<sup>+</sup> calcd for C<sub>19</sub>H<sub>24</sub>O<sub>6</sub>Na<sup>+</sup>, 371.1465; found, 371.1454.

### 1-(4-(Hexyloxy)phenyl)-2,2-dimethylpropan-1-ol (**1m**)

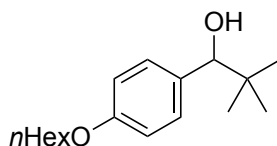

The reaction was carried out with Procedure A in 4.0 mmol scale. The product was purified by flash chromatography on silica gel (Biotage Selekt, 99:1–93:7, hexane/EtOAc) to afford **1m** (588.3 mg, 2.11 mmol, 53%) as a colorless oil.

**IR** (neat) 3462, 2953, 2932, 2870, 1612, 1511, 1241, 1173, 1005, 832 cm<sup>-1</sup>.

**<sup>1</sup>H NMR** (400 MHz, CDCl<sub>3</sub>) δ 7.21 (d, *J* = 8.8 Hz, 2H), 6.84 (d, *J* = 8.8 Hz, 2H), 4.35 (d, *J* = 2.8 Hz, 1H), 3.95 (t, *J* = 6.8 Hz, 2H), 1.81–1.74 (m, 3H), 1.49–1.42 (m, 2H), 1.36–1.32 (m, 4H), 0.92–0.89 (m, 12H).

$^{13}\text{C}$  NMR (100.6 MHz,  $\text{CDCl}_3$ )  $\delta$  158.4, 134.2, 128.6 (2C), 113.5 (2C), 82.0, 68.0, 35.7, 31.6, 29.3, 25.9 (3C), 25.7, 22.6, 14.0.

HRMS–ESI (m/z):  $[\text{M}+\text{Na}]^+$  calcd for  $\text{C}_{17}\text{H}_{28}\text{O}_2\text{Na}^+$ , 287.1982; found, 287.1978.

### 2,2-Dimethyl-1-(4-phenoxyphenyl)propan-1-ol (**1n**)

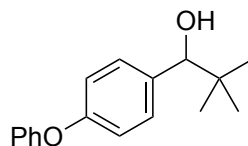

The reaction was carried out with Procedure A in 4.0 mmol scale. The product was purified by flash chromatography on silica gel (Biotage Selekt, 99:1–95:5, hexane/EtOAc) to afford **1n** (716.7 mg, 2.80 mmol, 70%) as a white solid.

M.p. 80–85 °C.

IR (neat) 3421, 2952, 2868, 1589, 1505, 1488, 1363, 1232, 1168, 1046  $\text{cm}^{-1}$ .

$^1\text{H}$  NMR (400 MHz,  $\text{CDCl}_3$ )  $\delta$  7.36–7.31 (m, 2H), 7.29–7.26 (m, 2H), 7.10 (m, 1H), 7.03–6.99 (m, 2H), 6.98–6.94 (m, 2H), 4.40 (d,  $J = 2.8$  Hz, 1H), 1.82 (d,  $J = 2.8$  Hz, 1H), 0.93 (s, 9H).

$^{13}\text{C}$  NMR (100.6 MHz,  $\text{CDCl}_3$ )  $\delta$  157.2, 156.4, 137.0, 129.7 (2C), 128.9 (2C), 123.2, 118.8 (2C), 117.9 (2C), 82.0, 35.7, 25.9 (3C).

HRMS–ESI (m/z):  $[\text{M}+\text{H}]^+$  calcd for  $\text{C}_{17}\text{H}_{21}\text{O}_2^+$ , 257.1536; found, 257.1527.

### 1-(6-Methoxynaphthalen-2-yl)-2,2-dimethylpropan-1-ol (**1o**)

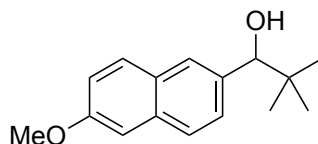

The reaction was carried out with Procedure A. The product **1o** was purified by flash chromatography on silica gel (Biotage Selekt, 99:1–95:5, hexane/EtOAc) to afford **1o** (1.76 g, 7.20 mmol, 72%) as a white solid.

M.p. 109–114 °C.

IR (neat) 3459, 2953, 1633, 1607, 1507, 1482, 1464, 1392, 1363, 1264  $\text{cm}^{-1}$ .

$^1\text{H}$  NMR (400 MHz,  $\text{CDCl}_3$ )  $\delta$  7.74–7.68 (m, 3H), 7.43 (dd,  $J = 8.4, 1.6$  Hz, 1H), 7.16–7.13 (m, 2H), 4.54 (d,  $J = 2.8$  Hz, 1H), 3.92 (s, 3H), 1.92 (d,  $J = 2.8$  Hz, 1H), 0.97 (s, 9H).

$^{13}\text{C}$  NMR (100.6 MHz,  $\text{CDCl}_3$ )  $\delta$  157.6, 137.5, 133.9, 129.5, 128.3, 126.5, 126.1, 125.8, 118.1, 105.5, 82.5, 55.3, 35.9, 26.0 (3C).

HRMS–ESI (m/z):  $[\text{M}+\text{Na}]^+$  calcd for  $\text{C}_{16}\text{H}_{20}\text{O}_2\text{Na}^+$ , 267.1356; found, 267.1353.

### 1-(4-Hexylphenyl)-2,2-dimethylpropan-1-ol (**1p**)

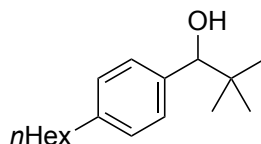

The reaction was carried out with Procedure A in 3.0 mmol scale. The product was purified by flash chromatography on silica gel (Biotage Selekt, 99:1–95:5, hexane/EtOAc) to afford **1p** (437.1 mg, 1.67 mmol, 56%) as a colorless oil.

**IR** (neat) 3447, 2955, 2927, 2857, 1458, 1363, 1179, 1049, 1005, 905  $\text{cm}^{-1}$ .

**$^1\text{H NMR}$**  (400 MHz,  $\text{CDCl}_3$ )  $\delta$  7.21 (d,  $J = 8.0$  Hz, 2H), 7.12 (d,  $J = 8.0$  Hz, 2H), 4.37 (d,  $J = 2.8$  Hz, 1H), 2.58 (t,  $J = 7.6$  Hz, 2H), 1.79 (d,  $J = 2.8$  Hz, 1H), 1.64–1.58 (m, 2H), 1.36–1.27 (m, 6H), 0.92 (s, 9H), 0.88 (t,  $J = 6.8$  Hz, 3H).

**$^{13}\text{C NMR}$**  (100.6 MHz,  $\text{CDCl}_3$ )  $\delta$  142.0, 139.4, 127.6 (2C), 127.5 (2C), 82.3, 35.6, 31.7 (2C), 31.5, 29.0, 25.9 (3C), 22.6, 14.1.

**HRMS–ESI** ( $m/z$ ):  $[\text{M}+\text{H}]^+$  calcd for  $\text{C}_{17}\text{H}_{29}\text{O}^+$ , 249.2213; found, 249.2218.

### 2,2-Dimethyl-1-(naphthalen-2-yl)propan-1-ol (**1q**)

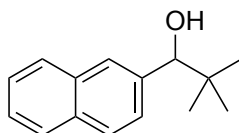

The reaction was carried out with Procedure A in 3.0 mmol scale. The product was purified by flash chromatography on silica gel (Biotage Selekt, 99:1–92:8, hexane/EtOAc) to afford **1q** (514.0 mg, 2.40 mmol, 80%) as a white solid.

**M.p.** 61–66  $^{\circ}\text{C}$ .

**IR** (neat) 3444, 2953, 2868, 1479, 1365, 1123, 1051, 1008, 856, 822  $\text{cm}^{-1}$ .

**$^1\text{H NMR}$**  (400 MHz,  $\text{CDCl}_3$ )  $\delta$  7.84–7.76 (m, 4H), 7.50–7.44 (m, 3H), 4.58 (d,  $J = 2.8$  Hz, 1H), 1.95 (d,  $J = 2.8$  Hz, 1H), 0.98 (s, 9H).

**$^{13}\text{C NMR}$**  (100.6 MHz,  $\text{CDCl}_3$ )  $\delta$  139.8, 132.83, 132.82, 128.0, 127.6, 127.0, 126.3, 126.0, 125.9, 125.7, 82.5, 36.0, 26.0 (3C).

**HRMS–ESI** ( $m/z$ ):  $[\text{M}+\text{H}]^+$  calcd for  $\text{C}_{15}\text{H}_{19}\text{O}^+$ , 215.1430; found, 215.1434.

### 2-(4-(Benzyloxy)phenyl)ethan-1-ol (**1r**)

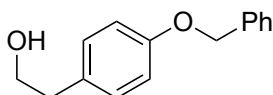

**1r** were prepared according to the literature.<sup>10</sup>

**$^1\text{H NMR}$**  (400 MHz,  $\text{CDCl}_3$ )  $\delta$  7.45–7.42 (m, 2H), 7.40–7.36 (m, 2H), 7.32 (m, 1H), 7.17–7.13 (m, 2H), 6.95–6.92 (m, 2H), 5.05 (s, 2H), 3.83 (dd,  $J = 12.4, 6.4$  Hz, 2H), 2.82 (t,  $J = 6.4$  Hz, 2H), 1.36 (t,  $J = 6.0$  Hz, 1H).

$^{13}\text{C}$  NMR (100.6 MHz,  $\text{CDCl}_3$ )  $\delta$  157.5, 137.1, 130.7, 130.0(2C), 128.6(2C), 127.9, 127.4 (2C), 115.0 (2C), 70.0, 63.8, 38.3.

The  $^1\text{H}$  and  $^{13}\text{C}$  NMR spectra data of **1s** were consistent with the literature.<sup>11</sup>

### Ethyl 3-(3,4-dimethoxyphenyl)-2,2-difluoro-3-hydroxypropanoate (**1s**)

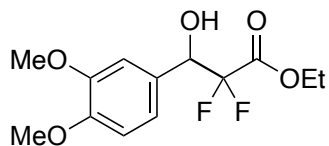

In a 50 mL round-bottom flask, equipped with a magnetic stirring bar, 3,4-dimethoxybenzaldehyde (1.66 g, 10.0 mmol) and ethyl bromodifluoroacetate (1.55 mL, 12.0 mmol) were dissolved in THF (10 mL).  $\text{ZnEt}_2$  (1.09 M in Hexane) (18.3 mL, 20.0 mmol) was dropwisely added at 0 °C, and the obtained mixture was stirred for 40 h at room temperature. Then, acidified with HCl (10%) to pH 7 and extracted with EtOAc. The organic layer was dried with  $\text{Na}_2\text{SO}_4$  and concentrated. The crude was purified by flash chromatography on silica gel (Biotage Selekt, 85:15–70:30, hexane/EtOAc) to yield benzyl alcohol **1s** as a pale-yellow solid (2.14 g, 7.36 mmol, 74%).

**M.p.** 55–60 °C.

**IR** (neat) 3485, 1755, 1517, 1307, 1261, 1235, 1140, 1070, 1023, 761  $\text{cm}^{-1}$ .

$^1\text{H}$  NMR (400 MHz,  $\text{CDCl}_3$ )  $\delta$  7.00–6.97 (m, 2H), 6.87 (d,  $J = 8.0$  Hz, 1H), 7.32 (m, 1H), 5.12 (dd,  $J = 15.6, 8.0$  Hz, 1H), 4.32 (q,  $J = 7.2$  Hz, 2H), 3.90 (s, 3H), 3.89 (s, 3H), 1.32 (t,  $J = 7.2$  Hz, 3H).

$^{13}\text{C}$  NMR (100.6 MHz,  $\text{CDCl}_3$ )  $\delta$  163.6 (t,  $J = 31.6$  Hz), 149.7, 149.0, 126.7, 120.4, 113.7 (dd,  $J = 259.4, 253.7$  Hz), 110.7, 110.4, 73.6 (dd,  $J = 27.9, 24.1$  Hz), 63.1, 55.89, 55.87, 13.9.

$^{19}\text{F}$  NMR (376.5 MHz,  $\text{CDCl}_3$ )  $\delta$  -114.1 (d,  $J = 261.1$  Hz), -120.6 (d,  $J = 261.1$  Hz).

**HRMS–ESI** ( $m/z$ ):  $[\text{M}+\text{Na}]^+$  calcd for  $\text{C}_{13}\text{H}_{16}\text{F}_2\text{O}_5\text{Na}^+$ , 313.0849; found, 313.0858.

### 2,2-Dimethyl-1-phenylpropan-1-ol (**1t**)

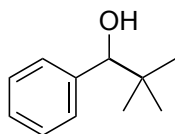

The reaction was carried out with Procedure A in 5.0 mmol scale. The product was purified by flash chromatography on silica gel (Biotage Selekt, 99:1–92:8, hexane/EtOAc) to afford **1t** (711.7 mg, 4.33 mmol, 87%) as a white solid.

**M.p.** 43–48 °C.

**IR** (neat) 3439, 2953, 1479, 1452, 1363, 1046, 1005, 899, 734, 702  $\text{cm}^{-1}$ .

$^1\text{H}$  NMR (400 MHz,  $\text{CDCl}_3$ )  $\delta$  7.32–7.31 (m, 4H), 7.26 (m, 1H), 4.41 (d,  $J = 2.8$  Hz, 1H), 1.83 (d,  $J = 2.8$  Hz, 1H), 0.93 (s, 9H).

$^{13}\text{C}$  NMR (100.6 MHz,  $\text{CDCl}_3$ )  $\delta$  142.1, 127.6 (2C), 127.5 (2C), 127.3, 82.4, 35.6, 25.9 (3C).

**HRMS–ESI** ( $m/z$ ):  $[\text{M}+\text{Na}]^+$  calcd for  $\text{C}_{11}\text{H}_{16}\text{ONa}^+$ , 187.1101; found, 187.1093.



### 1-(3,4-Dimethoxyphenyl)ethan-1-ol (**1u**)

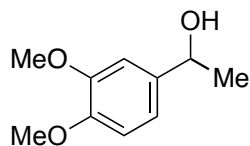

In a 50 mL round-bottom flask, equipped with a magnetic stirring bar, 3,4-dimethoxybenzaldehyde (997.1 mg, 6.0 mmol) was dissolved in THF (10 mL). MeLi (3.1 M in diethoxymethane) (1.6 mL, 5.0 mmol) was dropwise at  $-78\text{ }^{\circ}\text{C}$ , and the obtained mixture was stirred for 1 h at room temperature. Then, acidified with  $\text{NH}_4\text{Cl}$  aq and extracted with EtOAc. The organic layer was dried with  $\text{Na}_2\text{SO}_4$  and concentrated. The crude product was purified by silica flash chromatography (Biotage Selekt, 95:5–70:30, hexane/EtOAc) to yield benzyl alcohol **1u** as a pale-yellow oil (898.4 mg, 4.93 mmol, 99%).

**IR** (neat) 3394, 2967, 1366, 1515, 1464, 1418, 1257, 1231, 1138, 1024  $\text{cm}^{-1}$ .

**$^1\text{H}$  NMR** (400 MHz,  $\text{CDCl}_3$ )  $\delta$  6.95 (d,  $J = 1.6$  Hz, 1H), 6.90 (dd,  $J = 8.4, 1.6$  Hz, 1H), 6.84 (d,  $J = 8.4$  Hz, 1H), 4.86 (q,  $J = 6.4$  Hz, 1H), 3.91 (s, 3H), 3.88 (s, 3H), 1.79 (bs, 1H), 1.50 (d,  $J = 6.4$  Hz, 3H).

**$^{13}\text{C}$  NMR** (100.6 MHz,  $\text{CDCl}_3$ )  $\delta$  149.0, 148.3, 138.5, 117.5, 110.9, 108.5, 70.2, 55.9, 55.8, 25.1.

**HRMS–ESI** (m/z):  $[\text{M}+\text{Na}]^+$  calcd for  $\text{C}_{10}\text{H}_{14}\text{O}_3\text{Na}^+$ , 205.0834; found, 205.0835.

## 5. Optimization for $\beta$ -Scission (HAT)

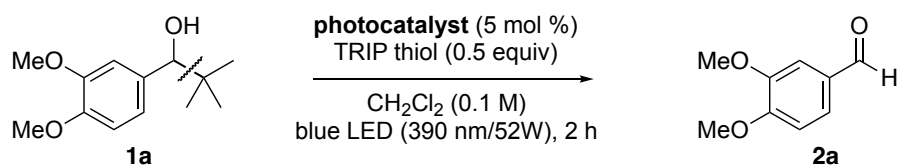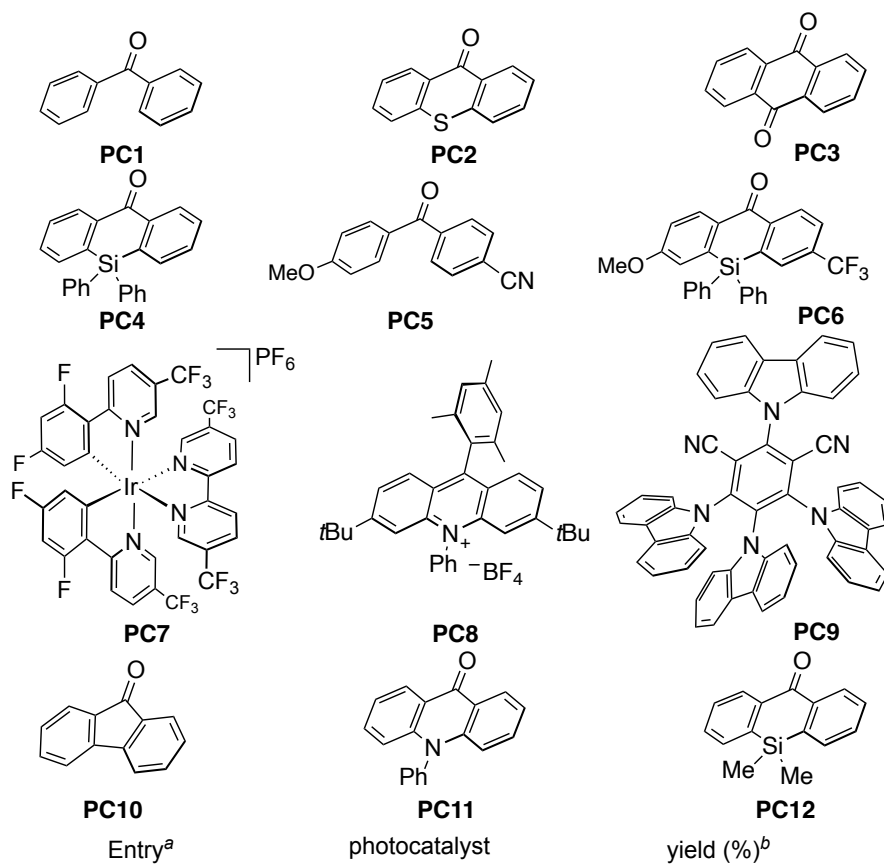

<sup>a</sup>Reaction was carried out with **1a** (0.1 mmol), photocatalyst (5  $\mu$ mol), and TRIP thiol (0.05 mmol) in CH<sub>2</sub>Cl<sub>2</sub> (1 mL) under 390 nm blue LED (Kessil lamp) irradiation at ambient temperature for 2 h. <sup>b</sup><sup>1</sup>H NMR yield. <sup>c</sup>1 mol% of photocatalyst was used. <sup>d</sup>Isolated yield. <sup>e</sup>The reaction was carried out with Half intensity of LED light.

**Table S1.** Effect of Photocatalyst

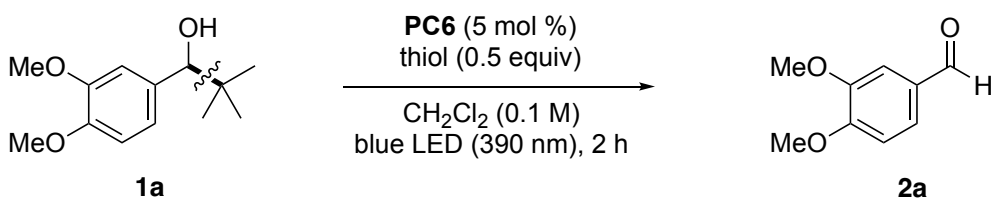

| Entry <sup>a</sup> | thiol                             | yield (%) <sup>b</sup> |
|--------------------|-----------------------------------|------------------------|
| 1                  | TRIP thiol                        | 93 <sup>c</sup>        |
| 2                  | <i>n</i> -dodecanthiol            | 28                     |
| 3                  | C <sub>6</sub> H <sub>5</sub> SH  | 84                     |
| 4                  | ( <i>i</i> -Pr) <sub>3</sub> SiSH | 12                     |

<sup>a</sup> Reaction was carried out with **1a** (0.1 mmol), **PC6** (5 μmol), and thiol (0.05 mmol) in CH<sub>2</sub>Cl<sub>2</sub> (1 mL) under 390 nm blue LED (Kessil lamp) irradiation at ambient temperature for 2 h. <sup>b</sup> <sup>1</sup>H NMR yield. <sup>c</sup> Isolated yield.

**Table S2.** Effect of thiol

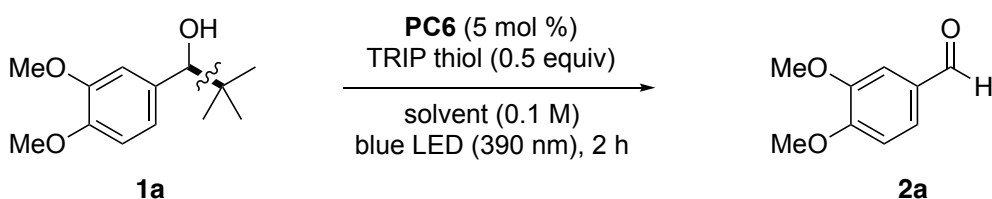

| Entry <sup>a</sup> | solvent                         | yield (%) <sup>b</sup> |
|--------------------|---------------------------------|------------------------|
| 1                  | CH <sub>2</sub> Cl <sub>2</sub> | 93 <sup>c</sup>        |
| 2                  | MeCN                            | 80                     |
| 3                  | THF                             | 65                     |
| 4                  | AcOEt                           | 77                     |

<sup>a</sup> Reaction was carried out with **1a** (0.1 mmol), **PC6** (5 μmol), and TRIP thiol (0.05 mmol) in solvent (1 mL) under 390 nm blue LED (Kessil lamp) irradiation at ambient temperature for 2 h. <sup>b</sup> <sup>1</sup>H NMR yield. <sup>c</sup> Isolated yield.

**Table S3.** Effect of solvent

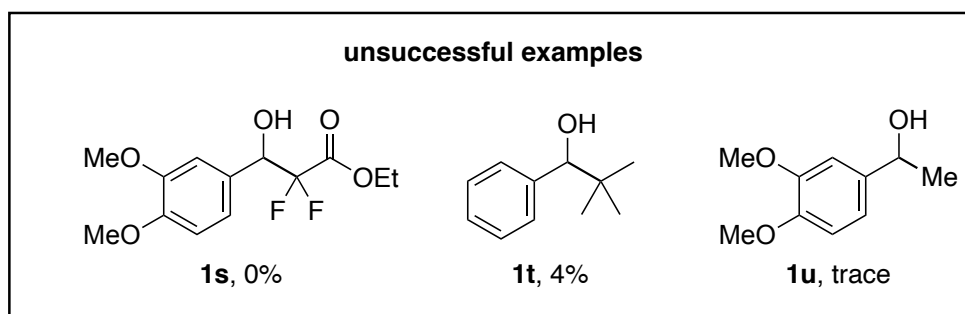

## 6. Procedure for $\beta$ -Scission (HAT)

The reaction in Table 1, entry 6 is representative.

In a glovebox, a vial equipped with a stirring bar was charged with photoredox catalyst **PC6** (2.3 mg, 5  $\mu$ mol), benzyl alcohol **1a** (22.4 mg, 0.1 mmol), TRIP thiol (12.6  $\mu$ L, 0.05 mmol), and  $\text{CH}_2\text{Cl}_2$  (1.0 mL). After sealing the vial with a cap and removing it from the glovebox, the reaction was stirred and irradiated with a 390 nm blue LED placed 0.5 cm away, with a cooling fan to keep the temperature below 50  $^\circ\text{C}$  (Figure S4). After 2 h, the volatiles were removed under reduced pressure, and purification by flash column chromatography on silica gel (97:3–88:12, hexane/EtOAc) gave **2a** (15.5 mg, 0.09 mmol, 93% isolated yield) as a pale-yellow oil.

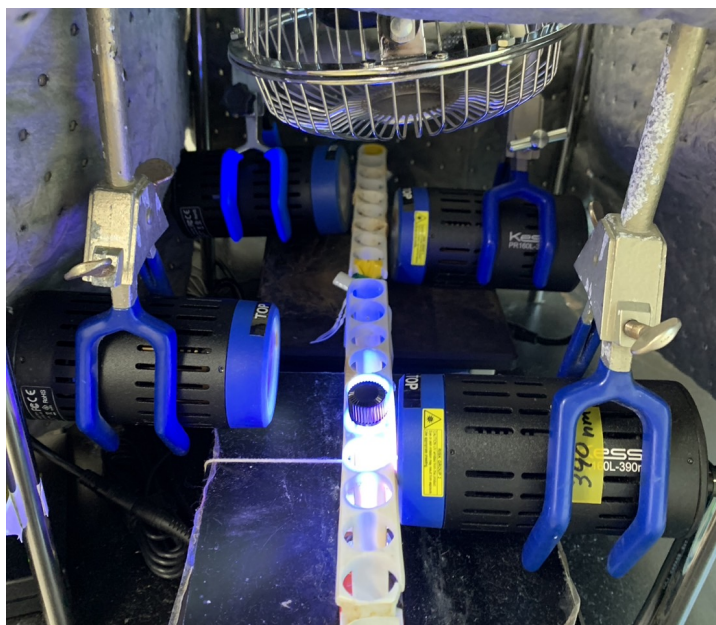

Figure S4. Light set up

## 7. Characterization Data for Products of $\beta$ -Scission (HAT)

### 3,4-Dimethoxybenzaldehyde (**2a**)

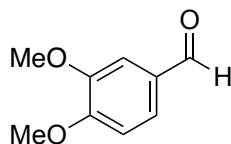

The product was purified by flash chromatography on silica gel (95:5–85:15, hexane/EtOAc) to afford **2a** (Table 1 entry 6; 15.5 mg, 0.093 mmol, 93% isolated yield) as a pale-yellow oil.

$^1\text{H}$  NMR (400 MHz,  $\text{CDCl}_3$ )  $\delta$  9.86 (s, 1H), 7.47 (dd,  $J = 8.0, 2.0$  Hz, 1H), 7.42 (d,  $J = 2.0$  Hz, 1H), 6.99 (d,  $J = 8.0$  Hz, 1H), 3.98 (s, 3H), 3.95 (s, 3H).

$^{13}\text{C}$  NMR (100.6 MHz,  $\text{CDCl}_3$ )  $\delta$  190.9, 154.5, 149.6, 130.1, 126.9, 110.4, 108.9, 56.2, 56.0.

The  $^1\text{H}$  and  $^{13}\text{C}$  NMR spectra data of **2a** was consistent with the literature.<sup>12</sup>

### 1-(3,4-Dimethoxyphenyl)hexan-1-one (2f)

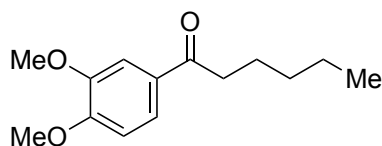

The product was purified by flash chromatography on silica gel (98:2–93:7, hexane/EtOAc) to afford **2f** (Figure 3B; 32,6 mg, 0.14 mmol, 69% isolated yield) as a pale-yellow oil.

**<sup>1</sup>H NMR** (400 MHz, CDCl<sub>3</sub>) δ 7.59 (dd, *J* = 8.4, 2.0 Hz, 1H), 7.54 (d, *J* = 2.0 Hz, 1H), 6.89 (d, *J* = 8.4 Hz, 1H), 3.95 (s, 3H), 3.94 (s, 3H), 2.92 (t, *J* = 7.6 Hz, 2H), 1.77–1.70 (m, 2H), 1.39–1.34 (m, 4H), 0.93–0.90 (m, 3H).

**<sup>13</sup>C NMR** (100.6 MHz, CDCl<sub>3</sub>) δ 199.3, 153.0, 149.0, 130.4, 122.6, 110.2, 109.9, 56.04, 55.95, 38.1, 31.6, 24.5, 22.5, 14.0.

The <sup>1</sup>H and <sup>13</sup>C NMR spectra data of **2f** were consistent with the literature.<sup>13</sup>

### 1-(3,4-Dimethoxyphenyl)heptan-1-one (2g)

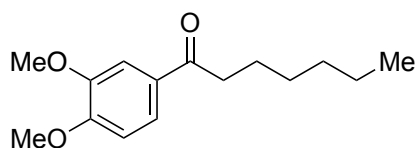

The product was purified by flash chromatography on silica gel (98:2–93:7, hexane/EtOAc) to afford **2g** (Figure 3B; 43.1 mg, 0.17 mmol, 86% isolated yield) as a pale yellow oil.

**IR** (neat) 2930, 1672, 1586, 1514, 1416, 1343, 1260, 1148, 1132, 1023 cm<sup>-1</sup>.

**<sup>1</sup>H NMR** (400 MHz, CDCl<sub>3</sub>) δ 7.59 (dd, *J* = 8.4, 2.0 Hz, 1H), 7.54 (d, *J* = 2.0 Hz, 1H), 6.89 (d, *J* = 8.4 Hz, 1H), 3.95 (s, 3H), 3.94 (s, 3H), 2.92 (t, *J* = 7.6 Hz, 2H), 1.73 (tt, *J* = 7.6, 7.6 Hz, 2H), 1.40–1.29 (m, 6H), 0.89 (t, *J* = 6.8 Hz, 3H).

**<sup>13</sup>C NMR** (100.6 MHz, CDCl<sub>3</sub>) δ 199.3, 153.1, 149.0, 130.3, 122.6, 110.1, 109.9, 56.0, 55.9, 38.2, 31.7, 29.1, 24.7, 22.5, 14.0.

**HRMS–ESI** (*m/z*): [M+H]<sup>+</sup> calcd for C<sub>15</sub>H<sub>23</sub>O<sub>3</sub><sup>+</sup>, 251.1642; found, 251.1634.

### (8*R*,9*S*,13*S*,14*S*)-3-Methoxy-13-methyl-7,8,9,11,12,13,14,15,16,17-decahydro-6*H*-cyclopenta[*a*]phenanthren-17-ol (2k)

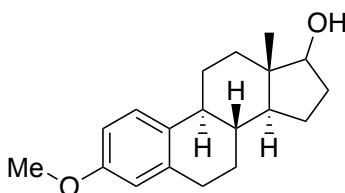

The product was purified by flash chromatography on silica gel (95:5–85:15, hexane/EtOAc) to afford **2k** (Figure 3B; 28.2 mg, 0.098 mmol, 49% isolated yield) as a white solid.

**<sup>1</sup>H NMR** (400 MHz, CDCl<sub>3</sub>) δ 7.21 (d, *J* = 8.4 Hz, 1H), 6.71 (dd, *J* = 8.4, 2.8 Hz, 1H), 6.63 (d, *J* = 2.8 Hz, 1H), 3.78 (s, 3H), 3.73 (t, *J* = 8.4 Hz, 1H), 2.88–2.84 (m, 2H), 2.32 (m, 1H), 2.22–2.08 (m, 2H), 1.95 (m, 1H), 1.88 (m, 1H), 1.70 (m, 1H), 1.55–1.16 (m, 8H), 0.78 (s, 3H).

**<sup>13</sup>C NMR** (100.6 MHz, CDCl<sub>3</sub>) δ 157.4, 138.0, 132.6, 126.3, 113.8, 111.4, 81.9, 55.2, 50.0, 43.9, 43.2, 38.8, 36.7, 30.6, 29.8, 27.2, 26.3, 23.1, 11.0.

The <sup>1</sup>H and <sup>13</sup>C NMR spectra data of **2k** were consistent with the literature.<sup>14</sup>

## 2-(2-Ethoxyphenoxy)ethan-1-ol (**2l**)

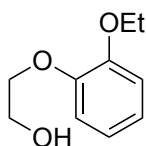

The reaction was carried out using **PC6** (10 mol %). The product **2l** was purified by flash chromatography on silica gel (95:5–85:15, hexane/EtOAc) to afford **2l** (Figure 3B; 11.9 mg, 0.065 mmol, 33% isolated yield) as a colorless oil.

**IR** (neat) 3416, 2932, 1593, 1501, 1478, 1452, 1392, 1326, 1250, 1214 cm<sup>-1</sup>.

**<sup>1</sup>H NMR** (400 MHz, CDCl<sub>3</sub>) δ 6.99–6.95 (m, 2H), 6.92–6.87 (m, 2H), 4.14–4.12 (m, 2H), 4.10–4.05 (m, 2H), 3.88 (t, *J* = 4.4 Hz, 2H), 2.93 (brs, 1H), 1.45 (t, *J* = 7.2 Hz, 3H).

**<sup>13</sup>C NMR** (100.6 MHz, CDCl<sub>3</sub>) δ 149.6, 148.2, 122.5, 121.1, 116.6, 113.3, 72.3, 64.4, 61.2, 14.8.

**HRMS–ESI** (*m/z*): [M+H]<sup>+</sup> calcd for C<sub>10</sub>H<sub>15</sub>O<sub>3</sub><sup>+</sup>, 183.1016; found, 183.1010.

## 4-(Hexyloxy)benzaldehyde (**2m**)

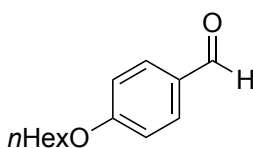

The product was purified by flash chromatography on silica gel (100:0–97:3, hexane/EtOAc) to afford **2m** (Figure 3B; 37.6 mg, 0.18 mmol, 91% isolated yield) as a pale-yellow oil.

**<sup>1</sup>H NMR** (400 MHz, CDCl<sub>3</sub>) δ 9.88 (s, 1H), 7.83 (d, *J* = 8.8 Hz, 2H), 6.99 (d, *J* = 8.8 Hz, 2H), 4.04 (t, *J* = 6.8 Hz, 2H), 1.81 (tt, *J* = 6.8, 6.8 Hz, 2H), 1.47 (tt, *J* = 6.8, 6.8 Hz, 2H), 1.37–1.33 (m, 4H), 0.91 (t, *J* = 6.8 Hz, 3H).

**<sup>13</sup>C NMR** (100.6 MHz, CDCl<sub>3</sub>) δ 190.8, 164.3, 132.0 (2C), 129.7, 114.7 (2C), 68.4, 31.5, 29.0, 25.6, 22.6, 14.0.

The <sup>1</sup>H and <sup>13</sup>C NMR spectra data of **2m** were consistent with the literature.<sup>15</sup>

## 4-Phenoxybenzaldehyde (**2n**)

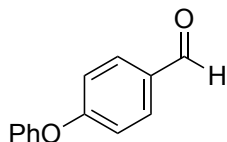

The product **2n** was purified by flash chromatography on silica gel (100:0–97:3, hexane/EtOAc) to afford **2n** (Figure 3B; 33.2 mg, 0.17 mmol, 84% isolated yield) as a pale-yellow oil.

<sup>1</sup>H NMR (400 MHz, CDCl<sub>3</sub>) δ 9.93 (s, 1H), 7.87–7.83 (m, 2H), 7.44–7.39 (m, 2H), 7.23 (t, *J* = 7.6 Hz, 1H), 7.09 (d, *J* = 7.6 Hz, 2H), 7.06 (d, *J* = 8.8 Hz, 2H).

<sup>13</sup>C NMR (100.6 MHz, CDCl<sub>3</sub>) δ 190.8, 163.2, 155.1, 131.9 (2C), 131.2, 130.1 (2C), 124.9, 120.4 (2C), 117.6 (2C).

The <sup>1</sup>H and <sup>13</sup>C NMR spectra data of **2n** were consistent with the literature.<sup>16</sup>

### 6-Methoxy-2-naphthaldehyde (2o)

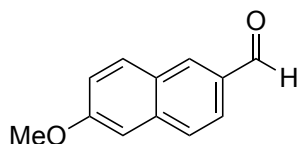

The reaction was carried out using **PC3** instead of **PC6**. The product was purified by flash chromatography on silica gel (97:3–90:10, hexane/EtOAc) to afford **2o** (Figure 3B; 43.6 mg, 0.18 mmol, 93% isolated yield) as a light brown solid.

<sup>1</sup>H NMR (400 MHz, CDCl<sub>3</sub>) δ 10.10 (s, 1H), 8.26 (s, 1H), 7.93 (dd, *J* = 8.4, 1.6 Hz, 1H), 7.90 (d, *J* = 8.8 Hz, 1H), 7.81 (d, *J* = 8.4 Hz, 1H), 7.24 (dd, *J* = 8.8, 2.4 Hz, 1H), 7.19 (d, *J* = 2.4 Hz, 1H), 3.97 (s, 3H).

<sup>13</sup>C NMR (100.6 MHz, CDCl<sub>3</sub>) δ 192.0, 160.3, 138.3, 134.2, 132.4, 131.1, 128.0, 127.7, 123.7, 120.0, 106.1, 55.5.

The <sup>1</sup>H and <sup>13</sup>C NMR spectra data of **2o** were consistent with the literature.<sup>17</sup>

### 4-Hexylbenzaldehyde (2p)

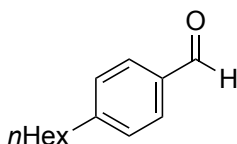

The reaction was carried out using **PC3** (10 mol %) instead of **PC6**. The product was purified by flash chromatography on silica gel (100:0–93:7, hexane/EtOAc) to afford **2p** (Figure 3B; 18.3 mg, 0.096 mmol, 48% isolated yield) as a colorless oil.

<sup>1</sup>H NMR (400 MHz, CDCl<sub>3</sub>) δ 9.97 (s, 1H), 7.80 (d, *J* = 8.0 Hz, 2H), 7.34 (d, *J* = 8.0 Hz, 2H), 2.68 (t, *J* = 7.6 Hz, 2H), 1.64 (tt, *J* = 7.6, 7.6 Hz, 2H), 1.37–1.28 (m, 6H), 0.88 (t, *J* = 7.2 Hz, 3H).

<sup>13</sup>C NMR (100.6 MHz, CDCl<sub>3</sub>) δ 192.0, 150.5, 134.4, 129.9 (2C), 129.1 (2C), 36.2, 31.6, 31.0, 28.9, 22.5, 14.0.

The  $^1\text{H}$  and  $^{13}\text{C}$  NMR spectra data of **2p** were consistent with the literature.<sup>18</sup>

### 2-Naphthaldehyde (**2q**)

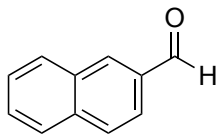

The reaction was carried out using **PC3** instead of **PC6**. The product was purified by flash chromatography on silica gel (100:0–96:4, hexane/EtOAc) to afford **2q** (Figure 3B; 25.3 mg, 0.16 mmol, 81% isolated yield) as a light brown solid.

$^1\text{H}$  NMR (400 MHz,  $\text{CDCl}_3$ )  $\delta$  10.17 (s, 1H), 8.35 (s, 1H), 8.03–7.91 (m, 4H), 7.66 (t,  $J = 7.2$  Hz, 1H), 7.60 (t,  $J = 7.2$  Hz, 1H).

$^{13}\text{C}$  NMR (100.6 MHz,  $\text{CDCl}_3$ )  $\delta$  192.3, 136.5, 134.5, 134.1, 132.6, 129.5, 129.1 (2C), 128.1, 127.1, 122.8.

The  $^1\text{H}$  and  $^{13}\text{C}$  NMR spectra data of **2q** were consistent with the literature.<sup>16</sup>

### 1-(Benzyloxy)-4-methylbenzene (**2r**)

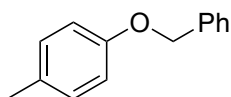

The reaction was carried out using **PC3** (10 mol %) instead of **PC6** and 6 h. The product was purified by flash chromatography on silica gel (100:0–95:5, hexane/EtOAc) to afford **2r** (Figure 3B; 14.1 mg, 0.071 mmol, 36% isolated yield) as a pale-yellow solid.

$^1\text{H}$  NMR (400 MHz,  $\text{CDCl}_3$ )  $\delta$  7.44–7.42 (m, 2H), 7.40–7.36 (m, 2H), 7.31 (m, 1H), 7.08 (d,  $J = 8.4$  Hz, 2H), 6.89–6.86 (m, 2H), 5.04 (s, 2H), 2.29 (s, 3H).

$^{13}\text{C}$  NMR (100.6 MHz,  $\text{CDCl}_3$ )  $\delta$  156.7, 137.2, 130.1 (2C), 129.9 (2C), 128.5, 127.8, 127.4 (2C), 114.7(2C), 70.1, 20.5.

The  $^1\text{H}$  and  $^{13}\text{C}$  NMR spectra data of **2r** were consistent with the literature.<sup>19</sup>



## 8. Optimization for Giese Addition

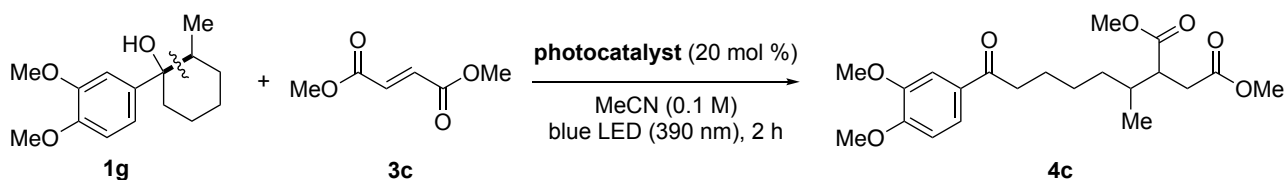

| Entry <sup>a</sup> | photocatalyst | yield (%) <sup>b</sup> |
|--------------------|---------------|------------------------|
| 1                  | <b>PC2</b>    | 71                     |
| 2                  | <b>PC3</b>    | 28                     |
| 3                  | <b>PC6</b>    | 59                     |

<sup>a</sup> Reaction was carried out with **1g** (0.1 mmol), **3c** (0.2 mmol) and photocatalyst (20  $\mu$ mol) in MeCN (1 mL) under 390 nm blue LED (Kessil lamp) irradiation at ambient temperature for 2 h. <sup>b</sup> <sup>1</sup>H NMR yield.

**Table S4.** Effect of Photocatalyst

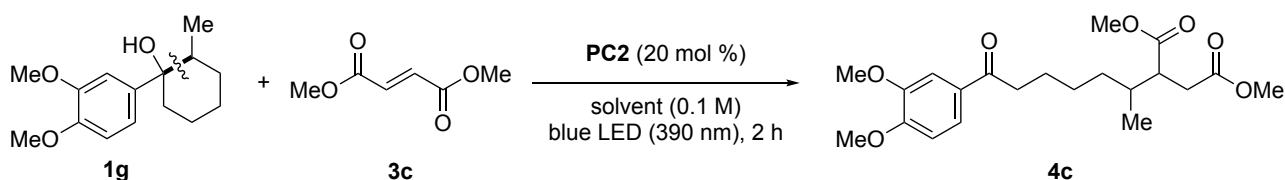

| Entry <sup>a</sup> | solvent                         | yield (%) <sup>b</sup> |
|--------------------|---------------------------------|------------------------|
| 1                  | MeCN                            | 71                     |
| 2                  | CH <sub>2</sub> Cl <sub>2</sub> | 52                     |
| 3                  | AcOEt                           | 53                     |
| 4                  | MeCN : MeOH<br>(9:1)            | 41                     |

<sup>a</sup> Reaction was carried out with **1g** (0.1 mmol), **3c** (0.2 mmol) and **PC2** (20  $\mu$ mol) in solvent (1 mL) under 390 nm blue LED (Kessil lamp) irradiation at ambient temperature for 2 h. <sup>b</sup> <sup>1</sup>H NMR yield.

**Table S5.** Effect of Solvent

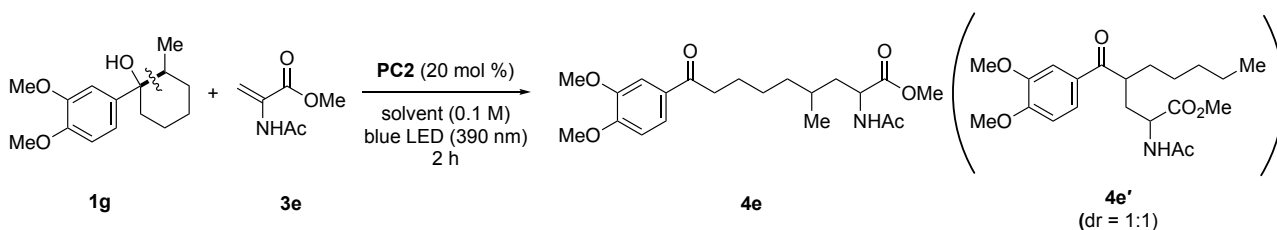

| Entry <sup>a</sup> | <b>1g</b> (mmol) | <b>3e</b> (mmol) | solvent              | yield (%) <sup>b</sup> |
|--------------------|------------------|------------------|----------------------|------------------------|
| 1                  | 0.2              | 0.4              | MeCN                 | 10                     |
| 2                  | 0.3              | 0.2              | MeCN : MeOH<br>(9:1) | 76(77) <sup>c</sup>    |

<sup>a</sup> Reaction was carried out with **1g**, **3e** and **PC2** (20  $\mu$ mol) in solvent (1 mL) under 390 nm blue LED (Kessil lamp) irradiation at ambient temperature for 2 h.

<sup>b</sup> <sup>1</sup>H NMR combined yield of **4e** and **4e'**. <sup>c</sup> Isolated yield.

**Table S6.** Effect of Substrate Ratio

## 9. Procedure for Giese Addition

The reaction of **4a** in Figure 3C is representative.

In a glovebox, a vial equipped with a stirring bar was charged with photoredox catalyst **PC2** (8.5 mg, 0.04 mmol), benzyl alcohol **1g** (75.1 mg, 0.3 mmol), alkene **3a** (21.8  $\mu$ L, 0.2 mmol), and MeCN/MeOH (9:1) (2.0 mL). After sealing the vial with a cap and removing it from the glovebox, the reaction was stirred and irradiated with a 390 nm blue LED placed 0.5 cm away, with a cooling fan to keep the temperature below 50 °C (Figure S4). After 2 h, the solvent was evaporated from the reaction solution, and purification by flash column chromatography on silica gel (95:5–85:15, hexane/EtOAc), which gave **4a** (23.9 mg, 0.068 mmol, 34% isolated yield) as a colorless oil.

## 10. Characterization Data for Products of Giese Addition

### Ethyl 9-(3,4-dimethoxyphenyl)-4-methyl-9-oxononanoate (**4a**)

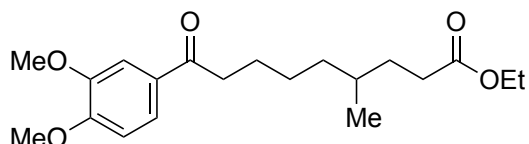

**IR** (neat) 2932, 1731, 1675, 1586, 1515, 1464, 1416, 1260, 1149, 1023  $\text{cm}^{-1}$ .

**$^1\text{H}$  NMR** (400 MHz,  $\text{CDCl}_3$ )  $\delta$  7.59 (dd,  $J = 8.4, 2.0$  Hz, 1H), 7.54 (d,  $J = 2.0$  Hz, 1H), 6.89 (d,  $J = 8.4$  Hz, 1H), 4.12 (q,  $J = 7.2$  Hz, 2H), 3.95 (s, 3H), 3.94 (s, 3H), 2.92 (t,  $J = 7.6$  Hz, 2H), 2.37–2.22 (m, 2H), 1.75–1.64 (m, 4H), 1.47–1.32 (m, 4H), 1.29–1.17 (m, 4H), 0.88 (d,  $J = 6.4$  Hz, 3H).

**$^{13}\text{C}$  NMR** (100.6 MHz,  $\text{CDCl}_3$ )  $\delta$  199.1, 174.1, 153.1, 149.0, 130.3, 122.7, 110.2, 109.9, 60.2, 56.04, 55.96, 38.1, 36.5, 32.3, 32.1, 31.8, 26.7, 24.9, 19.2, 14.2.

**HRMS–ESI** ( $m/z$ ):  $[\text{M}+\text{H}]^+$  calcd for  $\text{C}_{20}\text{H}_{31}\text{O}_5^+$ , 351.2166; found, 351.2151.

### 1-(3,4-Dimethoxyphenyl)-6-methyl-8-(phenylsulfonyl)octan-1-one (**4b**)

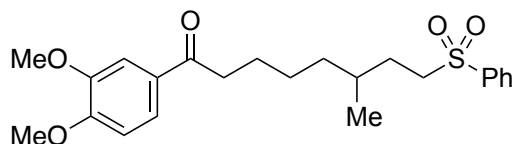

The product was purified by flash chromatography on silica gel (90:10–60:40, hexane/EtOAc) to afford **4b** (Figure 3C; 31.0 mg, 0.074 mmol, 37% isolated yield) as a pale-yellow oil.

**IR** (neat) 2933, 1672, 1586, 1514, 1446, 1418, 1306, 1260, 1143, 1086  $\text{cm}^{-1}$ .

**$^1\text{H}$  NMR** (400 MHz,  $\text{CDCl}_3$ )  $\delta$  7.93–7.90 (m, 2H), 7.66 (m, 1H), 7.60–7.55 (m, 3H), 7.53 (d,  $J = 2.0$  Hz, 1H), 6.89 (d,  $J = 8.4$  Hz, 1H), 3.95 (s, 3H), 3.94 (s, 3H), 3.18–3.01 (m, 2H), 2.90 (t,  $J = 7.2$  Hz, 2H), 1.79–1.64 (m, 3H), 1.59–1.49 (m, 2H), 1.39–1.24 (m, 3H), 1.18 (m, 1H), 0.85 (d,  $J = 6.4$  Hz, 3H).

$^{13}\text{C}$  NMR (100.6 MHz,  $\text{CDCl}_3$ )  $\delta$  198.9, 153.2, 149.0, 139.2, 133.6, 130.2, 129.2 (2C), 128.0 (2C), 122.6, 110.1, 110.0, 56.03, 55.96, 54.4, 37.9, 36.2, 31.8, 29.1, 26.5, 24.7, 19.1.

HRMS–ESI (m/z):  $[\text{M}+\text{H}]^+$  calcd for  $\text{C}_{23}\text{H}_{31}\text{SO}_5^+$ , 419.1887; found, 419.1870.

#### Dimethyl 2-(7-(3,4-dimethoxyphenyl)-7-oxoheptan-2-yl)succinate (4c)

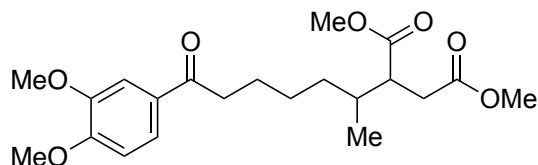

The reaction was carried out using **1g** (50.1 mg, 0.2 mmol), **3c** (57.7 mg, 0.4 mmol), MeCN (2.0 ml). The product was purified by flash chromatography on silica gel (85:15–70:30, hexane/EtOAc) to afford **4c** (Figure 3C; 44.4 mg, 0.11 mmol, 56% isolated yield) as a pale-yellow oil. The ratio (1.2:1) of the diastereomers was determined by  $^1\text{H}$  NMR analysis.

IR (neat) 2937, 1731, 1672, 1514, 1436, 1416, 1260, 1151, 1021, 750  $\text{cm}^{-1}$ .

$^1\text{H}$  NMR (400 MHz,  $\text{CDCl}_3$ )  $\delta$  7.58 (dd,  $J = 8.4, 2.0$  Hz, 1H), 7.53 (d,  $J = 2.0$  Hz, 1H), 6.89 (d,  $J = 8.4$  Hz, 1H), 3.95 (s, 3H), 3.94 (s, 3H), 3.692–3.687 (m, 3H), 3.674–3.671 (m, 3H), 2.94–2.85 (m, 3H), 2.75 (m, 1H), 2.35 (td,  $J = 25.2, 4.0$  Hz, 1H), 1.94 (m,  $0.55 \times 1\text{H}$ ), 1.80 (m,  $0.45 \times 1\text{H}$ ), 1.76–1.67 (m, 2H), 1.50–1.17 (m, 4H), 0.91 (d,  $J = 6.8$  Hz,  $0.45 \times 3\text{H}$ ), 0.87 (d,  $J = 6.8$  Hz,  $0.55 \times 3\text{H}$ ).

$^{13}\text{C}$  NMR (100.6 MHz,  $\text{CDCl}_3$ )  $\delta$  198.92, 198.87, 175.0, 174.5, 173.1, 172.9, 153.1, 149.0, 130.3, 122.6, 110.1, 109.9, 56.05, 55.96, 51.78, 51.76, 51.7, 51.6, 45.9, 45.7, 37.9, 35.0, 34.5, 34.2, 33.8, 33.3, 31.4, 27.0, 26.9, 24.62, 24.59, 16.8, 16.2 (only observed peaks).

HRMS–ESI (m/z):  $[\text{M}+\text{H}]^+$  calcd for  $\text{C}_{21}\text{H}_{31}\text{O}_7^+$ , 395.2064; found, 395.2056.

#### 2-(8-(3,4-Dimethoxyphenyl)-3-methyl-8-oxo-1-phenyloctyl)malononitrile (4d)

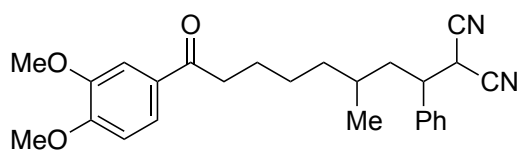

The product was purified by flash chromatography on silica gel (95:5–70:30, hexane/EtOAc) to afford **4d** (Figure 3C; 41.9 mg, 0.10 mmol, 52% isolated yield) as a pale-yellow oil. The ratio (1:1) of the diastereomers was determined by  $^1\text{H}$  NMR analysis.

IR (neat) 2937, 1670, 1514, 1418, 1261, 1149, 1021, 748, 706, 668  $\text{cm}^{-1}$ .

$^1\text{H}$  NMR (400 MHz,  $\text{CDCl}_3$ )  $\delta$  7.59 (dd,  $J = 8.4, 2.0$  Hz,  $0.5 \times 1\text{H}$ ), 7.55–7.48 (m,  $0.5 \times 3\text{H}$ ), 7.42–7.37 (m, 3H), 7.34–7.27 (m, 2H), 6.90 (d,  $J = 8.4$  Hz,  $0.5 \times 1\text{H}$ ), 6.87 (d,  $J = 8.4$  Hz,  $0.5 \times 1\text{H}$ ), 4.22 (dd,  $J = 6.8, 0.4$  Hz,  $0.5 \times 1\text{H}$ ), 4.18 (d,  $J = 5.2$  Hz,  $0.5 \times 1\text{H}$ ), 3.96–3.93 (m, 6H), 3.03 (dd,  $J = 8.4, 6.8$  Hz,  $0.5 \times 1\text{H}$ ), 2.98 (dd,  $J = 7.2, 2.0$  Hz, 1H), 2.91 (dd,  $J = 10.0, 5.2$  Hz,  $0.5 \times 1\text{H}$ ), 2.81 (t,  $J = 2.8$  Hz, 1H), 2.25 (m, 1H), 1.78 (m, 1H), 1.67–1.36 (m, 4H), 1.28 (m, 1H), 1.14 (d,  $J = 6.8$  Hz,  $0.5 \times 3\text{H}$ ), 0.82 (d,  $J = 6.8$  Hz,  $0.5 \times 3\text{H}$ ).

$^{13}\text{C}$  NMR (100.6 MHz,  $\text{CDCl}_3$ )  $\delta$  198.70, 198.66, 153.23, 153.16, 149.1, 149.0, 136.6, 136.1, 130.1, 129.2, 129.1, 128.8, 128.7, 128.4, 128.2, 122.7, 122.6, 112.2, 112.1, 112.0, 111.8, 110.1, 110.03, 109.96, 109.89, 56.06, 56.05, 55.98, 55.96, 52.2, 51.4, 37.63, 37.60, 34.6, 34.1, 33.3, 27.8, 27.4, 26.00, 25.95, 24.5, 24.3, 17.4, 16.3 (only observed peaks).

HRMS-ESI (m/z):  $[\text{M}+\text{H}]^+$  calcd for  $\text{C}_{25}\text{H}_{29}\text{N}_2\text{O}_3^+$ , 405.2173; found, 405.2172.

#### Methyl 2-acetamido-9-(3,4-dimethoxyphenyl)-4-methyl-9-oxononanoate (4e)

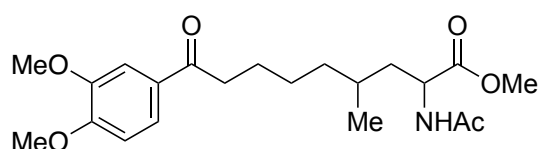

The product was purified by flash chromatography on silica gel (60:40–40:60, hexane/EtOAc) to afford **4e** and **4e'** (Figure 3C; 60.4 mg, 0.15 mmol, 77% isolated yield). **4e** and **4e'** were separated by GPC ( $\text{CHCl}_3$ ). Colorless oil. The ratio (1.8:1) of **4e**:**4e'** and the diastereomer ratio of **4e** (1:1) were determined by  $^1\text{H}$  NMR analysis.

IR (neat) 3365, 2936, 1744, 1655, 1586, 1515, 1418, 1737, 1260, 1148  $\text{cm}^{-1}$ .

$^1\text{H}$  NMR (400 MHz,  $\text{CDCl}_3$ )  $\delta$  7.60 (m, 1H), 7.53 (d,  $J = 2.0$  Hz, 1H), 6.89 (d,  $J = 8.4$  Hz, 1H), 5.96 (d,  $J = 8.4$  Hz,  $0.6 \times 1\text{H}$ ), 5.87 (d,  $J = 8.0$  Hz,  $0.4 \times 1\text{H}$ ), 4.66 (m, 1H), 3.95–3.94 (m, 6H), 3.734 (s,  $0.4 \times 3\text{H}$ ), 3.730 (s,  $0.6 \times 3\text{H}$ ), 2.95–2.91 (m, 2H), 2.03 (s,  $0.6 \times 3\text{H}$ ), 2.01 (s,  $0.4 \times 3\text{H}$ ), 1.78–1.65 (m, 2H), 1.59–1.13 (m, 7H), 0.96–0.92 (m, 3H).

$^{13}\text{C}$  NMR (100.6 MHz,  $\text{CDCl}_3$ )  $\delta$  199.10, 199.07, 173.7, 173.6, 170.0, 169.7, 153.2, 153.1, 149.04, 149.01, 130.30, 130.278, 122.68, 122.66, 110.2, 110.1, 110.0, 56.1, 56.0, 52.3, 50.6, 50.5, 40.1, 39.7, 37.94, 38.87, 36.8, 36.0, 29.4, 29.2, 26.5, 26.4, 24.7, 24.4, 23.2, 23.1, 19.7, 19.3 (only observed peaks).

HRMS-ESI (m/z):  $[\text{M}+\text{H}]^+$  calcd for  $\text{C}_{21}\text{H}_{32}\text{NO}_6^+$ , 394.2224; found, 394.2210.

#### Methyl 2-acetamido-4-(3,4-dimethoxybenzoyl)nonanoate (4e')

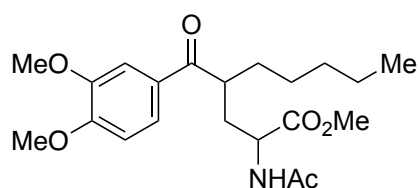

Colorless oil. The diastereomer ratio of **4e'** (1:1) was determined by  $^1\text{H}$  NMR analysis.

IR (neat) 3283, 2932, 1744, 1659, 1584, 1514, 1419, 1375, 1261, 1021  $\text{cm}^{-1}$ .

$^1\text{H}$  NMR (400 MHz,  $\text{CDCl}_3$ )  $\delta$  7.58–7.52 (m, 2H), 6.93–6.90 (m, 1H), 6.07 (d,  $J = 7.6$  Hz,  $0.77 \times 1\text{H}$ ), 5.69 (d,  $J = 9.2$  Hz,  $0.23 \times 1\text{H}$ ), 4.67 (m,  $0.23 \times 1\text{H}$ ), 4.54 (td,  $J = 7.6, 6.4$  Hz,  $0.77 \times 1\text{H}$ ), 3.96 (s, 3H), 3.94 (s, 3H), 3.72 (s,  $0.23 \times 3\text{H}$ ), 3.62 (s,  $0.77 \times 3\text{H}$ ), 3.50 (m, 1H), 2.50 (m,  $0.77 \times 1\text{H}$ ), 2.35 (m,  $0.23 \times 1\text{H}$ ), 2.06 (m,  $0.23 \times 1\text{H}$ ), 1.94 (s,  $0.77 \times 3\text{H}$ ), 1.83 (m,  $0.77 \times 1\text{H}$ ), 1.69 (m, 1H), 1.62 (s,  $0.23 \times 3\text{H}$ ), 1.45 (m, 1H), 1.22 (m, 6H), 0.85–0.82 (m, 3H).

$^{13}\text{C}$  NMR (100.6 MHz,  $\text{CDCl}_3$ )  $\delta$  202.5, 201.3, 172.8, 172.5, 170.0, 169.6, 153.3, 149.1, 129.8, 122.9, 122.7, 110.5, 110.3, 110.1, 56.04, 55.96, 52.4, 52.3, 51.6, 51.4, 43.0, 42.3, 34.1, 34.0, 33.6, 31.80, 31.76, 26.7, 23.1, 22.8, 22.4, 14.0 (only observed peaks).

HRMS–ESI (m/z):  $[\text{M}+\text{H}]^+$  calcd for  $\text{C}_{21}\text{H}_{32}\text{NO}_6^+$ , 394.2224; found, 394.2209.

#### Methyl 2-acetamido-4,4-dimethylpentanoate (**4f**)

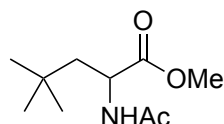

The product was purified by flash chromatography on silica gel (EtOAc) followed by GPC ( $\text{CHCl}_3$ ) to afford **4f** (Figure 3C; 39.4 mg, 0.20 mmol, 98% isolated yield) as a colorless oil.

$^1\text{H}$  NMR (400 MHz,  $\text{CDCl}_3$ )  $\delta$  5.79 (brs, 1H), 4.65 (td,  $J = 13.2, 4.0$  Hz, 1H), 3.72 (s, 3H), 2.00 (s, 3H), 1.76 (dd,  $J = 14.4, 4.0$  Hz, 1H), 1.47 (dd,  $J = 14.4, 8.8$  Hz, 1H), 0.96 (s, 9H).

$^{13}\text{C}$  NMR (100.6 MHz,  $\text{CDCl}_3$ )  $\delta$  174.1, 169.5, 52.3, 49.8, 46.2, 30.7, 29.5 (3C), 23.2.

The  $^1\text{H}$  and  $^{13}\text{C}$  NMR spectra data of **4f** were consistent with the literature.<sup>20</sup>

#### Methyl 2-acetamido-3-cyclohexylpropanoate (**4g**)

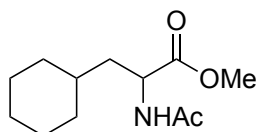

The product **4g** was purified by flash chromatography on silica gel (40:60 hexane/EtOAc) followed by GPC ( $\text{CHCl}_3$ ) to afford **4g** (Figure 3C; 37.7 mg, 0.17 mmol, 83% isolated yield) as a colorless oil.

IR (neat) 2923, 1744, 1652, 1541, 1436, 1373, 1261, 1201, 1153, 1008  $\text{cm}^{-1}$ .

$^1\text{H}$  NMR (400 MHz,  $\text{CDCl}_3$ )  $\delta$  5.91 (brs, 1H), 4.66 (dt,  $J = 5.2, 8.8$  Hz, 1H), 3.73 (s, 3H), 2.03 (s, 3H), 1.79 (m, 1H), 1.71–1.63 (m, 5H), 1.51 (m, 1H), 1.37–1.08 (m, 4H), 1.00–0.85 (m, 2H).

$^{13}\text{C}$  NMR (100.6 MHz,  $\text{CDCl}_3$ ) (100.6 MHz,  $\text{CDCl}_3$ )  $\delta$  173.8, 169.8, 52.2, 50.1, 40.2, 34.1, 33.4, 32.5, 26.3, 26.1, 25.9, 23.1.

HRMS–ESI (m/z):  $[\text{M}+\text{H}]^+$  calcd for  $\text{C}_{12}\text{H}_{22}\text{NO}_3^+$ , 228.1594; found, 228.1585.

#### Methyl *N*-acetyl-*O*-phenylhomoserinate (**4h**)

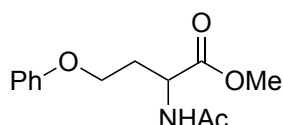

The product was purified by flash chromatography on silica gel (70:30–50:50, hexane/EtOAc) to afford **4h** (Figure 3C; 21.7 mg, 0.086 mmol, 47% isolated yield) as a white solid.

M.p. 105–110  $^{\circ}\text{C}$ .

IR (neat) 3281, 1741, 1652, 1599, 1541, 1497, 1436, 1373, 1240, 1148  $\text{cm}^{-1}$ .

**<sup>1</sup>H NMR** (400 MHz, CDCl<sub>3</sub>) δ 7.30–7.28 (m, 2H), 6.96 (t, *J* = 7.2 Hz, 1H), 6.85 (dd, *J* = 8.8, 0.8 Hz, 2H), 6.34 (d, *J* = 4.4 Hz, 1H), 4.76 (dt, *J* = 7.2, 4.4 Hz, 1H), 4.08–3.99 (m, 2H), 3.76 (s, 3H), 2.42–2.28 (m, 2H), 2.03 (s, 3H).

**<sup>13</sup>C NMR** (100.6 MHz, CDCl<sub>3</sub>) δ 172.5, 169.9, 158.2, 129.5 (2C), 121.1, 114.4 (2C), 64.0, 52.5, 50.4, 31.2, 23.2.

**HRMS–ESI** (*m/z*): [M+H]<sup>+</sup> calcd for C<sub>13</sub>H<sub>18</sub>NO<sub>4</sub><sup>+</sup>, 252.1230; found, 252.1218.

#### Methyl *N*-acetyl-*S*-phenylhomocysteinate (**4i**)

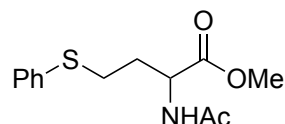

The product was purified by flash chromatography on silica gel (70:30–50:50, hexane/EtOAc) to afford **4i** (Figure 3C; 18.0 mg, 0.067 mmol, 34% isolated yield) as a white solid.

**M.p.** 111–116 °C.

**IR** (neat) 3260, 1745, 1637, 1556, 1481, 1438, 1369, 1301, 1230, 1212 cm<sup>-1</sup>.

**<sup>1</sup>H NMR** (400 MHz, CDCl<sub>3</sub>) δ 7.34–7.27 (m, 4H), 7.20 (m, 1H), 6.11 (s, 1H), 4.73 (dt, *J* = 7.6, 5.2 Hz, 1H), 3.74 (s, 3H), 2.99–2.87 (m, 2H), 2.19 (m, 1H), 2.03 (s, 3H), 1.98 (m, 1H).

**<sup>13</sup>C NMR** (100.6 MHz, CDCl<sub>3</sub>) δ 172.4, 169.9, 135.5, 129.6 (2C), 129.0 (2C), 126.4, 52.6, 51.5, 32.1, 29.8, 23.2.

**HRMS–ESI** (*m/z*): [M+H]<sup>+</sup> calcd for C<sub>13</sub>H<sub>18</sub>NO<sub>3</sub>S<sup>+</sup>, 268.1002; found, 268.0991.

#### Methyl 2-acetamido-9-(3,4-dimethoxyphenyl)-9-oxononanoate (**4j**)

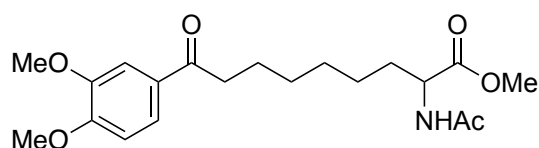

The product was purified by flash chromatography on silica gel (60:40–40:60, hexane/EtOAc) to afford **4j** and **4j'** (Figure 3C; 30.1 mg, 0.079 mmol, 40% isolated yield). **4j** and **4j'** were separated by GPC (CHCl<sub>3</sub>). colorless oil. The ratio (1:1.9) of **4j**:**4j'** was determined by <sup>1</sup>H NMR analysis.

**IR** (neat) 2934, 1744, 1656, 1586, 1514, 1464, 1418, 1261, 1204, 1149 cm<sup>-1</sup>.

**<sup>1</sup>H NMR** (400 MHz, CDCl<sub>3</sub>) δ 7.58 (dd, *J* = 8.4, 2.0 Hz, 1H), 7.53 (d, *J* = 2.0 Hz, 1H), 6.89 (d, *J* = 8.4 Hz, 1H), 5.97 (d, *J* = 8.0 Hz, 1H), 4.61 (dt, *J* = 8.0, 5.2 Hz, 1H), 3.95 (s, 3H), 3.94 (s, 3H), 3.74 (s, 3H), 2.91 (t, *J* = 7.2 Hz, 2H), 2.03 (s, 3H), 1.83 (m, 1H), 1.73–1.62 (m, 3H), 1.36–1.26 (m, 6H).

**<sup>13</sup>C NMR** (100.6 MHz, CDCl<sub>3</sub>) δ 199.1, 173.2, 169.7, 153.1, 149.0, 130.3, 122.7, 110.1, 109.9, 56.05, 55.97, 52.3, 52.1, 37.9, 32.4, 29.04, 28.98, 24.9, 24.4, 23.2.

**HRMS–ESI** (*m/z*): [M+H]<sup>+</sup> calcd for C<sub>20</sub>H<sub>30</sub>NO<sub>6</sub><sup>+</sup>, 380.2068; found, 380.2053.

#### Methyl 2-acetamido-4-(3,4-dimethoxybenzoyl)octanoate (**4j'**)

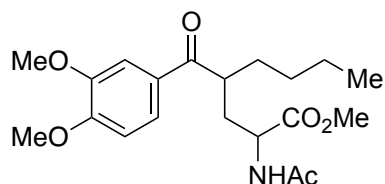

Colorless oil. The ratio (1.3:1) of the diastereomers was determined by  $^1\text{H}$  NMR analysis.

**IR** (neat) 2933, 1744, 1655, 1584, 1512, 1438, 1419, 1375, 1261, 1212  $\text{cm}^{-1}$ .

**$^1\text{H}$  NMR** (400 MHz,  $\text{CDCl}_3$ )  $\delta$  7.58–7.53 (m, 2H), 6.91 (dd,  $J = 8.4, 2.4$  Hz, 1H), 6.09 (m,  $0.6 \times 1\text{H}$ ), 5.71 (m,  $0.4 \times 1\text{H}$ ), 4.69 (m,  $0.4 \times 1\text{H}$ ), 4.54 (td,  $J = 10.8, 7.2$  Hz,  $0.6 \times 1\text{H}$ ), 3.96 (s, 3H), 3.94 (s, 3H), 3.72 (s,  $0.4 \times 3\text{H}$ ), 3.62 (s,  $0.6 \times 3\text{H}$ ), 3.49 (m, 1H), 2.50 (m,  $0.6 \times 1\text{H}$ ), 2.35 (m,  $0.4 \times 1\text{H}$ ), 2.06 (m,  $0.4 \times 1\text{H}$ ), 1.94 (s,  $0.6 \times 3\text{H}$ ), 1.84 (m,  $0.6 \times 1\text{H}$ ), 1.68 (m, 1H), 1.62 (s,  $0.4 \times 3\text{H}$ ), 1.48 (m, 1H), 1.25 (brs, 4H), 0.84 (t,  $J = 6.4$  Hz, 3H).

**$^{13}\text{C}$  NMR** (100.6 MHz,  $\text{CDCl}_3$ )  $\delta$  202.5, 201.3, 172.8, 172.5, 170.0, 169.6, 153.4, 153.3, 149.12, 149.11, 129.81, 129.80, 122.9, 122.7, 110.5, 110.3, 110.1, 56.05, 56.03, 55.9, 52.4, 52.3, 51.6, 51.4, 42.9, 42.3, 34.1, 34.0, 33.7, 33.4, 29.2, 23.1, 22.8, 22.71, 22.66, 13.82, 13.80 (only observed peaks).

**HRMS-ESI** ( $m/z$ ):  $[\text{M}+\text{H}]^+$  calcd for  $\text{C}_{20}\text{H}_{30}\text{NO}_6^+$ , 380.2068; found, 380.2060.

## 11. Minisci Reaction

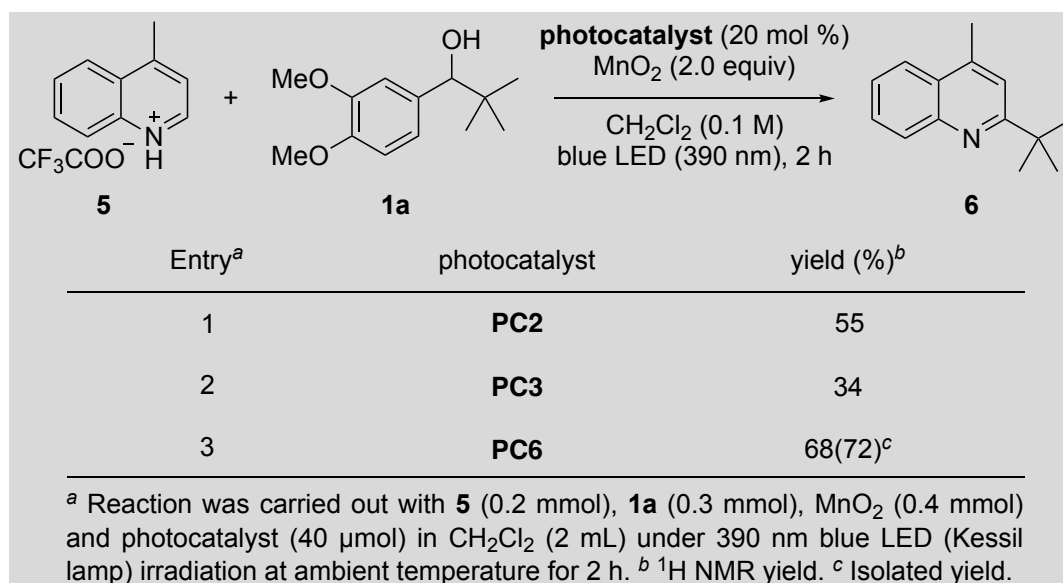

**Table S7.** Optimization of reaction conditions

To a screw-top 4 mL vial with a stirring bar was added lepidine (28.6 mg, 0.2 mmol), MeOH (1.0 mL) and trifluoroacetic acid (34.2 mg, 0.3 mmol). The mixture was stirred for 30 min. Then, the solvent was under reduced pressure. In a glovebox, a vial equipped with a stirring bar was charged with photoredox catalyst **PC** (40 μmol), benzyl alcohol **1a** (67.3 mg, 0.3 mmol), MnO<sub>2</sub> (34.8 mg, 0.4 mmol), and CH<sub>2</sub>Cl<sub>2</sub> (2.0 mL). After removing the vial from the glovebox, the reaction was stirred and irradiated with a 390 nm blue LED placed 0.5 cm away, with a cooling fan to keep the temperature below 50 °C. After stirring for 2 h, the reaction was quenched with saturated K<sub>2</sub>CO<sub>3</sub> aq (5 mL) and Na<sub>2</sub>S<sub>2</sub>O<sub>3</sub> aq (5 mL) and extracted with diethyl ether (5 mL × 3). The combined organic layers were dried over Na<sub>2</sub>SO<sub>4</sub>, filtered, and concentrated under reduced pressure. The residue was purified by flash column chromatography on silica gel (100:0–95:5, hexane/Et<sub>2</sub>O) gave **6** (28.5 mg, 0.143 mmol, 72% isolated yield) as a colorless oil.

<sup>1</sup>H NMR (400 MHz, CDCl<sub>3</sub>) δ 8.06 (d, *J* = 8.4 Hz, 1H), 7.94 (d, *J* = 8.4 Hz, 1H), 7.66 (t, *J* = 7.6 Hz, 1H), 7.49 (t, *J* = 7.6 Hz, 1H), 7.35 (s, 1H), 2.69 (s, 3H), 1.46 (s, 9H).

<sup>13</sup>C NMR (100,6 MHz, CDCl<sub>3</sub>) δ 168.9, 147.2, 143.6, 129.9, 128.7, 126.5, 125.4, 123.4, 118.9, 37.9, 30.1 (3C), 19.0.

The <sup>1</sup>H and <sup>13</sup>C NMR spectra data of **6** were consistent with the literature.<sup>21</sup>



## 12. Procedure for Additive Effect

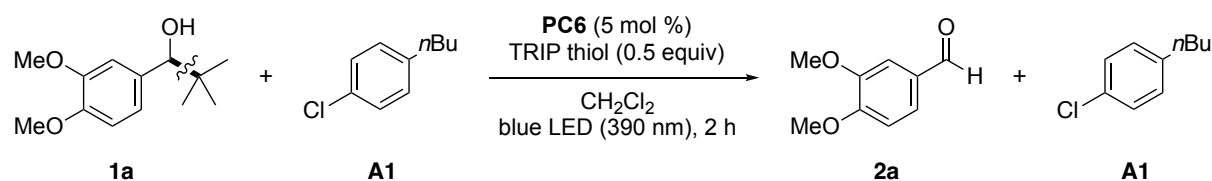

**(Supplementary Fig. 4).** In a glovebox, a vial equipped with a stirring bar was charged with photoredox catalyst **PC6** (2.3 mg, 0.005 mmol), benzyl alcohol **1a** (22.4 mg, 0.1 mmol), TRIP thiol (12.6  $\mu\text{L}$ , 0.05 mmol), additive **A1** (16.6 mg, 0.98 mmol), and  $\text{CH}_2\text{Cl}_2$  (1.0 mL). After sealing the vial with a cap and removing it from the glovebox, the reaction was stirred and irradiated with a 390 nm blue LED placed 0.5 cm away, with a cooling fan to keep the temperature below 50  $^\circ\text{C}$  (Figure S4). After 2 h, the solvent was removed under reduced pressure, the residue was dissolved in  $\text{CDCl}_3$  (500  $\mu\text{L}$ ), and 1,1,2,2-tetrachloroethane (17.5 mg, 10.4  $\mu\text{mol}$ ) was added as an internal standard.  $^1\text{H}$  NMR (400 MHz) yields of **2a** (90%) and **A1** (quantitative) were determined by comparing the relative integration values of the singlet peak observed at 9.86 ppm of **2a** and the triplet peak observed at 2.57 ppm of **A1** to that of 1,1,2,2-tetrachloroethane observed at 5.96 ppm. Results are summarized in Table S7.

| Entry | 2a (%) | Additive remaining (%) | Note | Entry | 2a (%) | Additive remaining (%) | Note                                                    |
|-------|--------|------------------------|------|-------|--------|------------------------|---------------------------------------------------------|
| A1    | 90     | >99                    |      | A14   | 51     | 0                      | celite short pass with $\text{CH}_2\text{Cl}_2$ .       |
| A2    | 95     | >99                    |      | A15   | 89     | >99                    |                                                         |
| A3    | 91     | >99                    |      | A16   | 87     | 99                     |                                                         |
| A4    | 88     | 98                     |      | A17   | 84     | >99                    | 1,2-dibromoethane instead of 1,1,2,2-tetrachloroethane. |
| A5    | 88     | 70                     |      | A18   | 53     | 77                     |                                                         |
| A6    | 96     | >99                    |      | A19   | 89     | >99                    |                                                         |
| A7    | 92     | >99                    |      | A20   | 73     | 91                     |                                                         |
| A8    | 83     | >99                    |      | A21   | 94     | >99                    |                                                         |
| A9    | 88     | >99                    |      | A22   | 91     | >99                    |                                                         |
| A10   | 90     | >99                    |      | A23   | 67     | 84                     |                                                         |
| A11   | 94     | >99                    |      | A24   | 58     | 90                     |                                                         |
| A12   | 94     | >99                    |      | A25   | 76     | >99                    |                                                         |
| A13   | 68     | 78                     |      | A26   | 96     | 33                     |                                                         |

**Table S8.** Result on Additive Effect

### 13. UV/Vis Spectra of Photocatalysts

UV-Vis absorption spectra of organophotocatalysts were measured with 200  $\mu$ M acetonitrile solution.

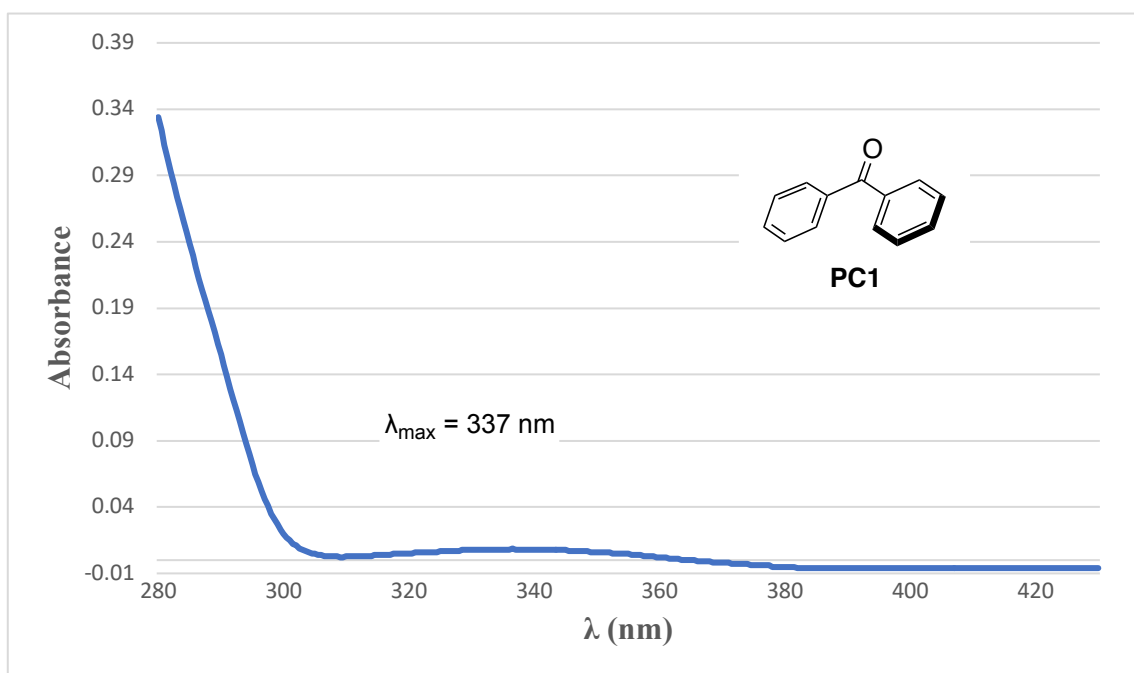

Figure S5. UV-Vis spectrum of PC1.

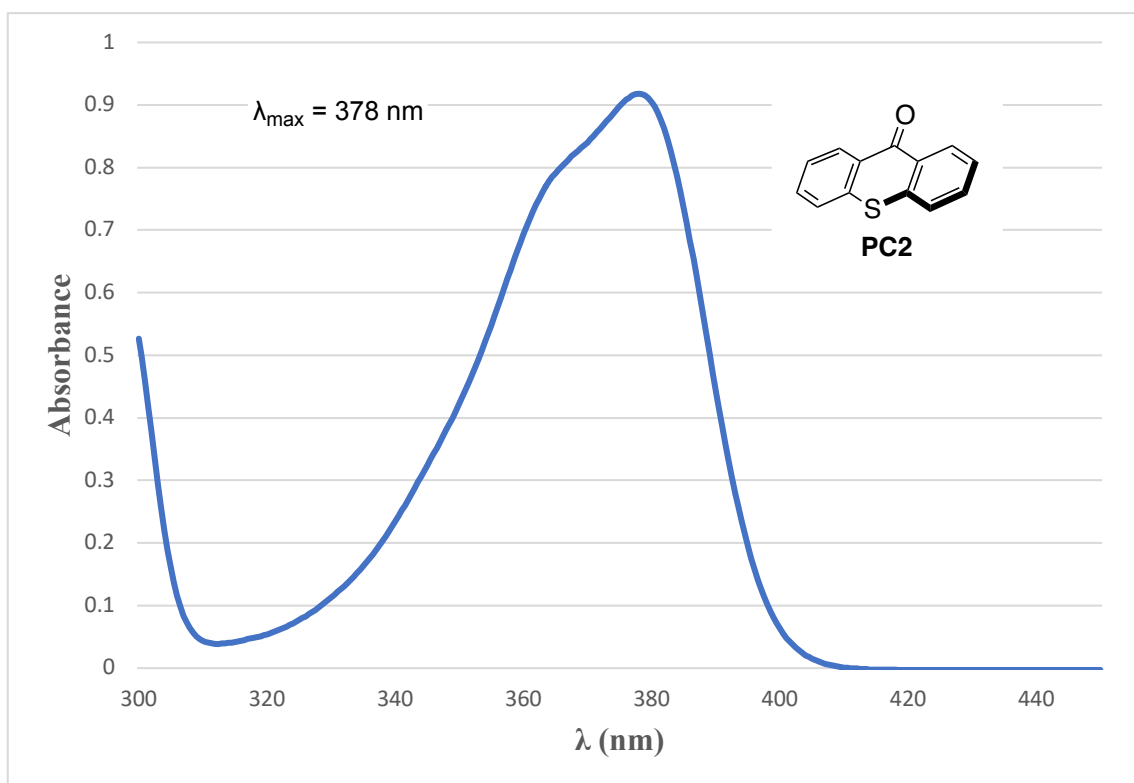

Figure S6. UV-Vis spectrum of PC2.

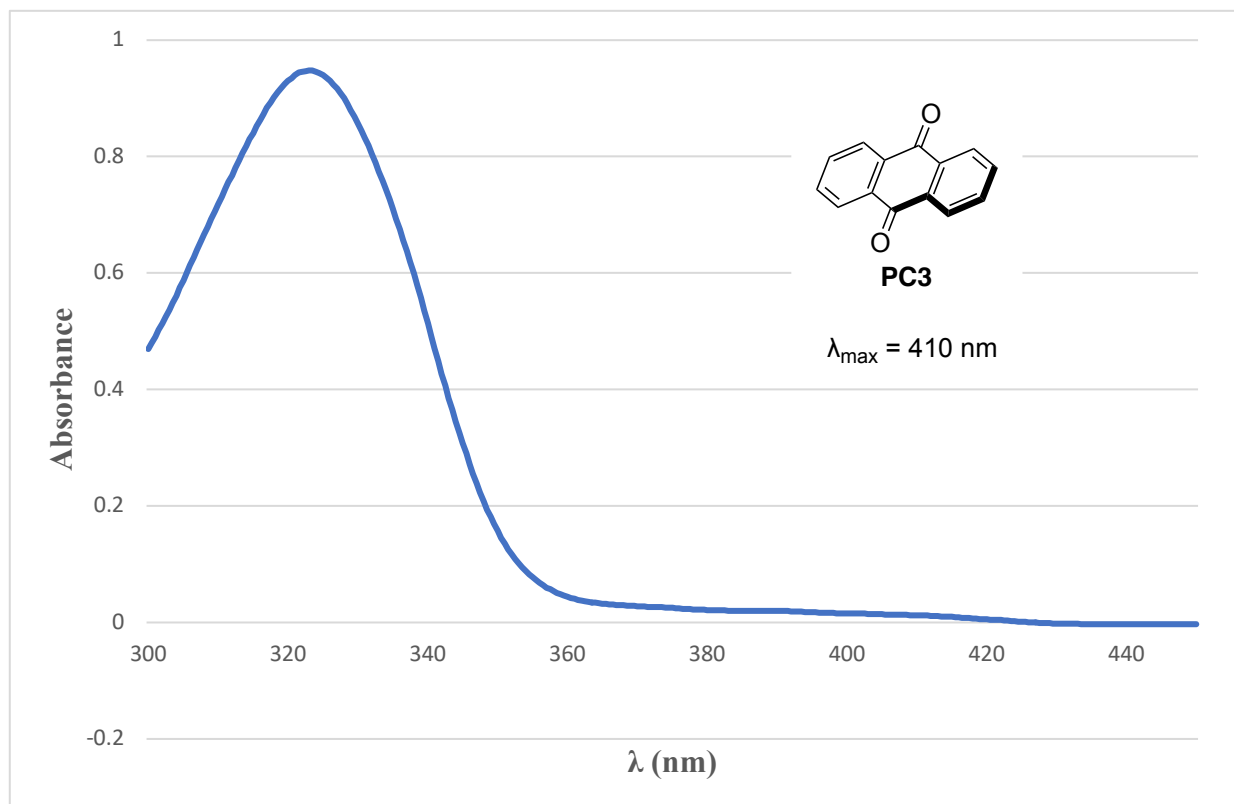

**Figure S7.** UV-Vis spectrum of **PC3**.

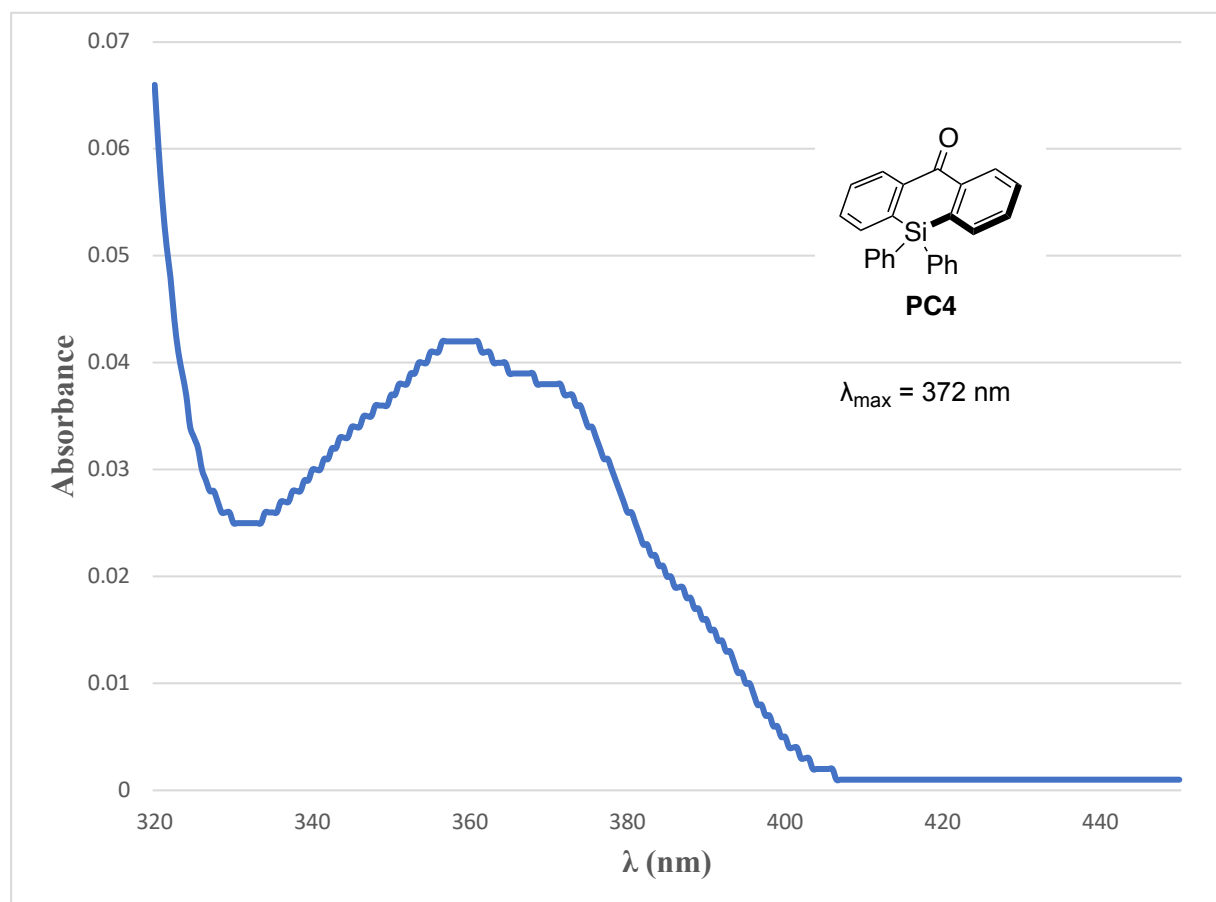

**Figure S8.** UV-Vis spectrum of **PC4**.

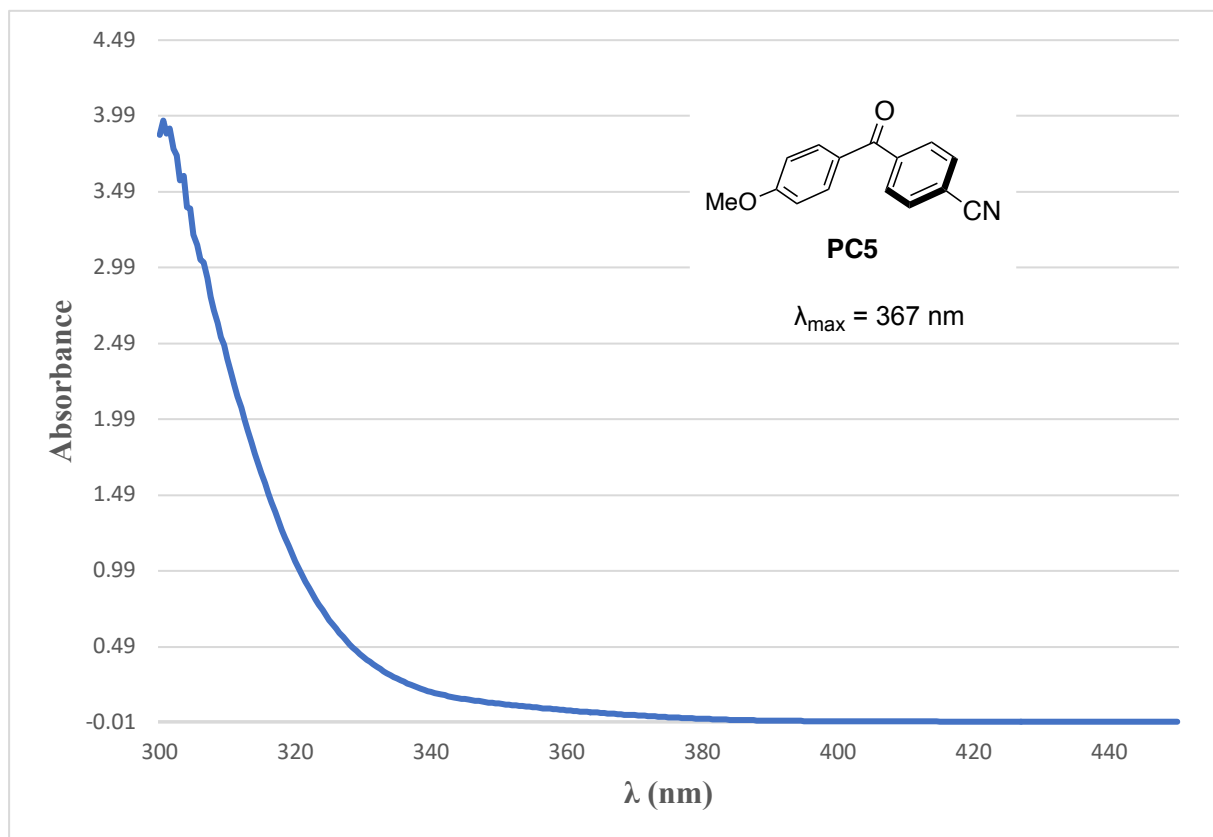

**Figure S9.** UV-Vis spectrum of **PC5**.

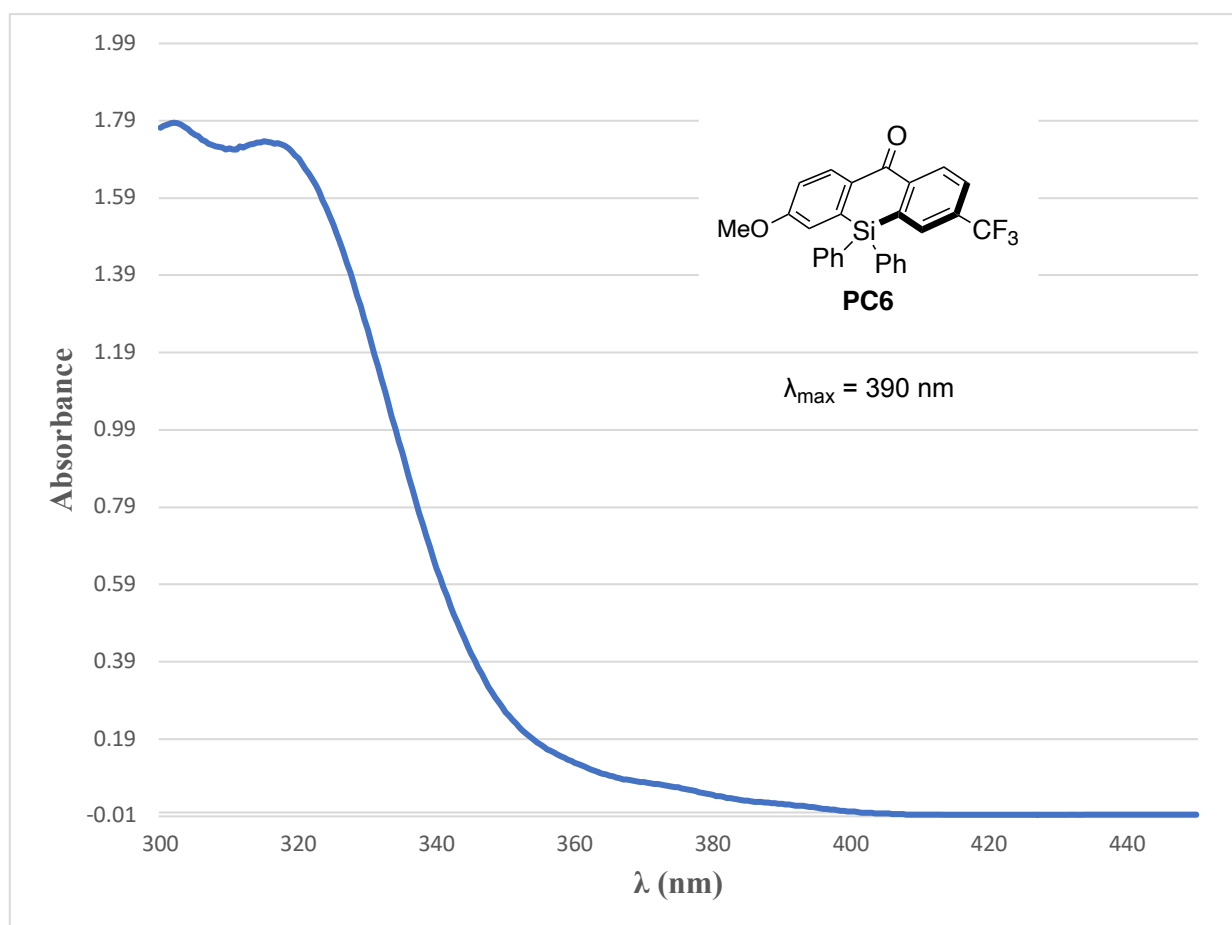

**Figure S10.** UV-Vis spectrum of **PC6**.

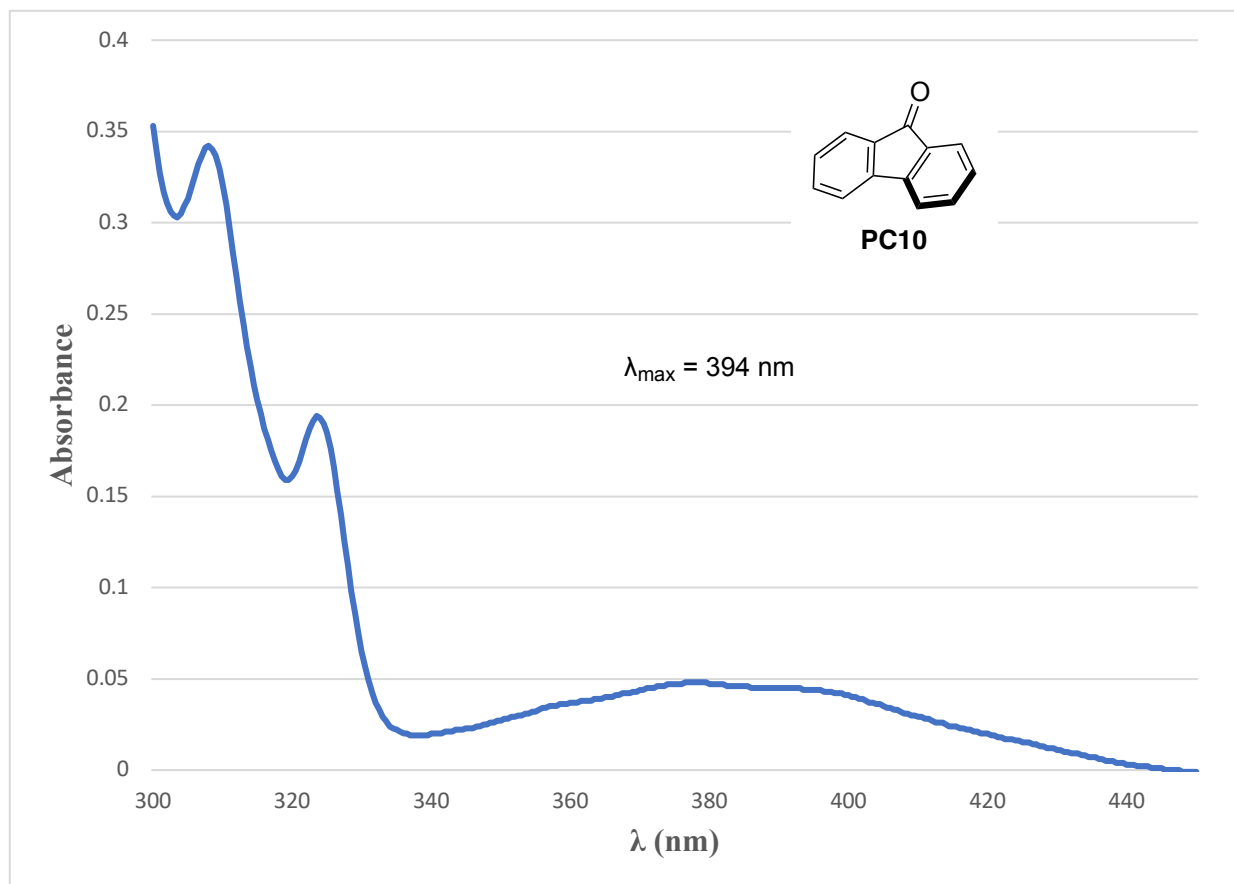

**Figure S11.** UV-Vis spectrum of PC10.

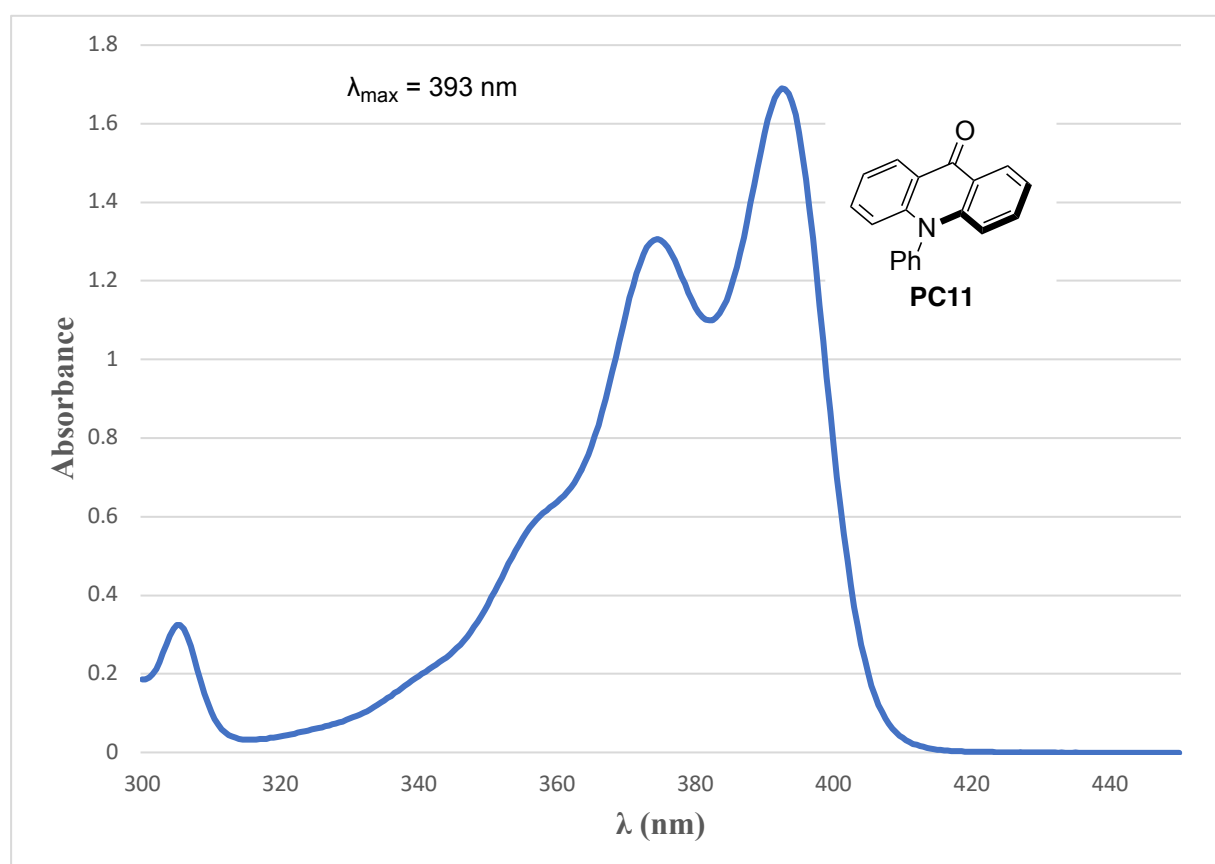

**Figure S12.** UV-Vis spectrum of PC11.

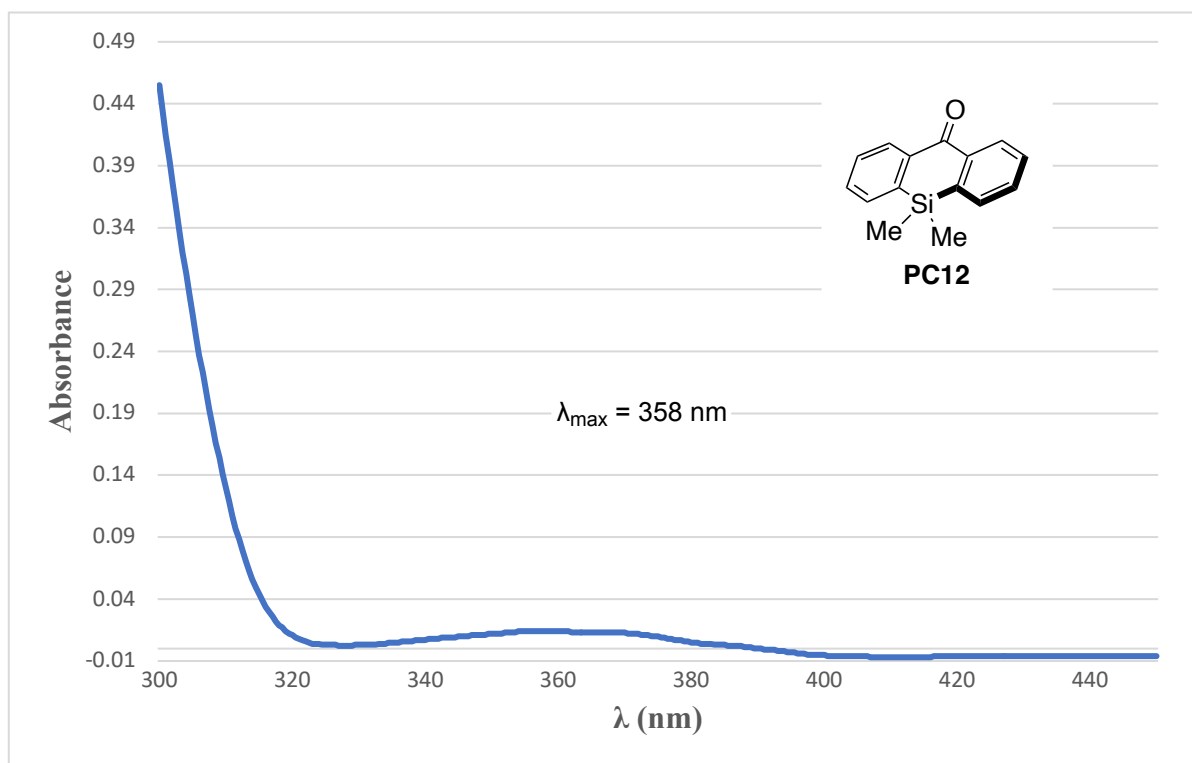

**Figure S13.** UV-Vis spectrum of **PC12**.

## 14. Fluorescence Spectra of Photocatalysts

Fluorescence spectra of organophotocatalysts were measured with 200  $\mu\text{M}$  acetonitrile solution.

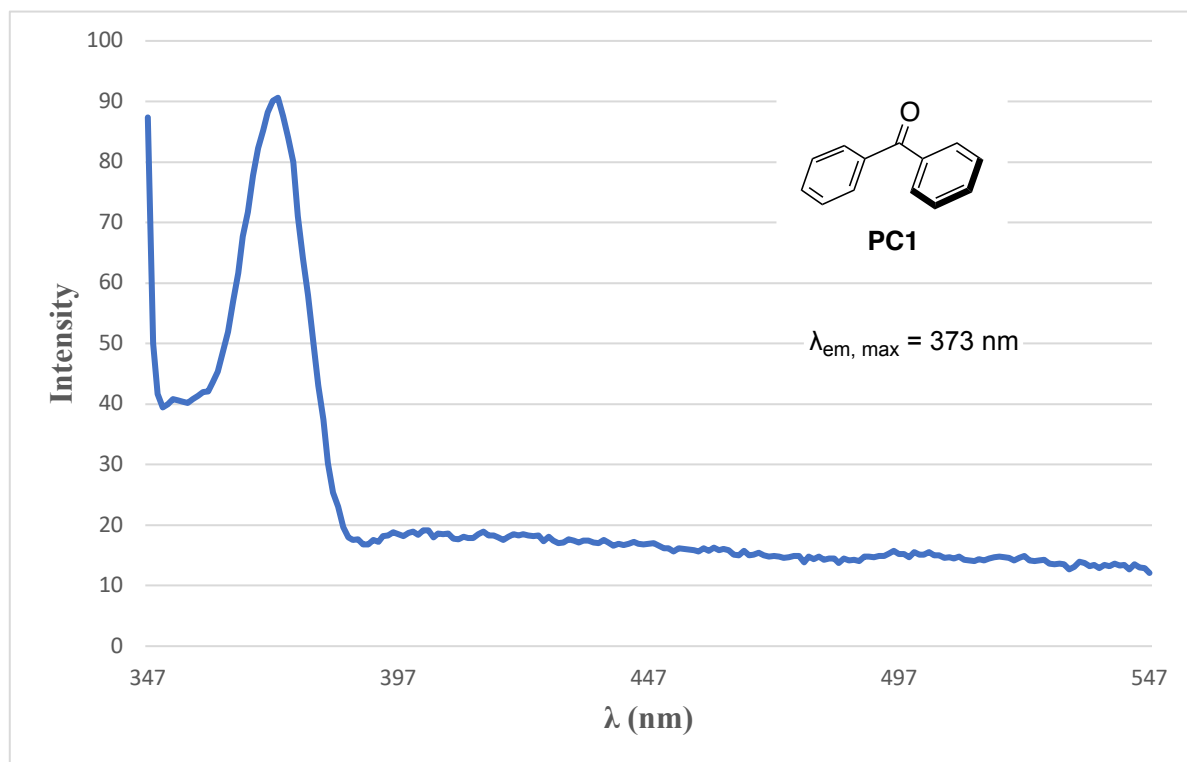

**Figure S14.** Fluorescence spectrum of PC1 was scanned after excitation at 337 nm.

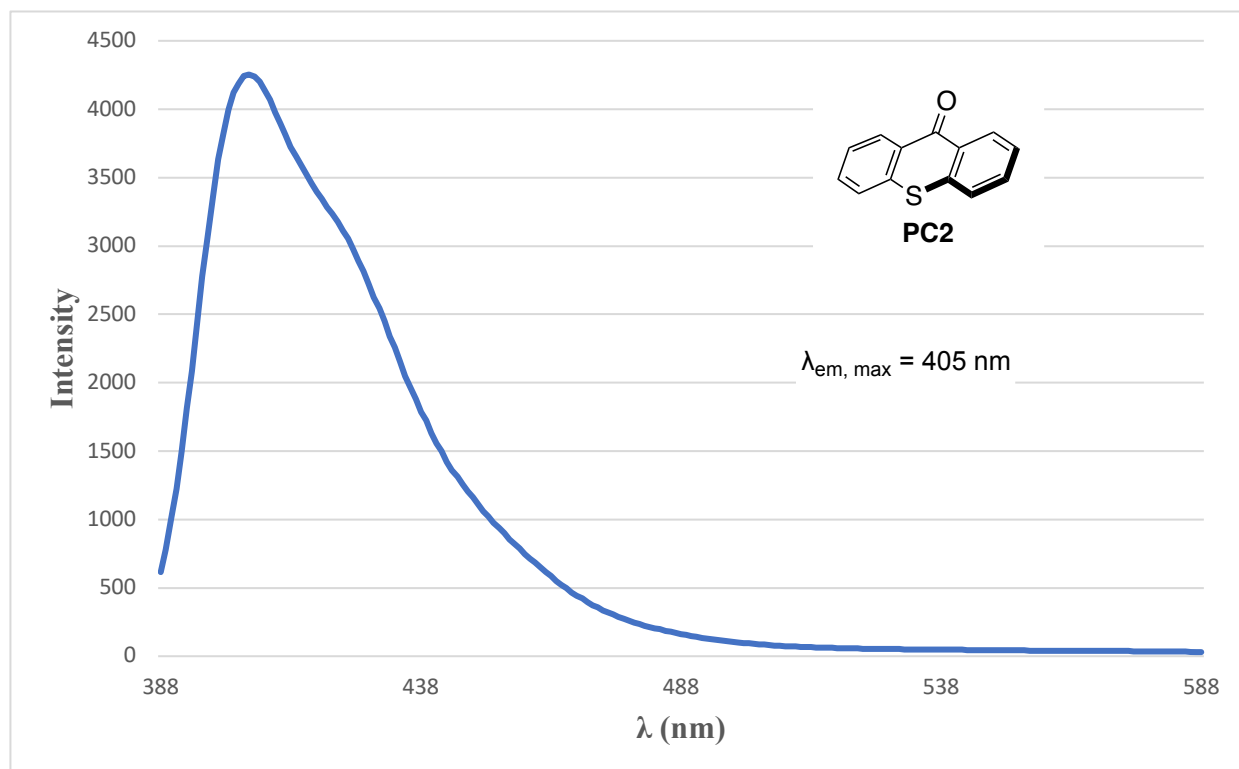

**Figure S15.** Fluorescence spectrum of PC2 was scanned after excitation at 378 nm.

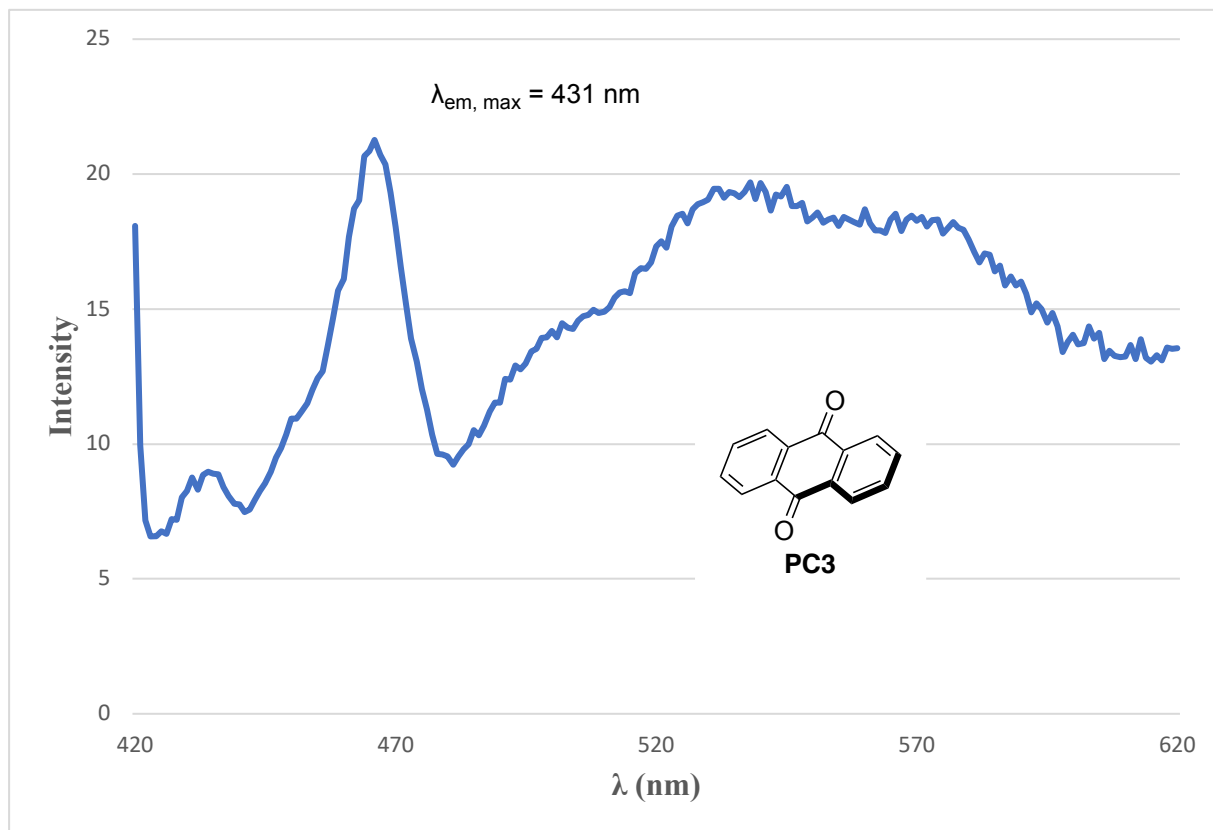

**Figure S16.** Fluorescence spectrum of PC3 was scanned after excitation at 410 nm.

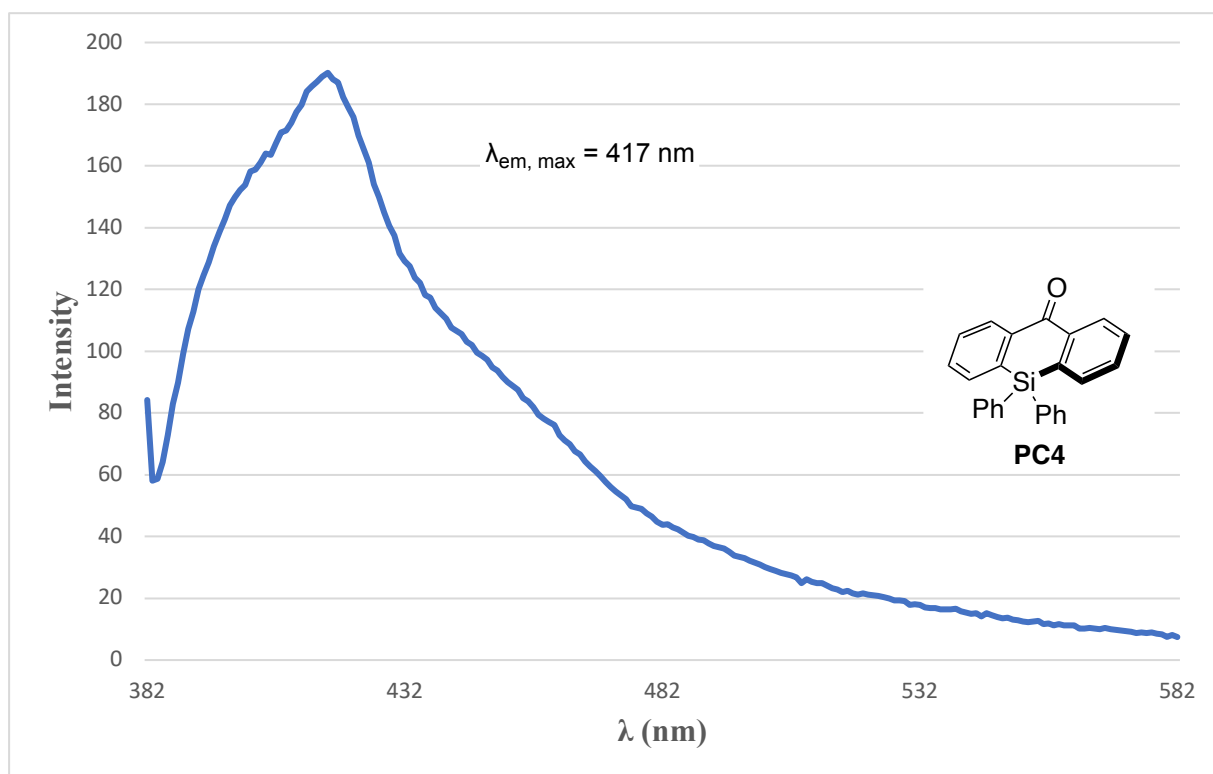

**Figure S17.** Fluorescence spectrum of PC4 was scanned after excitation at 372 nm.



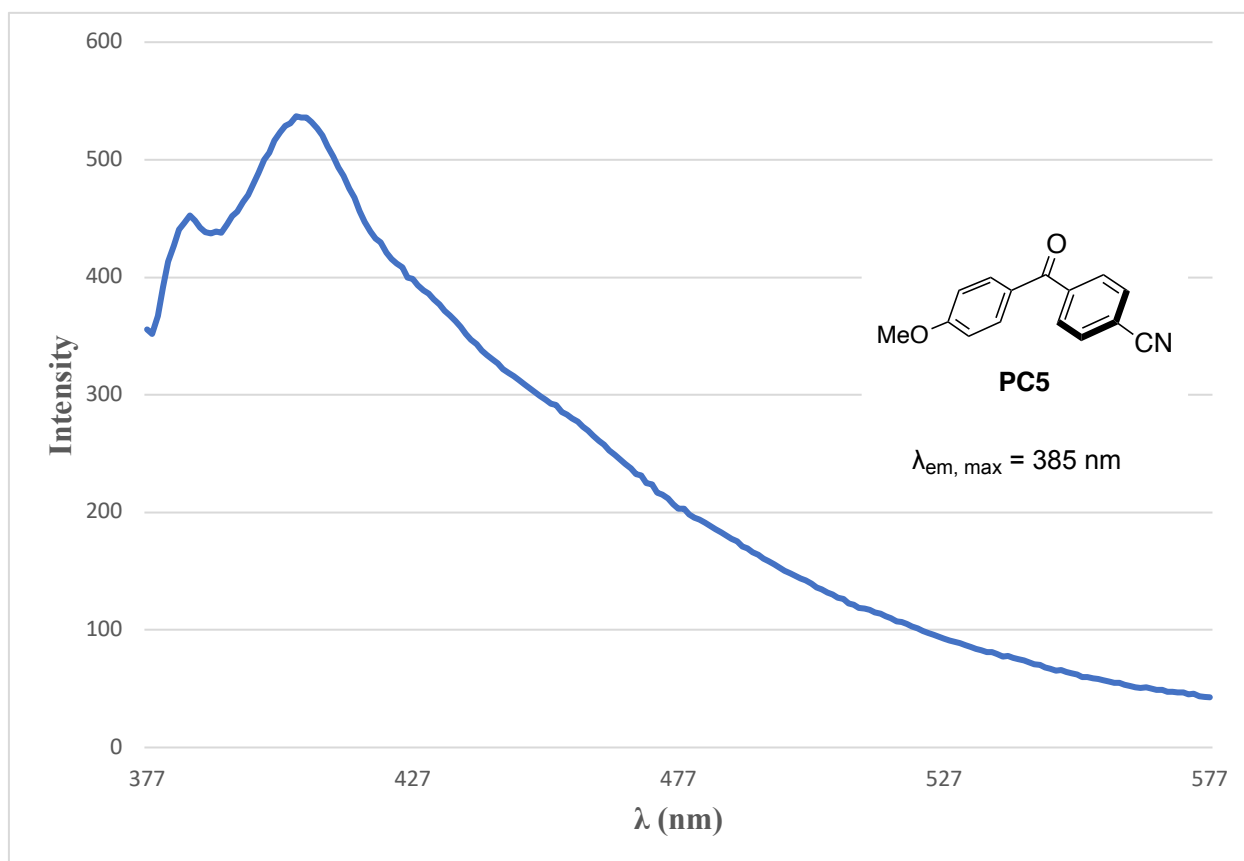

**Figure S18.** Fluorescence spectrum of **PC5** was scanned after excitation at 367 nm.

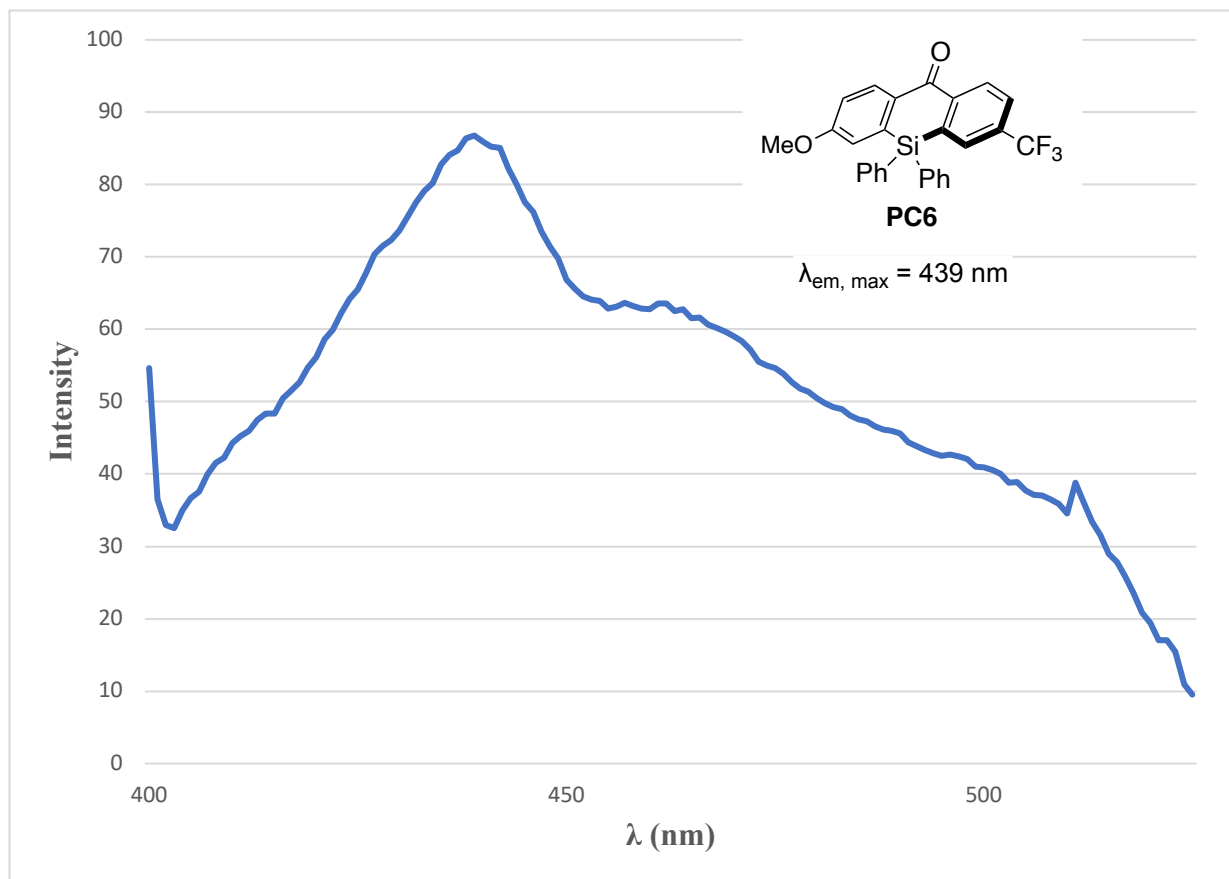

**Figure S19.** Fluorescence spectrum of **PC6** was scanned after excitation at 390 nm.

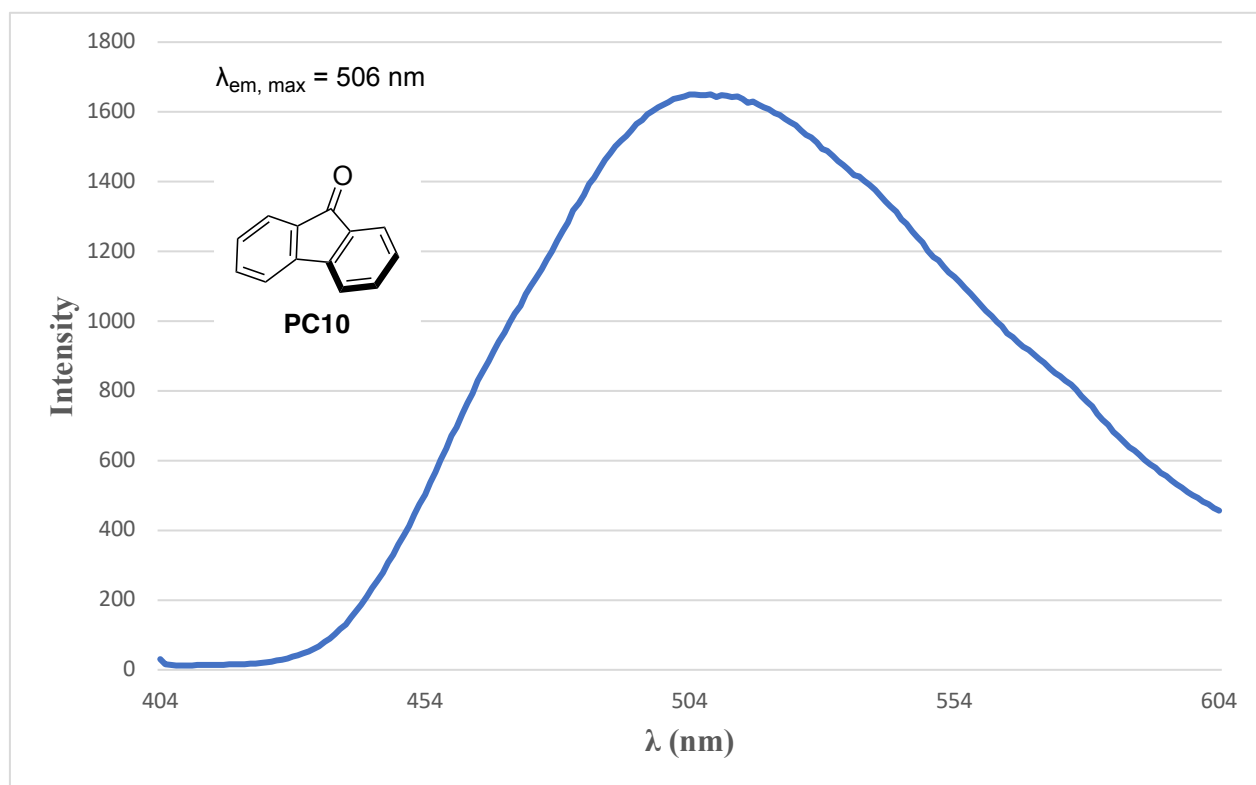

**Figure S20.** Fluorescence spectrum of **PC10** was scanned after excitation at 394 nm.

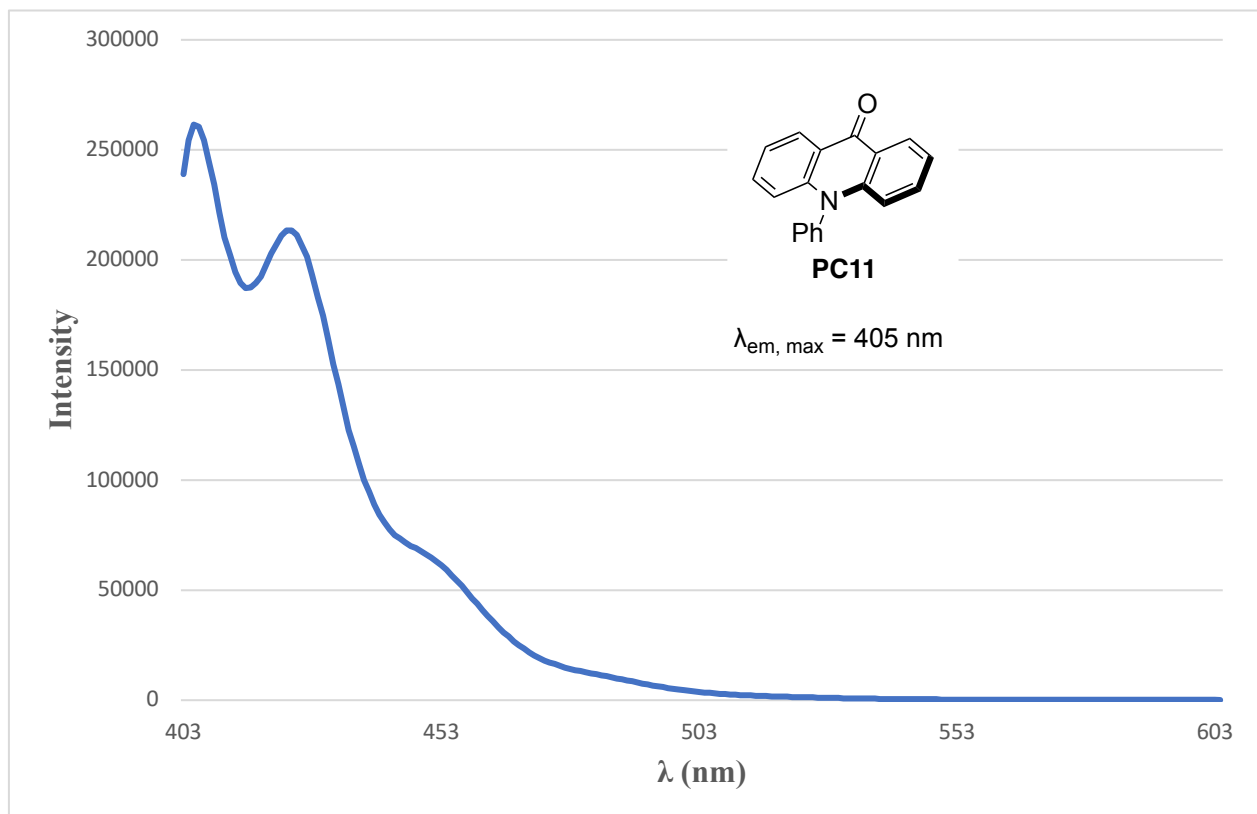

**Figure S21.** Fluorescence spectrum of **PC11** was scanned after excitation at 393 nm.

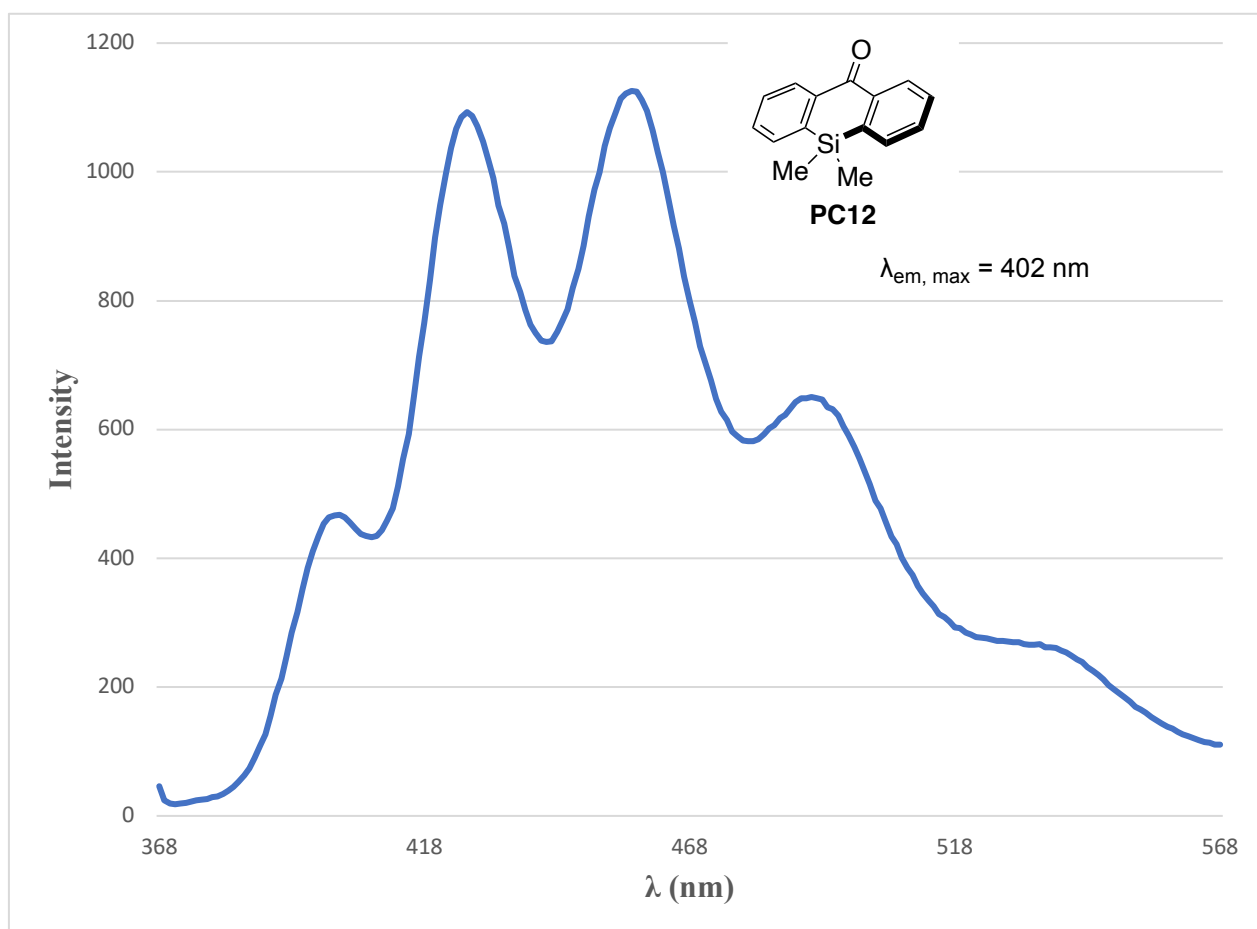

**Figure S22.** Fluorescence spectrum of **PC12** was scanned after excitation at 358 nm.

## 15. Cyclic Voltammetry (CV) of Photocatalysts

CV measurements were carried out under nitrogen atmosphere in acetonitrile solutions with 0.1 M of tetrabutylammonium perchlorate ( $\text{Bu}_4\text{NClO}_4$ ) as a supporting electrolyte. Measurements were made with a glassy carbon electrode (area =  $0.07 \text{ cm}^2$ ), an  $\text{Ag}/\text{AgNO}_3$  reference electrode, and a Pt wire counter electrode. The concentration of the sample solution was fixed at 10 mM and the sweep rates were set to 100 mV/s. The ferrocenium/ferrocene ( $\text{Fc}^+/\text{Fc}$ ) couple was used for calibration.

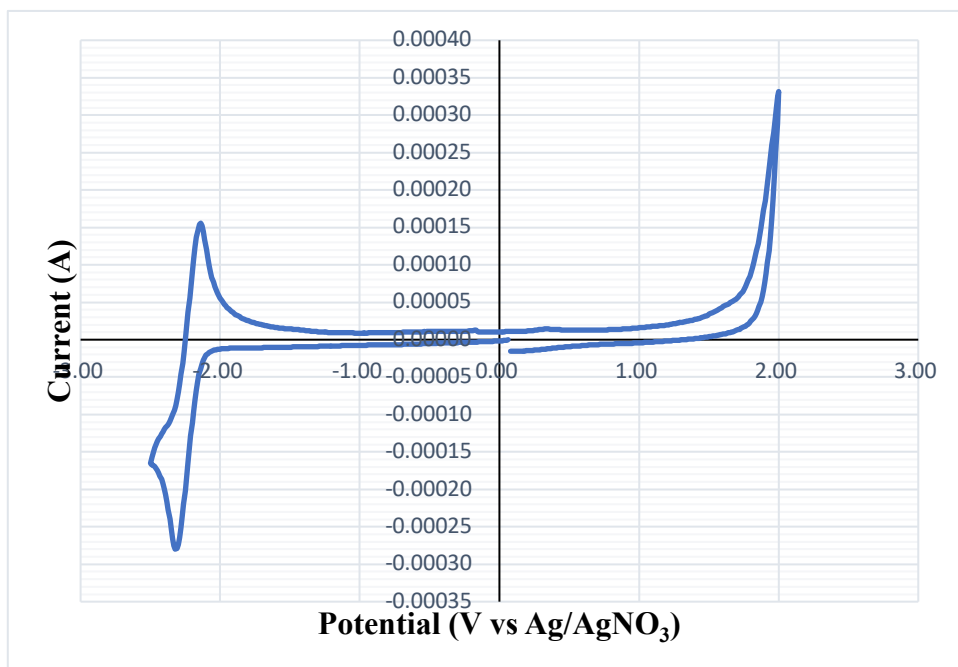

Figure S23. Cyclic voltammogram of PC1.

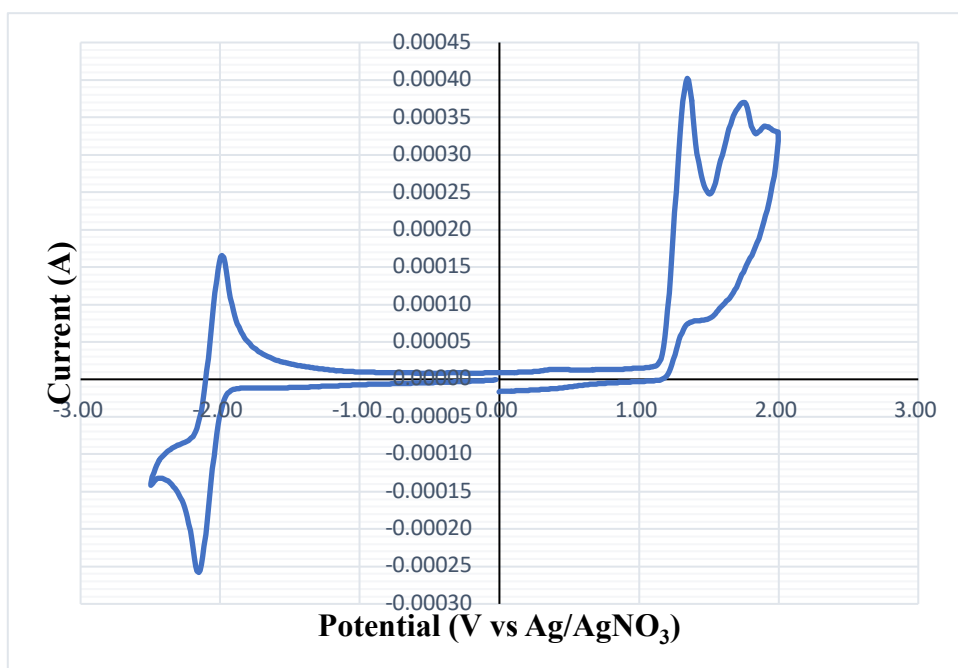

Figure S24. Cyclic voltammogram of PC2.

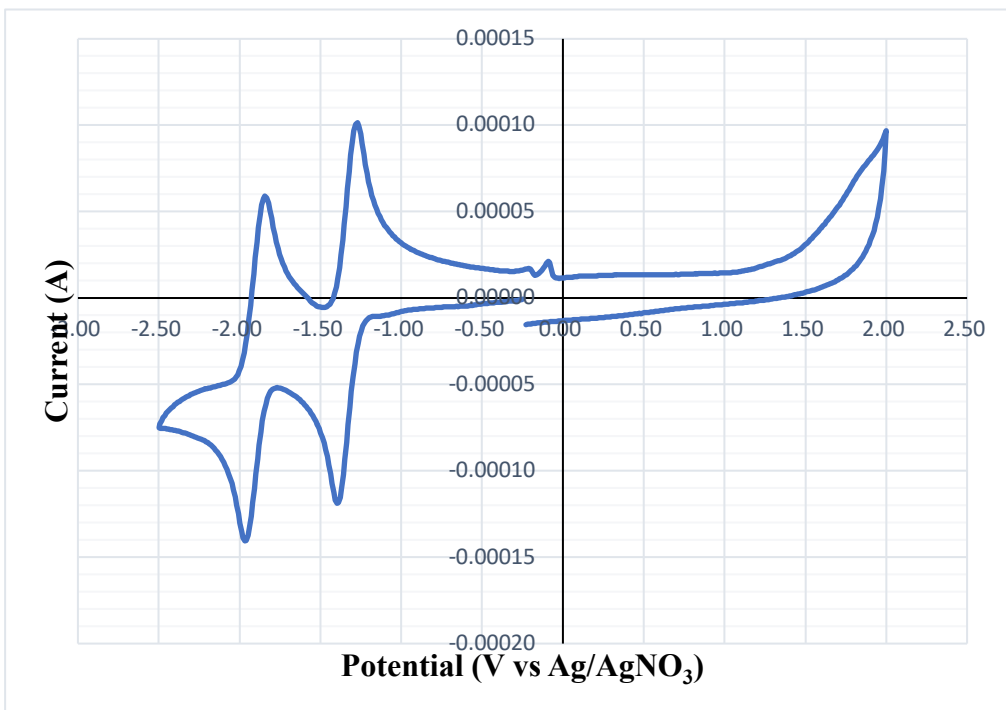

**Figure S25.** Cyclic voltammogram of PC3.

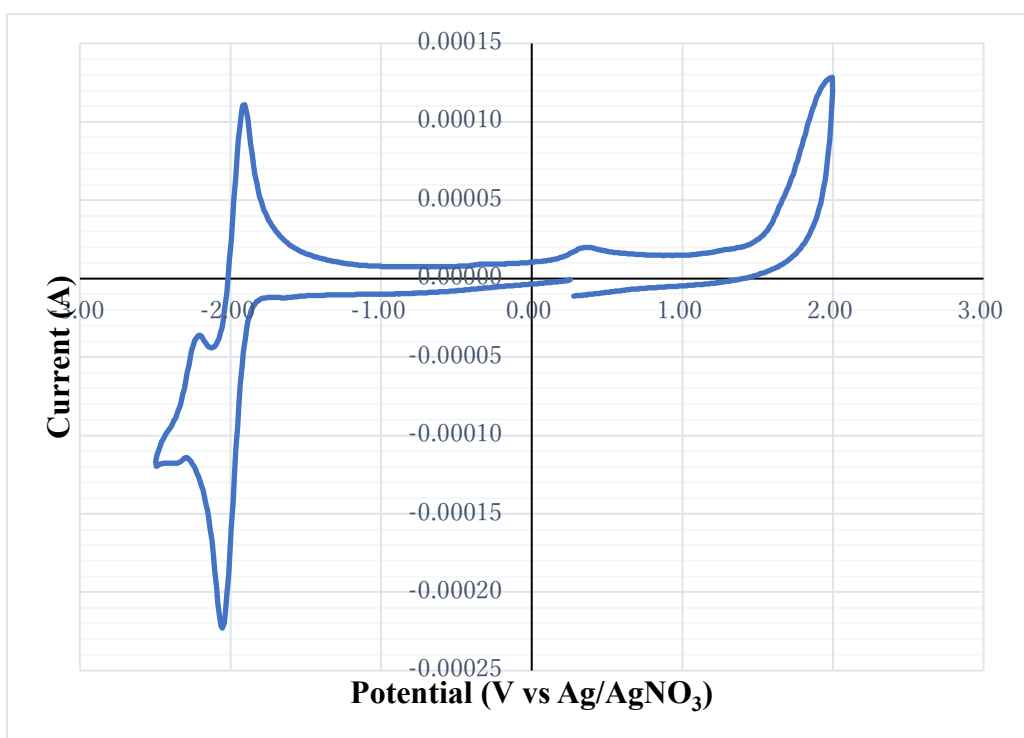

**Figure S26.** Cyclic voltammogram of PC4.

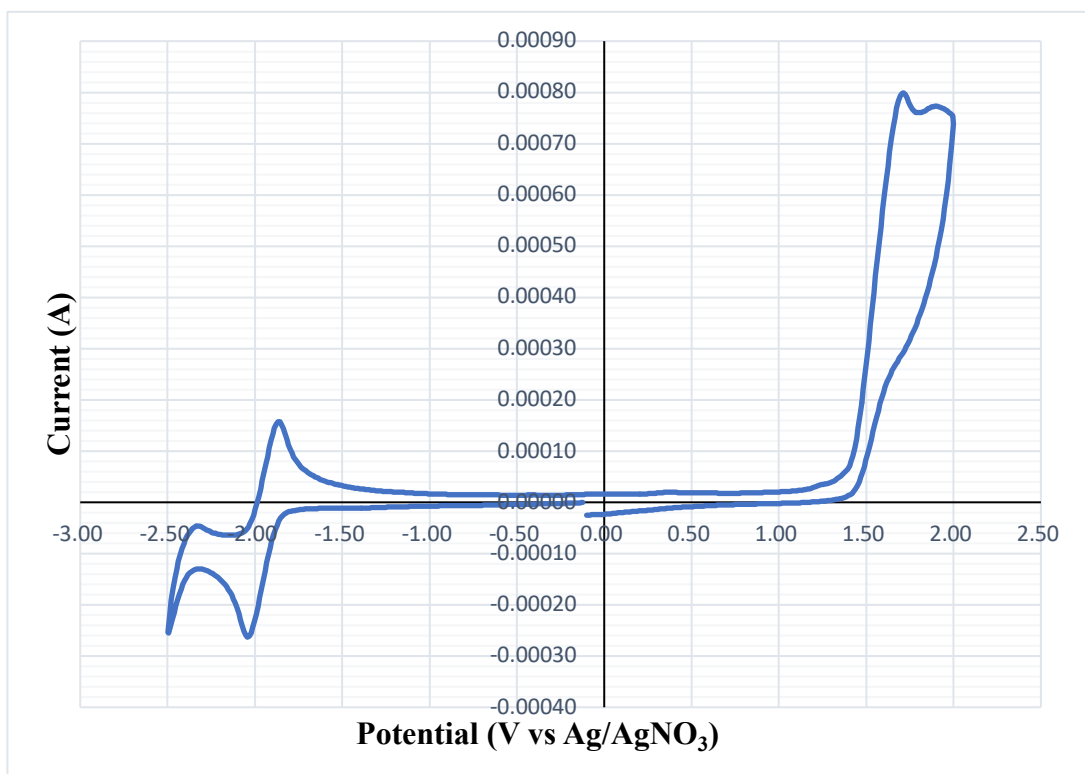

Figure S27. Cyclic voltammogram of PC5.

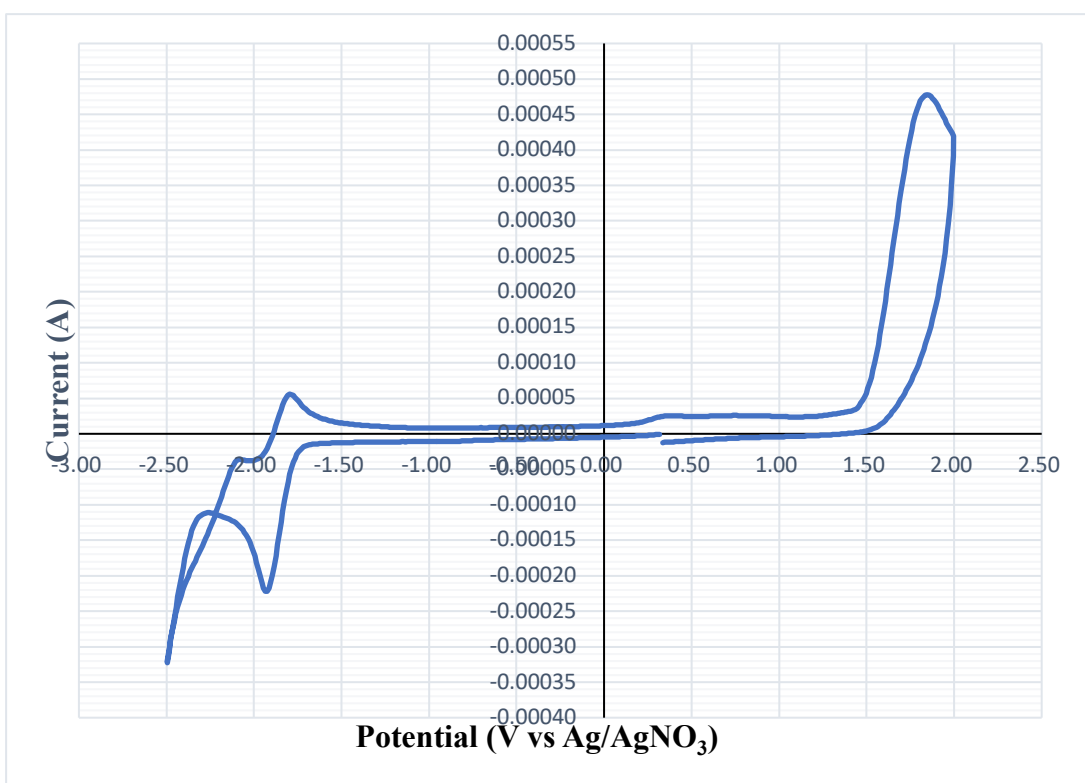

Figure S28. Cyclic voltammogram of PC6.

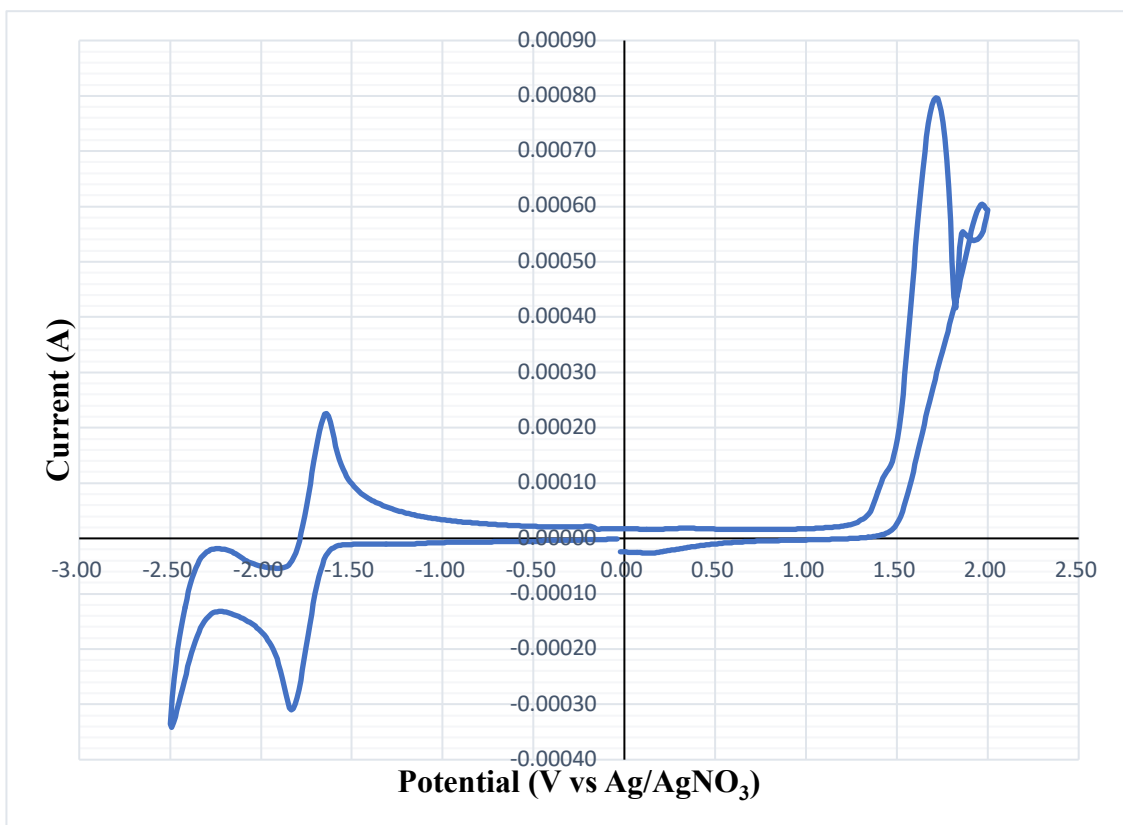

**Figure S29.** Cyclic voltammogram of PC10.

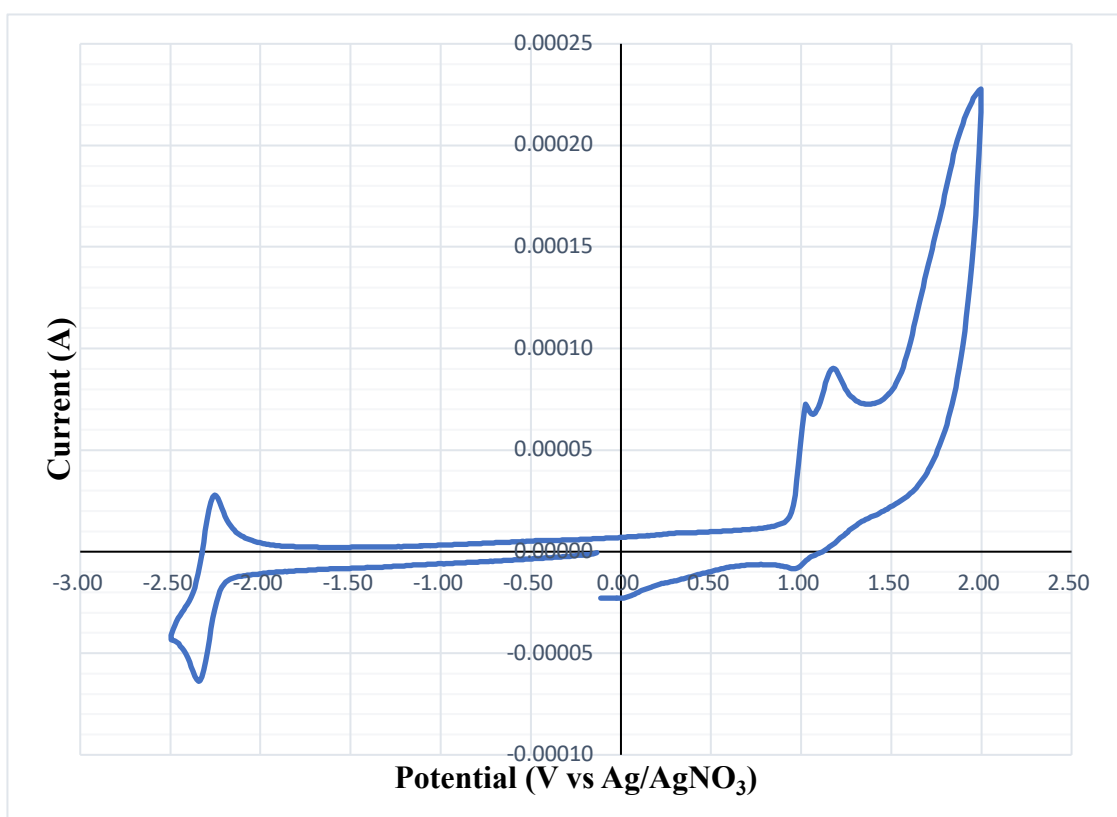

**Figure S30.** Cyclic voltammogram of PC11. The concentration of the sample solution was 2 mM.

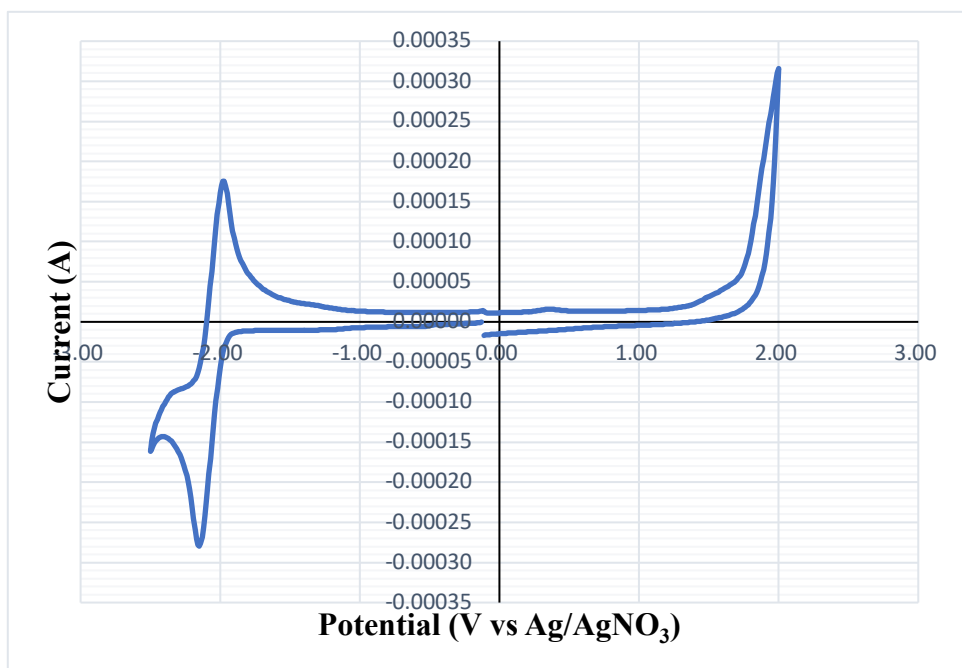

**Figure S31.** Cyclic voltammogram of PC12.

## 16. Summary of Redox Properties of Organophotocatalysts

|      | $E_{1/2}(\text{PC}/\text{PC}^{\bullet-})$<br>(V vs $\text{Fc}^+/\text{Fc}$ ) <sup>a</sup> | $E_{1/2}(\text{PC}/\text{PC}^{\bullet-})$<br>(V vs SCE) <sup>b</sup> | $\lambda_{\text{max, em}}$ (nm) | $E_{\text{S1, exp}}$ (eV) <sup>c</sup> | $E^{\text{S1, exp}}(\text{PC}^{\bullet+}/\text{PC}^{\bullet-})$<br>(V vs SCE) <sup>d</sup> |
|------|-------------------------------------------------------------------------------------------|----------------------------------------------------------------------|---------------------------------|----------------------------------------|--------------------------------------------------------------------------------------------|
| PC1  | -2.22                                                                                     | -1.79                                                                | 337                             | 3.32                                   | 1.53                                                                                       |
| PC2  | -2.06                                                                                     | -1.63                                                                | 378                             | 3.06                                   | 1.43                                                                                       |
| PC3  | -1.33                                                                                     | -0.90                                                                | 410                             | 2.88                                   | 1.98                                                                                       |
| PC4  | -1.97                                                                                     | -1.54                                                                | 372                             | 2.97                                   | 1.43                                                                                       |
| PC5  | -1.90                                                                                     | -1.47                                                                | 367                             | 3.22                                   | 1.75                                                                                       |
| PC6  | -1.85                                                                                     | -1.42                                                                | 390                             | 2.82                                   | 1.40                                                                                       |
| PC10 | -1.73                                                                                     | -1.30                                                                | 394                             | 2.45                                   | 1.15                                                                                       |
| PC11 | -2.29                                                                                     | -1.86                                                                | 393                             | 3.06                                   | 1.20                                                                                       |
| PC12 | -2.05                                                                                     | -1.62                                                                | 358                             | 3.08                                   | 1.46                                                                                       |

<sup>a</sup> Determined by CV experiments. <sup>b</sup>  $E_{1/2}(\text{Fc}^+/\text{Fc})$  (V vs SCE) = 0.43 V. <sup>c</sup> Singlet energies were calculated using the maximum wavelength of emission. <sup>d</sup> Singlet excited state reduction potentials were calculated using the singlet energies and the  $E_{1/2}$ .



## 17. X-ray Diffraction Analysis for PC6

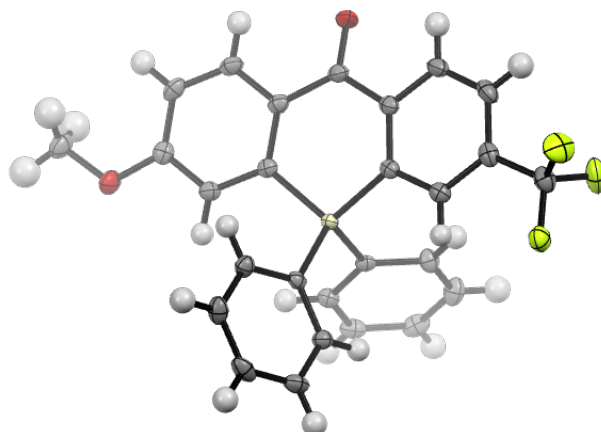

**Figure S32.** ORTEP diagram of **PC6**. Ellipsoids are drawn at 50% probability. A single crystal used for the analysis was obtained by recrystallization from *n*-hexane and tetrahydrofuran.

**Table S9.** Crystal data and structure refinement for **PC6**

|                        |                                                                    |                                                                    |                  |
|------------------------|--------------------------------------------------------------------|--------------------------------------------------------------------|------------------|
| Bond precision:        | C-C = 0.0027 Å Wavelength=0.71073                                  |                                                                    |                  |
| Cell:                  | a=8.589(3)                                                         | b=9.902(4)                                                         | c=14.679(6)      |
|                        | alpha=106.882(5)                                                   | beta=94.204(3)                                                     | gamma=111.756(3) |
| Temperature:           | 86 K                                                               |                                                                    |                  |
|                        | Calculated                                                         | Reported                                                           |                  |
| Volume                 | 1086.3(7)                                                          | 1086.2(7)                                                          |                  |
| Space group            | P -1                                                               | P -1                                                               |                  |
| Hall group             | -P 1                                                               | -P 1                                                               |                  |
| Moiety formula         | C <sub>27</sub> H <sub>19</sub> F <sub>3</sub> O <sub>2</sub> , Si | ?                                                                  |                  |
| Sum formula            | C <sub>27</sub> H <sub>19</sub> F <sub>3</sub> O <sub>2</sub> , Si | C <sub>27</sub> H <sub>19</sub> F <sub>3</sub> O <sub>2</sub> , Si |                  |
| Mr                     | 460.51                                                             | 460.51                                                             |                  |
| Dx,g cm <sup>-3</sup>  | 1.408                                                              | 1.408                                                              |                  |
| Z                      | 2                                                                  | 2                                                                  |                  |
| Mu (mm <sup>-1</sup> ) | 0.157                                                              | 0.157                                                              |                  |
| F000                   | 476.0                                                              | 476.0                                                              |                  |
| F000'                  | 476.43                                                             |                                                                    |                  |
| h,k,lmax               |                                                                    | 10,11,17                                                           |                  |
| Nref                   |                                                                    | 3814                                                               |                  |
| Tmin,Tmax              | 0.956,0.981                                                        | 0.906,0.981                                                        |                  |
| Tmin'                  | 0.904                                                              |                                                                    |                  |
| Correction method=     | # Reported T Limits: Tmin=0.906 Tmax=0.981                         |                                                                    |                  |
| Data completeness=     | Theta(max)= 25.018                                                 |                                                                    |                  |
| R(reflections)=        | 0.0348( 3468)                                                      | wR2(reflections)= 0.0945( 3814)                                    |                  |
| S = 1.036              | Npar= 299                                                          |                                                                    |                  |

## 18. Procedure for Radical Trap Experiment

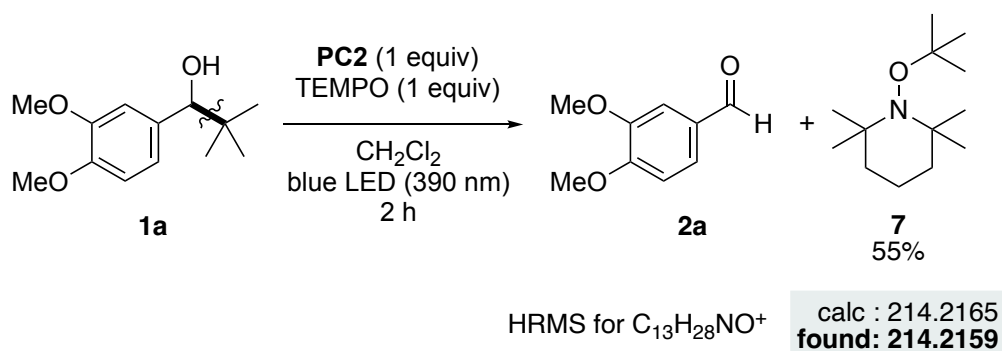

In a glovebox, to a vial equipped with a stirring bar was charged with photoredox catalyst **PC6** (21.2 mg, 0.1 mmol), benzyl alcohol **1a** (22.4 mg, 0.1 mmol), TEMPO (15.6 mg, 0.1 mmol) and  $CH_2Cl_2$  (1.0 mL). After sealing the vial with a cap and removing it from the glovebox, the reaction was stirred and irradiated with a 390 nm blue LED placed 0.5 cm away with a cooling fan to keep the temperature below 50 °C (**Figure S4**). After 2 h, the solvent was removed under reduced pressure, the residue was dissolved in  $CDCl_3$  (500  $\mu$ L) and added 1,1,2,2-tetrachloroethane (18.2 mg, 10.8  $\mu$ mol) as an internal standard.  $^1H$  NMR (400 MHz) yield of **2a** (96%) and yield of **7** (55%) was obtained by comparing the relative value of integration for the singlet peak observed at 9.86 ppm of **2a** and the singlet peak observed at 1.27 ppm of **7** with that of 1,1,2,2-tetrachloroethane observed at 5.96 ppm.

## 19. Stern–Volmer Experiment

In a typical experiment, the fluorescence intensity was measured using a screw-top quartz cuvette (10 mm light path). The sample was prepared by 120  $\mu$ L of 5 mM solution of **PC2** in degassed MeCN with degassed MeCN solution of **1a** or TRIP thiol in each concentration (0, 600, 1400, or 1800  $\mu$ M, respectively) and added until the final volume (3.0 mL). The fluorescence intensity was measured excited absorption maximum ( $I_{max}$ , **PC2** = 378 nm) and the intensity value was determined by the corresponding value of emission maximum ( $E_{max}$ , **PC2** = 405 nm).

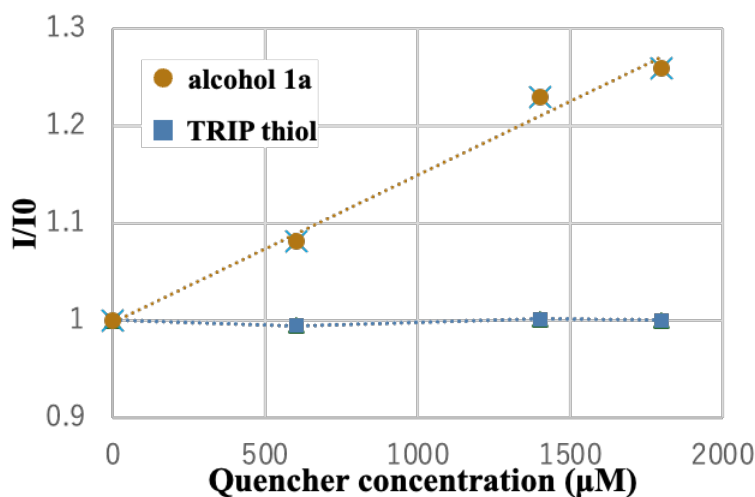

## 20. EDA Complex

MeCN solution of **PC6** (10 mM) and alcohol **1a** (0.1 M) (red line), MeCN solution of **PC6** (10 mM), and MeCN solution of alcohol **1a** (0.1 M) (red line) in a screw-top 1.0 cm quartz cuvette in glovebox were prepared and the UV-Vis absorption spectra were measured.

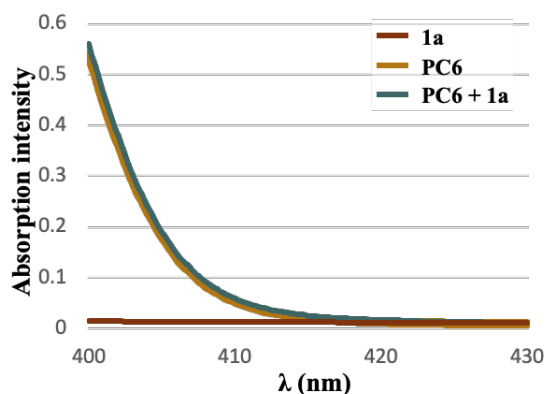

### · NMR experiment

The equimolar of substrate **1a** and **PC6** (0.02 M in  $\text{CDCl}_3$ ) were mixed and  $^1\text{H}$  NMR measurements were performed. Comparison with the  $^1\text{H}$  NMR spectra of **1a** and **PC6**, respectively, showed no change in shift values.

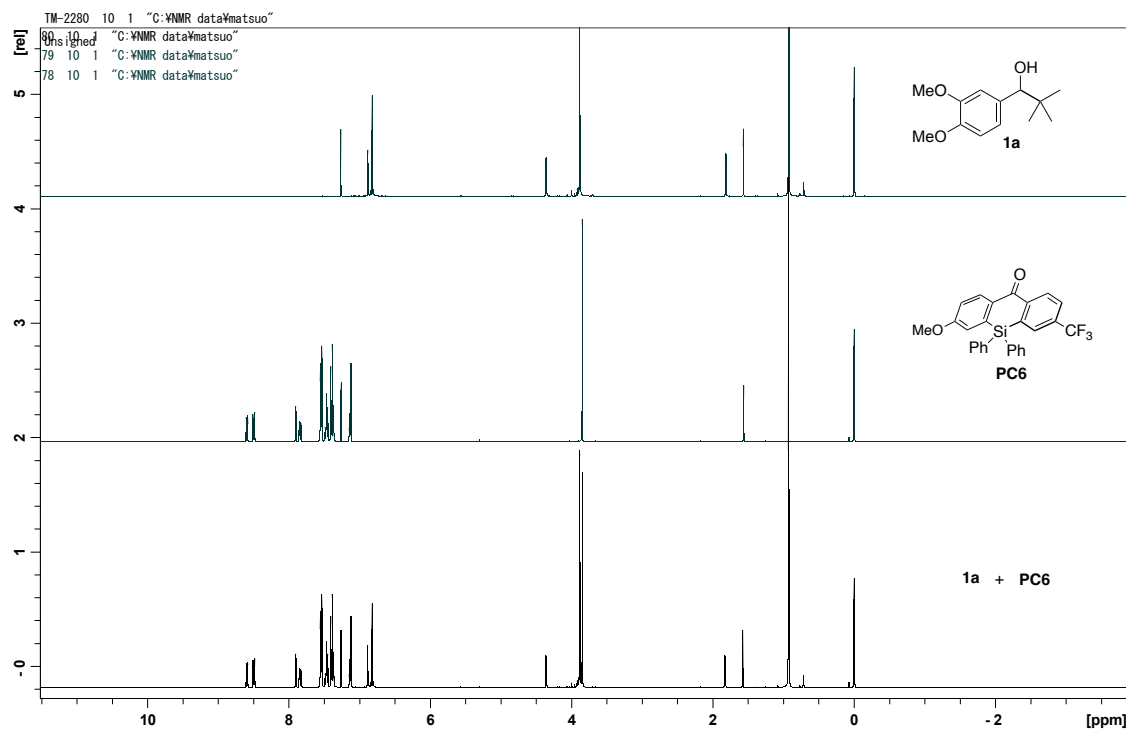

## 21. Computational Studies

Computational Method. The calculations were performed with Gaussian 16 packages (revision C.01).<sup>22</sup> The DFT method was employed using the (U)M06-2X level<sup>23</sup> with the 6-311+G(d,p) for triplet state of PC6 and TS calculations. The IRC calculations were performed for each transition state to confirm the transition state connecting the reaction pathway between the starting materials and the products.

### HOMO/LUMO of PC6

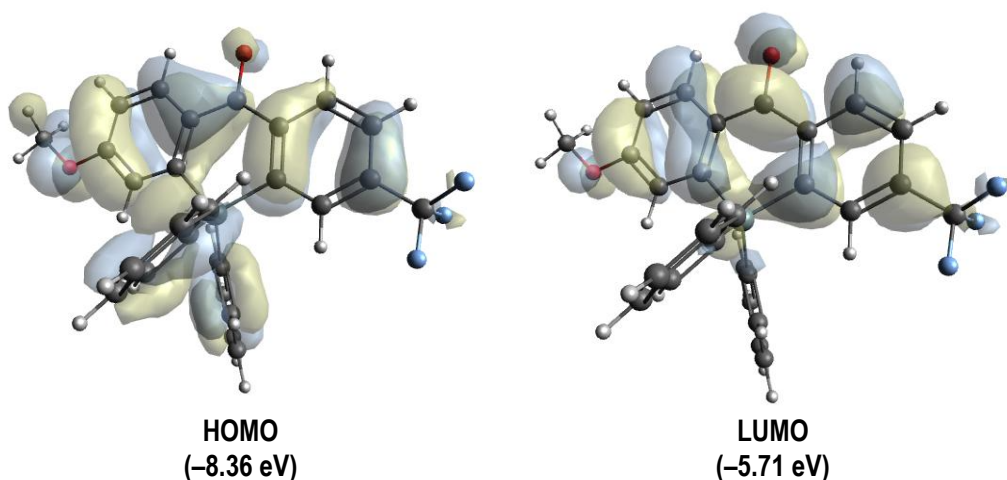

**Figure S33.** Kohn–Sham orbitals of PC6 in the triplet states, calculated at the UM062X/6-311++G(dp) level. Orbital energies are shown in parentheses.

### Cartesian coordinates of PC6

| Center Number | Atomic Number | Atomic Type | Coordinates (Angstroms) |           |           |
|---------------|---------------|-------------|-------------------------|-----------|-----------|
|               |               |             | X                       | Y         | Z         |
| 1             | 6             | 0           | -0.895252               | -2.124924 | -0.048277 |
| 2             | 6             | 0           | -1.079879               | -0.718476 | -0.093477 |
| 3             | 6             | 0           | -2.377150               | -0.219028 | -0.195349 |
| 4             | 6             | 0           | -3.478727               | -1.065429 | -0.231903 |
| 5             | 6             | 0           | -3.298927               | -2.450785 | -0.169575 |
| 6             | 6             | 0           | -2.029486               | -2.976145 | -0.079944 |
| 7             | 6             | 0           | 0.411127                | -2.719106 | 0.017935  |
| 8             | 6             | 0           | 1.706749                | -2.081240 | -0.075613 |
| 9             | 6             | 0           | 1.851993                | -0.670626 | -0.123110 |
| 10            | 6             | 0           | 2.858975                | -2.886233 | -0.140823 |
| 11            | 6             | 0           | 4.122222                | -2.330162 | -0.260661 |
| 12            | 6             | 0           | 4.262379                | -0.941675 | -0.322602 |

|    |    |   |           |           |           |
|----|----|---|-----------|-----------|-----------|
| 13 | 6  | 0 | 3.123830  | -0.132961 | -0.252739 |
| 14 | 8  | 0 | 0.437061  | -4.043597 | 0.115197  |
| 15 | 1  | 0 | -2.536031 | 0.854598  | -0.237269 |
| 16 | 1  | 0 | -4.160242 | -3.108340 | -0.190930 |
| 17 | 1  | 0 | -1.897369 | -4.051131 | -0.039833 |
| 18 | 1  | 0 | 2.764773  | -3.965896 | -0.107298 |
| 19 | 1  | 0 | 4.982633  | -2.983671 | -0.310115 |
| 20 | 1  | 0 | 3.271118  | 0.941995  | -0.303432 |
| 21 | 6  | 0 | 0.327729  | 1.250397  | 1.770152  |
| 22 | 6  | 0 | 1.125321  | 2.368586  | 2.050276  |
| 23 | 6  | 0 | -0.452514 | 0.717054  | 2.802319  |
| 24 | 6  | 0 | 1.145130  | 2.933393  | 3.320402  |
| 25 | 6  | 0 | -0.437098 | 1.280979  | 4.075127  |
| 26 | 6  | 0 | 0.362067  | 2.388785  | 4.334776  |
| 27 | 1  | 0 | 1.766554  | 3.798819  | 3.519279  |
| 28 | 1  | 0 | -1.050494 | 0.857476  | 4.861874  |
| 29 | 1  | 0 | -1.083811 | -0.145364 | 2.610386  |
| 30 | 1  | 0 | 1.731498  | 2.811468  | 1.264716  |
| 31 | 14 | 0 | 0.367313  | 0.452562  | 0.070686  |
| 32 | 6  | 0 | 0.941738  | 1.558525  | -2.498489 |
| 33 | 6  | 0 | 0.888423  | 2.524131  | -3.497814 |
| 34 | 6  | 0 | 0.257250  | 3.740709  | -3.255968 |
| 35 | 6  | 0 | -0.317306 | 3.990020  | -2.013942 |
| 36 | 6  | 0 | -0.257763 | 3.023492  | -1.014476 |
| 37 | 6  | 0 | 0.369966  | 1.791632  | -1.240911 |
| 38 | 1  | 0 | 1.437581  | 0.613165  | -2.697800 |
| 39 | 1  | 0 | 1.338357  | 2.328798  | -4.464235 |
| 40 | 1  | 0 | 0.214280  | 4.493644  | -4.034395 |
| 41 | 1  | 0 | -0.808199 | 4.937105  | -1.822629 |
| 42 | 1  | 0 | -0.699063 | 3.234733  | -0.044784 |
| 43 | 1  | 0 | 0.373596  | 2.829776  | 5.324780  |
| 44 | 8  | 0 | 5.445526  | -0.295325 | -0.446868 |
| 45 | 6  | 0 | 6.622836  | -1.075533 | -0.505227 |
| 46 | 1  | 0 | 7.446082  | -0.371217 | -0.596497 |
| 47 | 1  | 0 | 6.748658  | -1.667225 | 0.406541  |
| 48 | 1  | 0 | 6.613170  | -1.739352 | -1.375070 |
| 49 | 6  | 0 | -4.863475 | -0.518656 | -0.384281 |
| 50 | 9  | 0 | -5.746011 | -1.170364 | 0.392538  |
| 51 | 9  | 0 | -5.315778 | -0.636691 | -1.646888 |
| 52 | 9  | 0 | -4.937890 | 0.781029  | -0.067246 |

·  $\beta$ -scission of alcohol via PCET

The feasibility of the plausible reaction pathway using computational methods to gain mechanistic insights and energy profiles (Fig. 3d). The triplet state (**T1**) of the silicon-bridged benzophenone had higher energy and formed a stabilized complex with substrate **1a** (0 kcal/mol). The formation of alkoxy and ketyl radicals (**INT1**) via **TS1** likely involves either concerted electron/proton transfer (CEPT) or stepwise electron and proton transfer (ET/PT), though DFT calculations couldn't distinguish between them. **TS2** represents the transition state for forming the *t*Bu radical via C–C bond cleavage of the alkoxy radical. Despite the relatively high **TS2** energy (17.9 kcal/mol), it was reasonable.

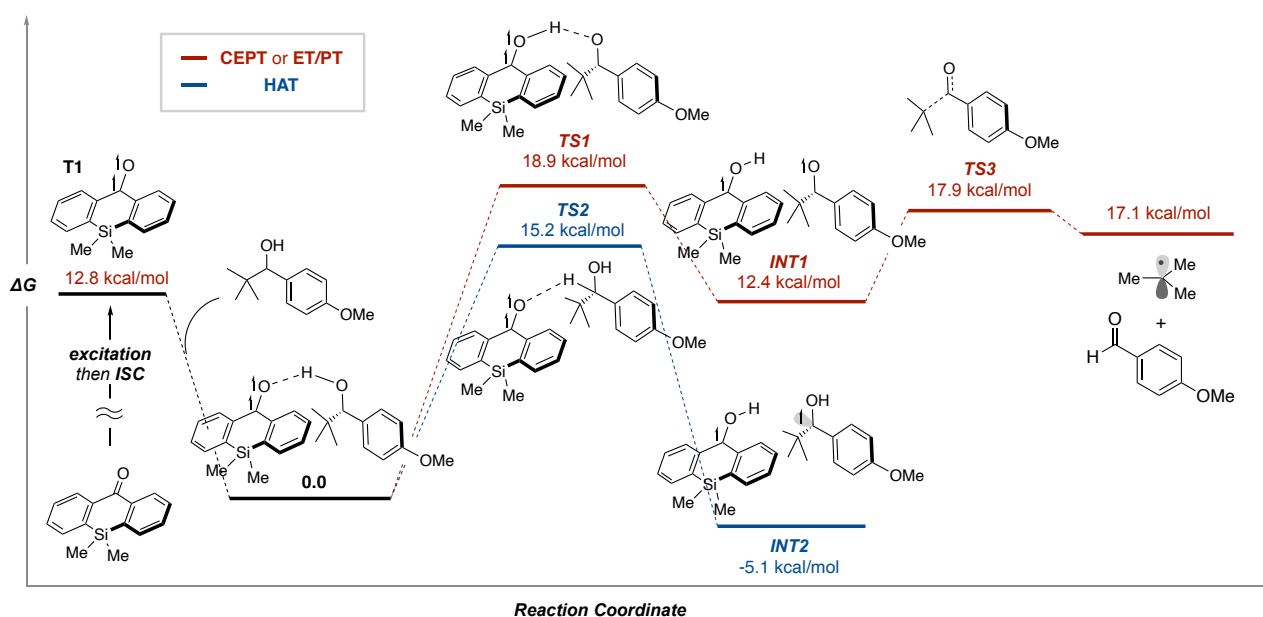

**Figure S34.** Reaction coordinate for unimolecular PCET and HAT pathway

| (U)M06-2X/6-311+G(d,p) (hartree) |            |                    |               |                                         |
|----------------------------------|------------|--------------------|---------------|-----------------------------------------|
|                                  | EE         | Thermal Enthalpies | Free Energies | Thermal correction to Gibbs Free Energy |
| ground state of <b>PC6</b>       | -944.67102 | -944.40806         | -944.40901    | -0.26201                                |
| triplet state of <b>PC6</b>      | -944.564   | -944.30402         | -944.30496    | -0.25904                                |
| benzyl alcohol                   | -618.45887 | -618.1628          | -618.16374    | -0.29513                                |
| <b>INT0</b>                      | -1563.0433 | -1562.4855         | -1562.4865    | -0.5568                                 |
| <b>TS1</b>                       | -1563.0132 | -1562.4631         | -1562.4641    | -0.54910                                |

|                     |             |             |             |          |
|---------------------|-------------|-------------|-------------|----------|
| <b>TS2</b>          | -1563.0191  | -1562.4657  | -1562.4666  | -0.55250 |
| SiBP radical        | -945.24041  | -944.96671  | -944.96765  | -0.27276 |
| Alkoxy radical      | -617.78313  | -617.50132  | -617.50226  | -0.28087 |
| <b>INT1</b>         | -1563.02354 | -1562.46803 | -1562.46991 | -0.55363 |
| Benzyl radical      | -617.80362  | -617.52054  | -617.52148  | -0.28214 |
| <b>INT2</b>         | -1563.04403 | -1562.48725 | -1562.48913 | -0.55490 |
| <b>TS3</b>          | -1563.0149  | -1562.4596  | -1562.4605  | -0.55440 |
| <i>t</i> Bu radical | -157.74471  | -157.62014  | -157.62109  | -0.12362 |
| anisaldehyde        | -460.03085  | -459.87752  | -459.87847  | -0.15238 |

### Cartesian coordinates of ground state of PC6

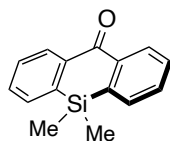


---

| Center<br>Number | Atomic<br>Number | Atomic<br>Type | Coordinates (Angstroms) |           |           |
|------------------|------------------|----------------|-------------------------|-----------|-----------|
|                  |                  |                | X                       | Y         | Z         |
| 1                | 6                | 0              | 1.327279                | -1.000933 | 0.000077  |
| 2                | 6                | 0              | 1.474457                | 0.395589  | -0.000021 |
| 3                | 6                | 0              | 2.769191                | 0.930038  | -0.000159 |
| 4                | 6                | 0              | 3.890965                | 0.112263  | -0.000235 |
| 5                | 6                | 0              | 3.733618                | -1.271922 | -0.000160 |
| 6                | 6                | 0              | 2.462089                | -1.821779 | -0.000006 |
| 7                | 6                | 0              | 0.000000                | -1.723380 | 0.000309  |
| 8                | 6                | 0              | -1.327278               | -1.000933 | 0.000079  |
| 9                | 6                | 0              | -1.474456               | 0.395588  | -0.000015 |
| 10               | 6                | 0              | -2.462088               | -1.821779 | -0.000005 |
| 11               | 6                | 0              | -3.733618               | -1.271923 | -0.000156 |
| 12               | 6                | 0              | -3.890964               | 0.112262  | -0.000226 |
| 13               | 6                | 0              | -2.769191               | 0.930038  | -0.000150 |

---

|    |    |   |           |           |           |
|----|----|---|-----------|-----------|-----------|
| 14 | 8  | 0 | -0.000000 | -2.936045 | 0.000229  |
| 15 | 1  | 0 | 2.904588  | 2.008243  | -0.000228 |
| 16 | 1  | 0 | 4.883164  | 0.548627  | -0.000358 |
| 17 | 1  | 0 | 4.602610  | -1.919164 | -0.000215 |
| 18 | 1  | 0 | 2.321433  | -2.895197 | 0.000074  |
| 19 | 1  | 0 | -2.321432 | -2.895197 | 0.000072  |
| 20 | 1  | 0 | -4.602609 | -1.919165 | -0.000212 |
| 21 | 1  | 0 | -4.883164 | 0.548626  | -0.000347 |
| 22 | 1  | 0 | -2.904588 | 2.008242  | -0.000215 |
| 23 | 14 | 0 | 0.000000  | 1.545989  | 0.000071  |
| 24 | 6  | 0 | -0.000006 | 2.623767  | -1.534563 |
| 25 | 1  | 0 | -0.882899 | 3.268147  | -1.557780 |
| 26 | 1  | 0 | 0.882886  | 3.268147  | -1.557788 |
| 27 | 1  | 0 | -0.000010 | 2.012433  | -2.439092 |
| 28 | 6  | 0 | 0.000004  | 2.623564  | 1.534847  |
| 29 | 1  | 0 | -0.882893 | 3.267936  | 1.558135  |
| 30 | 1  | 0 | 0.000014  | 2.012135  | 2.439310  |
| 31 | 1  | 0 | 0.882894  | 3.267947  | 1.558123  |

---



## Cartesian coordinates of triplet state of PC6

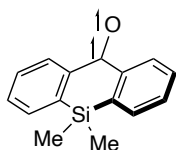

| Center Number | Atomic Number | Atomic Type | Coordinates (Angstroms) |           |           |
|---------------|---------------|-------------|-------------------------|-----------|-----------|
|               |               |             | X                       | Y         | Z         |
| 1             | 6             | 0           | 1.305662                | -1.004631 | 0.000035  |
| 2             | 6             | 0           | 1.470533                | 0.403164  | -0.000040 |
| 3             | 6             | 0           | 2.769637                | 0.914338  | -0.000180 |
| 4             | 6             | 0           | 3.890370                | 0.090082  | -0.000216 |
| 5             | 6             | 0           | 3.717383                | -1.294166 | -0.000129 |
| 6             | 6             | 0           | 2.447297                | -1.838845 | -0.000011 |
| 7             | 6             | 0           | -0.000002               | -1.622679 | 0.000133  |
| 8             | 6             | 0           | -1.305659               | -1.004625 | 0.000037  |
| 9             | 6             | 0           | -1.470533               | 0.403166  | -0.000028 |
| 10            | 6             | 0           | -2.447296               | -1.838846 | -0.000017 |
| 11            | 6             | 0           | -3.717378               | -1.294172 | -0.000131 |
| 12            | 6             | 0           | -3.890368               | 0.090081  | -0.000213 |
| 13            | 6             | 0           | -2.769641               | 0.914338  | -0.000165 |
| 14            | 8             | 0           | -0.000001               | -2.951383 | 0.000257  |
| 15            | 1             | 0           | 2.914062                | 1.991712  | -0.000266 |
| 16            | 1             | 0           | 4.885379                | 0.517982  | -0.000314 |
| 17            | 1             | 0           | 4.580074                | -1.950009 | -0.000160 |
| 18            | 1             | 0           | 2.325536                | -2.916250 | 0.000038  |
| 19            | 1             | 0           | -2.325526               | -2.916250 | 0.000022  |
| 20            | 1             | 0           | -4.580071               | -1.950011 | -0.000170 |
| 21            | 1             | 0           | -4.885381               | 0.517971  | -0.000309 |
| 22            | 1             | 0           | -2.914063               | 1.991712  | -0.000243 |
| 23            | 14            | 0           | 0.000000                | 1.559564  | 0.000122  |
| 24            | 6             | 0           | -0.000012               | 2.645818  | -1.530044 |
| 25            | 1             | 0           | -0.883054               | 3.290433  | -1.550031 |
| 26            | 1             | 0           | 0.883024                | 3.290439  | -1.550051 |
| 27            | 1             | 0           | -0.000022               | 2.038587  | -2.437254 |
| 28            | 6             | 0           | 0.000009                | 2.645624  | 1.530407  |
| 29            | 1             | 0           | -0.883030               | 3.290249  | 1.550357  |
| 30            | 1             | 0           | 0.000022                | 2.038457  | 2.437650  |
| 31            | 1             | 0           | 0.883039                | 3.290264  | 1.550341  |

---

### Cartesian coordinates of benzyl alcohol

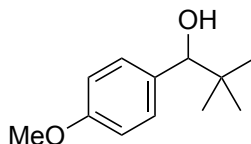

---

| Center Number | Atomic Number | Atomic Type | Coordinates (Angstroms) |           |           |
|---------------|---------------|-------------|-------------------------|-----------|-----------|
|               |               |             | X                       | Y         | Z         |
| 1             | 6             | 0           | 0.493722                | 1.232066  | -0.812129 |
| 2             | 6             | 0           | -0.172831               | 0.025550  | -0.574891 |
| 3             | 6             | 0           | 0.570814                | -1.051071 | -0.104496 |
| 4             | 6             | 0           | 1.939043                | -0.939515 | 0.142188  |
| 5             | 6             | 0           | 2.580826                | 0.276010  | -0.085866 |
| 6             | 6             | 0           | 1.849092                | 1.364202  | -0.568820 |
| 7             | 1             | 0           | -0.062581               | 2.082101  | -1.194991 |
| 8             | 1             | 0           | 0.074289                | -1.998567 | 0.073497  |
| 9             | 1             | 0           | 2.483078                | -1.800126 | 0.507211  |
| 10            | 8             | 0           | 3.905487                | 0.496580  | 0.120565  |
| 11            | 6             | 0           | 4.680908                | -0.576147 | 0.611280  |
| 12            | 1             | 0           | 5.694591                | -0.195063 | 0.711090  |
| 13            | 1             | 0           | 4.319839                | -0.910495 | 1.588940  |
| 14            | 1             | 0           | 4.676513                | -1.419464 | -0.086443 |
| 15            | 6             | 0           | -1.662855               | -0.096566 | -0.822720 |
| 16            | 1             | 0           | -1.941911               | 0.654194  | -1.577168 |
| 17            | 6             | 0           | -2.548270               | 0.175431  | 0.418223  |
| 18            | 6             | 0           | -2.279285               | 1.590552  | 0.937437  |
| 19            | 1             | 0           | -1.255723               | 1.698199  | 1.303416  |
| 20            | 1             | 0           | -2.445653               | 2.338919  | 0.155706  |
| 21            | 1             | 0           | -2.959618               | 1.815242  | 1.762927  |
| 22            | 6             | 0           | -2.267935               | -0.842373 | 1.527450  |
| 23            | 1             | 0           | -2.400229               | -1.862237 | 1.160101  |
| 24            | 1             | 0           | -1.252532               | -0.737973 | 1.917057  |
| 25            | 1             | 0           | -2.962955               | -0.683278 | 2.356382  |
| 26            | 8             | 0           | -1.999978               | -1.393817 | -1.298513 |
| 27            | 1             | 0           | -1.433742               | -1.595016 | -2.048298 |
| 28            | 6             | 0           | -4.015562               | 0.068062  | -0.015646 |

---

|    |   |   |           |           |           |
|----|---|---|-----------|-----------|-----------|
| 29 | 1 | 0 | -4.673126 | 0.298050  | 0.826932  |
| 30 | 1 | 0 | -4.236550 | 0.776845  | -0.819746 |
| 31 | 1 | 0 | -4.244265 | -0.936324 | -0.373384 |
| 32 | 1 | 0 | 2.370501  | 2.295677  | -0.751704 |

---

## Cartesian coordinates of INT0

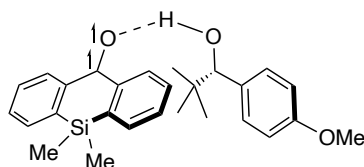

| Center Number | Atomic Number | Atomic Type | Coordinates (Angstroms) |           |           |
|---------------|---------------|-------------|-------------------------|-----------|-----------|
|               |               |             | X                       | Y         | Z         |
| 1             | 6             | 0           | 0.594712                | 1.967472  | 0.987897  |
| 2             | 6             | 0           | 0.198019                | 2.524184  | -0.254621 |
| 3             | 6             | 0           | 1.129361                | 3.285232  | -0.962004 |
| 4             | 6             | 0           | 2.412004                | 3.525091  | -0.475120 |
| 5             | 6             | 0           | 2.776688                | 3.011004  | 0.769355  |
| 6             | 6             | 0           | 1.884691                | 2.245832  | 1.497079  |
| 7             | 6             | 0           | -0.265976               | 1.072620  | 1.724706  |
| 8             | 6             | 0           | -1.564343               | 0.544602  | 1.372522  |
| 9             | 6             | 0           | -2.252319               | 0.964591  | 0.206446  |
| 10            | 6             | 0           | -2.147706               | -0.428744 | 2.213066  |
| 11            | 6             | 0           | -3.376322               | -0.981871 | 1.901095  |
| 12            | 6             | 0           | -4.051062               | -0.589312 | 0.746089  |
| 13            | 6             | 0           | -3.484454               | 0.377662  | -0.079026 |
| 14            | 8             | 0           | 0.255344                | 0.597039  | 2.857233  |
| 15            | 1             | 0           | 0.846330                | 3.708326  | -1.922363 |
| 16            | 1             | 0           | 3.114818                | 4.114357  | -1.051416 |
| 17            | 1             | 0           | 3.766446                | 3.199141  | 1.168285  |
| 18            | 1             | 0           | 2.191987                | 1.836916  | 2.453133  |
| 19            | 1             | 0           | -1.624004               | -0.753057 | 3.105752  |
| 20            | 1             | 0           | -3.809651               | -1.725881 | 2.560250  |
| 21            | 1             | 0           | -5.007446               | -1.030804 | 0.491853  |
| 22            | 1             | 0           | -4.020092               | 0.676126  | -0.976197 |
| 23            | 14            | 0           | -1.555307               | 2.322319  | -0.876616 |
| 24            | 6             | 0           | 0.356160                | -0.914490 | -1.288825 |
| 25            | 6             | 0           | 1.062720                | -1.417426 | -0.190713 |
| 26            | 6             | 0           | 0.472388                | -2.428256 | 0.559187  |
| 27            | 6             | 0           | -0.786300               | -2.936488 | 0.236048  |
| 28            | 6             | 0           | -1.470464               | -2.426621 | -0.864217 |
| 29            | 6             | 0           | -0.886865               | -1.414801 | -1.631360 |
| 30            | 1             | 0           | 0.792231                | -0.108015 | -1.872113 |
| 31            | 1             | 0           | 1.001563                | -2.828123 | 1.417466  |
| 32            | 1             | 0           | -1.217950               | -3.713039 | 0.853294  |

|    |   |   |           |           |           |
|----|---|---|-----------|-----------|-----------|
| 33 | 8 | 0 | -2.702319 | -2.839607 | -1.267052 |
| 34 | 6 | 0 | -3.329673 | -3.848746 | -0.506980 |
| 35 | 1 | 0 | -4.295383 | -4.025713 | -0.976048 |
| 36 | 1 | 0 | -2.745044 | -4.774326 | -0.518673 |
| 37 | 1 | 0 | -3.479519 | -3.524815 | 0.528120  |
| 38 | 6 | 0 | 2.424176  | -0.856509 | 0.168282  |
| 39 | 1 | 0 | 2.446141  | 0.193953  | -0.159231 |
| 40 | 6 | 0 | 3.619719  | -1.559864 | -0.519694 |
| 41 | 6 | 0 | 3.483620  | -1.441224 | -2.040011 |
| 42 | 1 | 0 | 2.612758  | -1.985891 | -2.411530 |
| 43 | 1 | 0 | 3.393453  | -0.394129 | -2.347999 |
| 44 | 1 | 0 | 4.372633  | -1.855958 | -2.522535 |
| 45 | 6 | 0 | 3.689583  | -3.035655 | -0.119428 |
| 46 | 1 | 0 | 3.744353  | -3.138179 | 0.966332  |
| 47 | 1 | 0 | 2.816054  | -3.585586 | -0.478659 |
| 48 | 1 | 0 | 4.580658  | -3.496702 | -0.554604 |
| 49 | 8 | 0 | 2.655155  | -0.923205 | 1.568949  |
| 50 | 1 | 0 | 1.868786  | -0.606440 | 2.025704  |
| 51 | 6 | 0 | 4.900249  | -0.841560 | -0.075039 |
| 52 | 1 | 0 | 5.768550  | -1.272573 | -0.581070 |
| 53 | 1 | 0 | 4.852027  | 0.222798  | -0.327382 |
| 54 | 1 | 0 | 5.042737  | -0.930491 | 1.002358  |
| 55 | 6 | 0 | -1.604033 | 1.926684  | -2.711921 |
| 56 | 1 | 0 | -2.589265 | 1.552256  | -3.003674 |
| 57 | 1 | 0 | -1.414884 | 2.832164  | -3.295236 |
| 58 | 1 | 0 | -0.859119 | 1.180835  | -2.991861 |
| 59 | 6 | 0 | -2.522244 | 3.906046  | -0.585040 |
| 60 | 1 | 0 | -3.560641 | 3.790717  | -0.908402 |
| 61 | 1 | 0 | -2.523531 | 4.167086  | 0.475358  |
| 62 | 1 | 0 | -2.083317 | 4.738264  | -1.142182 |
| 63 | 1 | 0 | -1.446790 | -1.026207 | -2.473775 |

---

## Cartesian coordinates of TS1

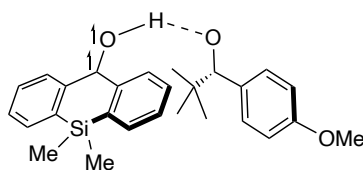

| Center<br>Number | Atomic<br>Number | Atomic<br>Type | Coordinates (Angstroms) |           |           |
|------------------|------------------|----------------|-------------------------|-----------|-----------|
|                  |                  |                | X                       | Y         | Z         |
| 1                | 6                | 0              | -2.494739               | -1.048460 | -1.118795 |
| 2                | 6                | 0              | -3.582854               | -0.604348 | -0.327969 |
| 3                | 6                | 0              | -4.609455               | -1.503191 | -0.026720 |
| 4                | 6                | 0              | -4.593888               | -2.815529 | -0.485424 |
| 5                | 6                | 0              | -3.526425               | -3.245272 | -1.272104 |
| 6                | 6                | 0              | -2.493654               | -2.378374 | -1.585116 |
| 7                | 6                | 0              | -1.337049               | -0.218567 | -1.454007 |
| 8                | 6                | 0              | -1.101983               | 1.113301  | -1.010014 |
| 9                | 6                | 0              | -2.003966               | 1.859851  | -0.163000 |
| 10               | 6                | 0              | 0.131529                | 1.750116  | -1.410478 |
| 11               | 6                | 0              | 0.455890                | 3.017207  | -0.972596 |
| 12               | 6                | 0              | -0.404514               | 3.712863  | -0.122666 |
| 13               | 6                | 0              | -1.622853               | 3.116733  | 0.262392  |
| 14               | 8                | 0              | -0.364173               | -0.775667 | -2.166519 |
| 15               | 1                | 0              | -5.445715               | -1.172397 | 0.584274  |
| 16               | 1                | 0              | -5.401351               | -3.493489 | -0.235775 |
| 17               | 1                | 0              | -3.500221               | -4.264086 | -1.641367 |
| 18               | 1                | 0              | -1.664057               | -2.713813 | -2.192862 |
| 19               | 1                | 0              | 0.797290                | 1.202251  | -2.063533 |
| 20               | 1                | 0              | 1.389262                | 3.467650  | -1.290909 |
| 21               | 1                | 0              | -0.150253               | 4.705328  | 0.228558  |
| 22               | 1                | 0              | -2.286711               | 3.682148  | 0.911833  |
| 23               | 14               | 0              | -3.677408               | 1.151802  | 0.291701  |
| 24               | 6                | 0              | 3.075495                | 0.917194  | 0.418655  |
| 25               | 6                | 0              | 2.622862                | -0.392183 | 0.203395  |
| 26               | 6                | 0              | 3.532933                | -1.339932 | -0.260284 |
| 27               | 6                | 0              | 4.866751                | -1.013385 | -0.487135 |
| 28               | 6                | 0              | 5.301299                | 0.292144  | -0.256945 |
| 29               | 6                | 0              | 4.394724                | 1.258548  | 0.197984  |
| 30               | 1                | 0              | 2.376008                | 1.675370  | 0.754728  |

|    |   |   |           |           |           |
|----|---|---|-----------|-----------|-----------|
| 31 | 1 | 0 | 3.186828  | -2.350589 | -0.443510 |
| 32 | 1 | 0 | 5.547874  | -1.776457 | -0.838334 |
| 33 | 8 | 0 | 6.571858  | 0.720065  | -0.444901 |
| 34 | 6 | 0 | 7.521082  | -0.212811 | -0.921613 |
| 35 | 1 | 0 | 8.459110  | 0.330274  | -1.007483 |
| 36 | 1 | 0 | 7.643292  | -1.043433 | -0.220039 |
| 37 | 1 | 0 | 7.232513  | -0.601299 | -1.902789 |
| 38 | 6 | 0 | 1.185366  | -0.778710 | 0.450911  |
| 39 | 1 | 0 | 0.576371  | 0.139261  | 0.216787  |
| 40 | 6 | 0 | 0.790324  | -1.105674 | 1.926597  |
| 41 | 6 | 0 | 1.152350  | 0.062824  | 2.845057  |
| 42 | 1 | 0 | 2.231455  | 0.222963  | 2.895538  |
| 43 | 1 | 0 | 0.676560  | 0.990683  | 2.508316  |
| 44 | 1 | 0 | 0.794852  | -0.146252 | 3.856747  |
| 45 | 6 | 0 | 1.520989  | -2.376449 | 2.370761  |
| 46 | 1 | 0 | 1.273513  | -3.210013 | 1.709863  |
| 47 | 1 | 0 | 2.604427  | -2.230533 | 2.362982  |
| 48 | 1 | 0 | 1.221184  | -2.640881 | 3.388519  |
| 49 | 8 | 0 | 0.775805  | -1.794937 | -0.374984 |
| 50 | 1 | 0 | 0.418427  | -1.419706 | -1.321902 |
| 51 | 6 | 0 | -0.724739 | -1.323687 | 1.960786  |
| 52 | 1 | 0 | -1.044199 | -1.570145 | 2.977287  |
| 53 | 1 | 0 | -1.249653 | -0.413038 | 1.651664  |
| 54 | 1 | 0 | -1.028415 | -2.130586 | 1.291622  |
| 55 | 6 | 0 | -3.970086 | 1.233430  | 2.145383  |
| 56 | 1 | 0 | -3.966859 | 2.269429  | 2.495655  |
| 57 | 1 | 0 | -4.943581 | 0.805094  | 2.399691  |
| 58 | 1 | 0 | -3.203085 | 0.682844  | 2.693506  |
| 59 | 6 | 0 | -5.039024 | 2.106929  | -0.580732 |
| 60 | 1 | 0 | -5.056949 | 3.149927  | -0.252393 |
| 61 | 1 | 0 | -4.889779 | 2.090700  | -1.662229 |
| 62 | 1 | 0 | -6.017382 | 1.668269  | -0.365651 |
| 63 | 1 | 0 | 4.756831  | 2.266208  | 0.360691  |

---

## Cartesian coordinates of TS2

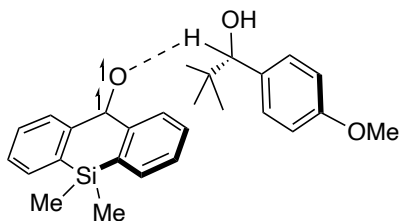

| Center Number | Atomic Number | Atomic Type | Coordinates (Angstroms) |           |           |
|---------------|---------------|-------------|-------------------------|-----------|-----------|
|               |               |             | X                       | Y         | Z         |
| 1             | 6             | 0           | -2.811116               | -0.961996 | -1.016910 |
| 2             | 6             | 0           | -3.955063               | -0.329075 | -0.466257 |
| 3             | 6             | 0           | -5.196895               | -0.946015 | -0.619698 |
| 4             | 6             | 0           | -5.337445               | -2.160343 | -1.285759 |
| 5             | 6             | 0           | -4.204204               | -2.790307 | -1.799105 |
| 6             | 6             | 0           | -2.955989               | -2.208186 | -1.663353 |
| 7             | 6             | 0           | -1.486093               | -0.369650 | -0.924025 |
| 8             | 6             | 0           | -1.202538               | 1.035935  | -0.705017 |
| 9             | 6             | 0           | -2.126266               | 1.907027  | -0.069939 |
| 10            | 6             | 0           | 0.021148                | 1.562536  | -1.176798 |
| 11            | 6             | 0           | 0.325620                | 2.902568  | -1.010680 |
| 12            | 6             | 0           | -0.572860               | 3.759638  | -0.375911 |
| 13            | 6             | 0           | -1.788246               | 3.251768  | 0.076960  |
| 14            | 8             | 0           | -0.477887               | -1.181326 | -1.231894 |
| 15            | 1             | 0           | -6.080410               | -0.472167 | -0.200728 |
| 16            | 1             | 0           | -6.314254               | -2.615918 | -1.394403 |
| 17            | 1             | 0           | -4.297746               | -3.740716 | -2.311912 |
| 18            | 1             | 0           | -2.081217               | -2.696292 | -2.075642 |
| 19            | 1             | 0           | 0.713944                | 0.916817  | -1.703833 |
| 20            | 1             | 0           | 1.266874                | 3.284395  | -1.391384 |
| 21            | 1             | 0           | -0.333582               | 4.808097  | -0.246093 |
| 22            | 1             | 0           | -2.489976               | 3.925553  | 0.560782  |
| 23            | 14            | 0           | -3.719968               | 1.192674  | 0.592893  |
| 24            | 6             | 0           | 3.033406                | 0.710583  | 0.176510  |
| 25            | 6             | 0           | 2.897272                | -0.680835 | 0.043695  |
| 26            | 6             | 0           | 4.016951                | -1.416434 | -0.345566 |
| 27            | 6             | 0           | 5.247167                | -0.804703 | -0.562847 |
| 28            | 6             | 0           | 5.365824                | 0.577370  | -0.413165 |
| 29            | 6             | 0           | 4.245708                | 1.332151  | -0.049072 |



|    |   |   |           |           |           |
|----|---|---|-----------|-----------|-----------|
| 30 | 1 | 0 | 2.173961  | 1.316162  | 0.432498  |
| 31 | 1 | 0 | 3.921588  | -2.486537 | -0.475637 |
| 32 | 1 | 0 | 6.095086  | -1.411404 | -0.850259 |
| 33 | 8 | 0 | 6.511355  | 1.273130  | -0.604945 |
| 34 | 6 | 0 | 7.667095  | 0.553538  | -0.985055 |
| 35 | 1 | 0 | 8.460515  | 1.290328  | -1.084583 |
| 36 | 1 | 0 | 7.943661  | -0.179518 | -0.221333 |
| 37 | 1 | 0 | 7.517913  | 0.046087  | -1.942772 |
| 38 | 6 | 0 | 1.593314  | -1.370331 | 0.291820  |
| 39 | 1 | 0 | 0.768658  | -0.823547 | -0.336958 |
| 40 | 6 | 0 | 1.061458  | -1.375369 | 1.763534  |
| 41 | 6 | 0 | 0.784680  | 0.035923  | 2.291856  |
| 42 | 1 | 0 | 1.704927  | 0.602829  | 2.438878  |
| 43 | 1 | 0 | 0.123276  | 0.600716  | 1.626975  |
| 44 | 1 | 0 | 0.291527  | -0.041035 | 3.264660  |
| 45 | 6 | 0 | 2.129357  | -2.053056 | 2.635975  |
| 46 | 1 | 0 | 2.363696  | -3.049647 | 2.255164  |
| 47 | 1 | 0 | 3.048951  | -1.463866 | 2.659250  |
| 48 | 1 | 0 | 1.756785  | -2.151062 | 3.659400  |
| 49 | 8 | 0 | 1.638016  | -2.655499 | -0.244520 |
| 50 | 1 | 0 | 0.731012  | -2.912418 | -0.450217 |
| 51 | 6 | 0 | -0.237383 | -2.189434 | 1.838160  |
| 52 | 1 | 0 | -0.601255 | -2.188281 | 2.868670  |
| 53 | 1 | 0 | -1.022286 | -1.765588 | 1.206501  |
| 54 | 1 | 0 | -0.079595 | -3.232230 | 1.553360  |
| 55 | 6 | 0 | -3.471042 | 0.668937  | 2.380859  |
| 56 | 1 | 0 | -3.251374 | 1.532660  | 3.014366  |
| 57 | 1 | 0 | -4.360117 | 0.168778  | 2.773914  |
| 58 | 1 | 0 | -2.630064 | -0.026649 | 2.451188  |
| 59 | 6 | 0 | -5.150304 | 2.396262  | 0.456956  |
| 60 | 1 | 0 | -4.973527 | 3.283781  | 1.070268  |
| 61 | 1 | 0 | -5.297351 | 2.716712  | -0.576330 |
| 62 | 1 | 0 | -6.078595 | 1.939372  | 0.809979  |
| 63 | 1 | 0 | 4.355313  | 2.405703  | 0.043590  |

---

## Cartesian coordinates of SiBP radical

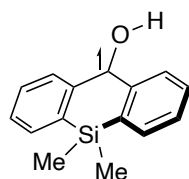

| Center<br>Number | Atomic<br>Number | Atomic<br>Type | Coordinates (Angstroms) |           |           |
|------------------|------------------|----------------|-------------------------|-----------|-----------|
|                  |                  |                | X                       | Y         | Z         |
| 1                | 6                | 0              | -1.299733               | -0.979329 | 0.013549  |
| 2                | 6                | 0              | -1.468147               | 0.427229  | -0.069606 |
| 3                | 6                | 0              | -2.758530               | 0.943234  | -0.199111 |
| 4                | 6                | 0              | -3.879167               | 0.121138  | -0.245345 |
| 5                | 6                | 0              | -3.710603               | -1.259776 | -0.148352 |
| 6                | 6                | 0              | -2.446711               | -1.805331 | -0.017449 |
| 7                | 6                | 0              | -0.003752               | -1.606776 | 0.122667  |
| 8                | 6                | 0              | 1.292446                | -0.985946 | 0.001621  |
| 9                | 6                | 0              | 1.463097                | 0.426571  | -0.002009 |
| 10               | 6                | 0              | 2.447986                | -1.795716 | -0.125157 |
| 11               | 6                | 0              | 3.713232                | -1.240949 | -0.203898 |
| 12               | 6                | 0              | 3.880175                | 0.141302  | -0.173944 |
| 13               | 6                | 0              | 2.751624                | 0.951474  | -0.086881 |
| 14               | 8                | 0              | -0.063661               | -2.955473 | 0.289499  |
| 15               | 1                | 0              | -2.896239               | 2.019677  | -0.261150 |
| 16               | 1                | 0              | -4.869403               | 0.548085  | -0.349082 |
| 17               | 1                | 0              | -4.573778               | -1.914749 | -0.176035 |
| 18               | 1                | 0              | -2.326040               | -2.877385 | 0.055047  |
| 19               | 1                | 0              | 2.369293                | -2.873444 | -0.218593 |
| 20               | 1                | 0              | 4.574148                | -1.891355 | -0.305687 |
| 21               | 1                | 0              | 4.869446                | 0.577892  | -0.234043 |
| 22               | 1                | 0              | 2.883739                | 2.030447  | -0.086753 |
| 23               | 14               | 0              | -0.007911               | 1.577835  | 0.092077  |
| 24               | 6                | 0              | -0.048626               | 2.477270  | 1.740101  |
| 25               | 1                | 0              | 0.836991                | 3.107075  | 1.862201  |
| 26               | 1                | 0              | -0.931286               | 3.118943  | 1.810045  |
| 27               | 1                | 0              | -0.078660               | 1.765893  | 2.567936  |
| 28               | 6                | 0              | 0.040354                | 2.838231  | -1.297847 |
| 29               | 1                | 0              | 0.918724                | 3.483629  | -1.211406 |
| 30               | 1                | 0              | 0.073111                | 2.344141  | -2.270719 |

|    |   |   |           |           |           |
|----|---|---|-----------|-----------|-----------|
| 31 | 1 | 0 | -0.843513 | 3.481389  | -1.270514 |
| 32 | 1 | 0 | 0.771648  | -3.281890 | 0.633649  |

---

### Cartesian coordinates of alkoxy radical

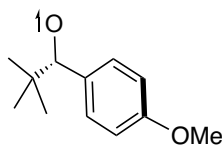


---

| Center Number | Atomic Number | Atomic Type | Coordinates (Angstroms) |           |           |
|---------------|---------------|-------------|-------------------------|-----------|-----------|
|               |               |             | X                       | Y         | Z         |
| 1             | 6             | 0           | 0.473867                | 1.271995  | -0.723247 |
| 2             | 6             | 0           | -0.174116               | 0.040064  | -0.603801 |
| 3             | 6             | 0           | 0.576133                | -1.068136 | -0.234272 |
| 4             | 6             | 0           | 1.939099                | -0.961789 | 0.039176  |
| 5             | 6             | 0           | 2.565949                | 0.278667  | -0.065655 |
| 6             | 6             | 0           | 1.825446                | 1.397905  | -0.454565 |
| 7             | 1             | 0           | -0.089188               | 2.146587  | -1.034843 |
| 8             | 1             | 0           | 0.091043                | -2.035803 | -0.173896 |
| 9             | 1             | 0           | 2.493133                | -1.846687 | 0.321627  |
| 10            | 8             | 0           | 3.885278                | 0.495614  | 0.176407  |
| 11            | 6             | 0           | 4.673251                | -0.611529 | 0.559041  |
| 12            | 1             | 0           | 5.681184                | -0.229285 | 0.702965  |
| 13            | 1             | 0           | 4.312733                | -1.048967 | 1.495370  |
| 14            | 1             | 0           | 4.682945                | -1.378834 | -0.221374 |
| 15            | 6             | 0           | -1.658362               | -0.081472 | -0.885414 |
| 16            | 1             | 0           | -1.981980               | 0.724412  | -1.565679 |
| 17            | 6             | 0           | -2.581879               | 0.117985  | 0.405126  |
| 18            | 6             | 0           | -2.270052               | 1.483849  | 1.017014  |
| 19            | 1             | 0           | -1.245281               | 1.537540  | 1.388236  |
| 20            | 1             | 0           | -2.421965               | 2.290328  | 0.293731  |
| 21            | 1             | 0           | -2.946650               | 1.656556  | 1.858667  |
| 22            | 6             | 0           | -2.311628               | -0.985221 | 1.429317  |
| 23            | 1             | 0           | -2.520144               | -1.973258 | 1.013247  |
| 24            | 1             | 0           | -1.275414               | -0.962422 | 1.773285  |
| 25            | 1             | 0           | -2.958086               | -0.836124 | 2.298600  |

|    |   |   |           |           |           |
|----|---|---|-----------|-----------|-----------|
| 26 | 8 | 0 | -2.009600 | -1.291752 | -1.397575 |
| 27 | 6 | 0 | -4.044392 | 0.077104  | -0.045455 |
| 28 | 1 | 0 | -4.696103 | 0.278549  | 0.808952  |
| 29 | 1 | 0 | -4.241111 | 0.837969  | -0.805971 |
| 30 | 1 | 0 | -4.307137 | -0.896156 | -0.460522 |
| 31 | 1 | 0 | 2.336710  | 2.348161  | -0.546643 |

---

### Cartesian coordinates of INT1

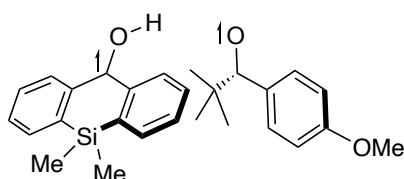


---

| Center Number | Atomic Number | Atomic Type | Coordinates (Angstroms) |           |           |
|---------------|---------------|-------------|-------------------------|-----------|-----------|
|               |               |             | X                       | Y         | Z         |
| 1             | 6             | 0           | -0.396275               | 2.058141  | -0.291391 |
| 2             | 6             | 0           | -0.023438               | 0.346574  | 1.397474  |
| 3             | 6             | 0           | -1.172740               | -0.319808 | 0.999607  |
| 4             | 6             | 0           | -1.934739               | 0.209559  | -0.057325 |
| 5             | 6             | 0           | -1.537161               | 1.404619  | -0.700710 |
| 6             | 1             | 0           | -0.092445               | 2.978383  | -0.780136 |
| 7             | 1             | 0           | 0.574786                | -0.058953 | 2.208280  |
| 8             | 1             | 0           | -1.466683               | -1.237212 | 1.495237  |
| 9             | 1             | 0           | -2.152781               | 1.784378  | -1.509941 |
| 10            | 6             | 0           | -3.515774               | -1.566370 | 0.063798  |
| 11            | 1             | 0           | -4.421979               | -1.832462 | -0.478069 |
| 12            | 1             | 0           | -2.770134               | -2.359185 | -0.049211 |
| 13            | 1             | 0           | -3.748527               | -1.414657 | 1.122085  |
| 14            | 8             | 0           | -3.054713               | -0.353042 | -0.529724 |
| 15            | 6             | 0           | 1.639546                | -0.452973 | -1.056370 |
| 16            | 6             | 0           | 3.074486                | -1.257219 | 0.208676  |
| 17            | 7             | 0           | 2.348118                | 0.607186  | -0.508106 |
| 18            | 1             | 0           | 0.821020                | -0.289382 | -1.745708 |
| 19            | 1             | 0           | 3.703766                | -1.965049 | 0.731763  |
| 20            | 6             | 0           | 0.386764                | 1.534874  | 0.762179  |
| 21            | 1             | 0           | 1.226300                | 2.098439  | 1.150222  |

---

|    |   |   |          |           |           |
|----|---|---|----------|-----------|-----------|
| 22 | 7 | 0 | 2.088434 | -1.624289 | -0.658251 |
| 23 | 7 | 0 | 3.226360 | 0.070769  | 0.328877  |

---

### Cartesian coordinates of benzyl radical

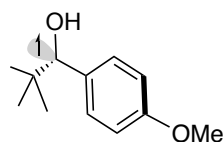


---

| Center Number | Atomic Number | Atomic Type | Coordinates (Angstroms) |           |           |
|---------------|---------------|-------------|-------------------------|-----------|-----------|
|               |               |             | X                       | Y         | Z         |
| 1             | 6             | 0           | 0.428322                | 1.137731  | -0.000293 |
| 2             | 6             | 0           | -0.097589               | -0.185458 | -0.000138 |
| 3             | 6             | 0           | 0.866784                | -1.228238 | 0.000008  |
| 4             | 6             | 0           | 2.231308                | -0.982575 | 0.000058  |
| 5             | 6             | 0           | 2.707277                | 0.327705  | -0.000058 |
| 6             | 6             | 0           | 1.784262                | 1.378782  | -0.000246 |
| 7             | 1             | 0           | -0.220516               | 1.996244  | -0.000509 |
| 8             | 1             | 0           | 0.525169                | -2.253102 | 0.000111  |
| 9             | 1             | 0           | 2.910822                | -1.824770 | 0.000188  |
| 10            | 8             | 0           | 4.021504                | 0.680301  | -0.000034 |
| 11            | 6             | 0           | 4.973663                | -0.360260 | 0.000269  |
| 12            | 1             | 0           | 5.949189                | 0.120977  | 0.000309  |
| 13            | 1             | 0           | 4.876480                | -0.985731 | 0.893508  |
| 14            | 1             | 0           | 4.876716                | -0.986044 | -0.892775 |
| 15            | 6             | 0           | -1.477747               | -0.545473 | -0.000205 |
| 16            | 6             | 0           | -2.768990               | 0.256065  | 0.000090  |
| 17            | 6             | 0           | -2.595877               | 1.776800  | 0.000426  |
| 18            | 1             | 0           | -2.070952               | 2.124355  | 0.891485  |
| 19            | 1             | 0           | -2.071509               | 2.124835  | -0.890775 |
| 20            | 1             | 0           | -3.587724               | 2.235634  | 0.000840  |
| 21            | 6             | 0           | -3.586746               | -0.110662 | 1.259519  |
| 22            | 1             | 0           | -3.834310               | -1.174368 | 1.313896  |
| 23            | 1             | 0           | -3.030637               | 0.147577  | 2.163187  |
| 24            | 1             | 0           | -4.530631               | 0.440673  | 1.261508  |
| 25            | 8             | 0           | -1.673163               | -1.904977 | -0.000395 |
| 26            | 1             | 0           | -2.611272               | -2.104036 | -0.000319 |

---

|    |   |   |           |           |           |
|----|---|---|-----------|-----------|-----------|
| 27 | 6 | 0 | -3.587053 | -0.110143 | -1.259276 |
| 28 | 1 | 0 | -4.530916 | 0.441235  | -1.260833 |
| 29 | 1 | 0 | -3.031144 | 0.148413  | -2.162977 |
| 30 | 1 | 0 | -3.834664 | -1.173820 | -1.313964 |
| 31 | 1 | 0 | 2.163487  | 2.393694  | -0.000380 |

---

### Cartesian coordinates of INT2

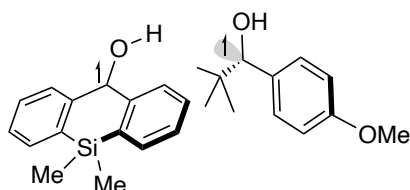


---

| Center Number | Atomic Number | Atomic Type | Coordinates (Angstroms) |           |           |
|---------------|---------------|-------------|-------------------------|-----------|-----------|
|               |               |             | X                       | Y         | Z         |
| 1             | 8             | 0           | 0.063382                | -1.504391 | -1.196842 |
| 2             | 6             | 0           | -0.550059               | 0.491545  | -0.141887 |
| 3             | 7             | 0           | -1.353205               | 1.570778  | 0.085744  |
| 4             | 6             | 0           | -0.555355               | 2.634535  | 0.390794  |
| 5             | 7             | 0           | 0.703683                | 2.320148  | 0.392649  |
| 6             | 7             | 0           | 0.709335                | 0.979892  | 0.063264  |
| 7             | 6             | 0           | -2.174530               | -1.425112 | -0.362442 |
| 8             | 6             | 0           | -2.558252               | -2.568982 | -1.086095 |
| 9             | 6             | 0           | -3.788635               | -3.149038 | -0.817688 |
| 10            | 6             | 0           | -4.607162               | -2.583933 | 0.163502  |
| 11            | 6             | 0           | -4.139457               | -1.455494 | 0.834038  |
| 12            | 1             | 0           | -4.742802               | -0.990707 | 1.611556  |
| 13            | 1             | 0           | -5.575444               | -3.006060 | 0.409384  |
| 14            | 1             | 0           | -4.111002               | -4.030150 | -1.365128 |
| 15            | 1             | 0           | -1.885661               | -2.968606 | -1.836597 |
| 16            | 6             | 0           | -2.762519               | 1.943762  | -0.080235 |
| 17            | 1             | 0           | -3.172603               | 1.476665  | -0.977154 |
| 18            | 1             | 0           | -3.326601               | 1.602441  | 0.788841  |
| 19            | 6             | 0           | -0.843726               | -0.837704 | -0.609837 |
| 20            | 7             | 0           | -2.955799               | -0.886766 | 0.592943  |
| 21            | 6             | 0           | 1.949212                | 0.265404  | 0.104543  |

|    |   |   |           |           |           |
|----|---|---|-----------|-----------|-----------|
| 22 | 6 | 0 | 2.904027  | 0.531021  | -0.885421 |
| 23 | 6 | 0 | 2.175482  | -0.638749 | 1.145247  |
| 24 | 6 | 0 | 4.118572  | -0.149231 | -0.813326 |
| 25 | 6 | 0 | 3.406541  | -1.302150 | 1.171547  |
| 26 | 6 | 0 | 4.386537  | -1.070632 | 0.205773  |
| 27 | 1 | 0 | 4.871352  | 0.036938  | -1.576873 |
| 28 | 1 | 0 | 3.601241  | -2.012200 | 1.972309  |
| 29 | 6 | 0 | 1.131573  | -0.906961 | 2.195436  |
| 30 | 1 | 0 | 0.674307  | 0.021752  | 2.551824  |
| 31 | 1 | 0 | 0.328785  | -1.538238 | 1.796905  |
| 32 | 1 | 0 | 1.575260  | -1.423787 | 3.049288  |
| 33 | 6 | 0 | 2.616452  | 1.503350  | -1.997691 |
| 34 | 1 | 0 | 1.663442  | 1.269743  | -2.484052 |
| 35 | 1 | 0 | 2.547980  | 2.528604  | -1.620383 |
| 36 | 1 | 0 | 3.406949  | 1.465337  | -2.750378 |
| 37 | 6 | 0 | 5.712641  | -1.785428 | 0.253495  |
| 38 | 1 | 0 | 5.910295  | -2.304427 | -0.689755 |
| 39 | 1 | 0 | 6.531664  | -1.076463 | 0.414248  |
| 40 | 1 | 0 | 5.735985  | -2.521201 | 1.061036  |
| 41 | 6 | 0 | -1.371804 | 3.870674  | 0.579126  |
| 42 | 1 | 0 | -1.558490 | 4.028407  | 1.646331  |
| 43 | 1 | 0 | -0.883334 | 4.757547  | 0.175064  |
| 44 | 6 | 0 | -2.666322 | 3.482048  | -0.175715 |
| 45 | 1 | 0 | -2.574067 | 3.775167  | -1.224887 |
| 46 | 1 | 0 | -3.551702 | 3.962441  | 0.241972  |

---

### Cartesian coordinates of TS3

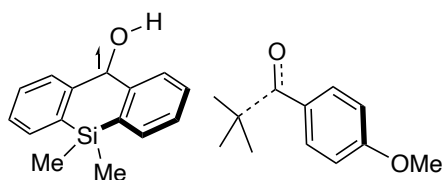


---

| Center Number | Atomic Number | Atomic Type | Coordinates (Angstroms) |           |           |
|---------------|---------------|-------------|-------------------------|-----------|-----------|
|               |               |             | X                       | Y         | Z         |
| 1             | 6             | 0           | 12.959357               | 0.675645  | -1.116248 |
| 2             | 6             | 0           | 12.220435               | -0.433602 | -0.696147 |

---

|    |   |   |            |           |           |
|----|---|---|------------|-----------|-----------|
| 3  | 6 | 0 | 12.640665  | -1.128788 | 0.432153  |
| 4  | 6 | 0 | 13.761385  | -0.723638 | 1.150920  |
| 5  | 6 | 0 | 14.481752  | 0.394522  | 0.726516  |
| 6  | 6 | 0 | 14.078340  | 1.090664  | -0.416886 |
| 7  | 1 | 0 | 12.656190  | 1.214771  | -2.008805 |
| 8  | 1 | 0 | 12.081352  | -2.006353 | 0.737105  |
| 9  | 1 | 0 | 14.065067  | -1.285415 | 2.023819  |
| 10 | 8 | 0 | 15.587252  | 0.874083  | 1.350341  |
| 11 | 6 | 0 | 16.042446  | 0.194226  | 2.501746  |
| 12 | 1 | 0 | 16.925389  | 0.731844  | 2.839320  |
| 13 | 1 | 0 | 15.285461  | 0.204544  | 3.292013  |
| 14 | 1 | 0 | 16.312698  | -0.840229 | 2.268710  |
| 15 | 6 | 0 | 11.018300  | -0.893775 | -1.459999 |
| 16 | 1 | 0 | 10.889602  | -0.386981 | -2.435628 |
| 17 | 6 | 0 | 9.484099   | 0.163049  | -0.705819 |
| 18 | 6 | 0 | 9.865924   | 1.609614  | -0.871683 |
| 19 | 1 | 0 | 10.720050  | 1.882567  | -0.250914 |
| 20 | 1 | 0 | 10.084487  | 1.857209  | -1.913640 |
| 21 | 1 | 0 | 9.012893   | 2.227505  | -0.561323 |
| 22 | 6 | 0 | 9.384481   | -0.302220 | 0.720816  |
| 23 | 1 | 0 | 9.256842   | -1.384568 | 0.769564  |
| 24 | 1 | 0 | 10.264798  | -0.016478 | 1.299632  |
| 25 | 1 | 0 | 8.509501   | 0.170447  | 1.185364  |
| 26 | 8 | 0 | 10.584535  | -2.063263 | -1.320557 |
| 27 | 6 | 0 | 8.352753   | -0.286929 | -1.592876 |
| 28 | 1 | 0 | 7.433769   | 0.225609  | -1.281909 |
| 29 | 1 | 0 | 8.536521   | -0.031325 | -2.639267 |
| 30 | 1 | 0 | 8.197566   | -1.362368 | -1.516480 |
| 31 | 1 | 0 | 14.664729  | 1.944077  | -0.734019 |
| 32 | 6 | 0 | -11.142317 | -1.107312 | 0.259967  |
| 33 | 6 | 0 | -11.505848 | 0.263077  | 0.199904  |
| 34 | 6 | 0 | -12.858243 | 0.603070  | 0.260111  |
| 35 | 6 | 0 | -13.854822 | -0.359336 | 0.380194  |
| 36 | 6 | 0 | -13.492495 | -1.703991 | 0.453995  |
| 37 | 6 | 0 | -12.161928 | -2.076674 | 0.399282  |
| 38 | 6 | 0 | -9.772680  | -1.557178 | 0.178013  |
| 39 | 6 | 0 | -8.602219  | -0.774869 | -0.135451 |
| 40 | 6 | 0 | -8.622488  | 0.647504  | -0.166117 |
| 41 | 6 | 0 | -7.381173  | -1.429066 | -0.432404 |
| 42 | 6 | 0 | -6.226164  | -0.715351 | -0.699587 |
| 43 | 6 | 0 | -6.241108  | 0.677182  | -0.696342 |



|    |    |   |            |           |           |
|----|----|---|------------|-----------|-----------|
| 44 | 6  | 0 | -7.441609  | 1.334461  | -0.442783 |
| 45 | 8  | 0 | -9.628180  | -2.898205 | 0.354594  |
| 46 | 1  | 0 | -13.144826 | 1.650710  | 0.216978  |
| 47 | 1  | 0 | -14.897406 | -0.067995 | 0.422017  |
| 48 | 1  | 0 | -14.256103 | -2.466676 | 0.554199  |
| 49 | 1  | 0 | -11.891153 | -3.121982 | 0.455338  |
| 50 | 1  | 0 | -7.329592  | -2.509523 | -0.512116 |
| 51 | 1  | 0 | -5.311356  | -1.249552 | -0.928360 |
| 52 | 1  | 0 | -5.338272  | 1.238019  | -0.904290 |
| 53 | 1  | 0 | -7.454952  | 2.421211  | -0.463799 |
| 54 | 14 | 0 | -10.203136 | 1.597964  | 0.144015  |
| 55 | 6  | 0 | -10.121494 | 2.516620  | 1.779868  |
| 56 | 1  | 0 | -9.318910  | 3.259323  | 1.770374  |
| 57 | 1  | 0 | -11.061778 | 3.038285  | 1.978558  |
| 58 | 1  | 0 | -9.936232  | 1.823832  | 2.603261  |
| 59 | 6  | 0 | -10.525946 | 2.826278  | -1.238014 |
| 60 | 1  | 0 | -9.739370  | 3.584603  | -1.280029 |
| 61 | 1  | 0 | -10.567480 | 2.322204  | -2.205399 |
| 62 | 1  | 0 | -11.475179 | 3.346217  | -1.082325 |
| 63 | 1  | 0 | -8.715678  | -3.105047 | 0.572043  |

### Cartesian coordinates of *t*Bu radical

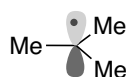

| Center Number | Atomic Number | Atomic Type | Coordinates (Angstroms) |           |           |
|---------------|---------------|-------------|-------------------------|-----------|-----------|
|               |               |             | X                       | Y         | Z         |
| 1             | 6             | 0           | -0.000018               | 0.000014  | -0.183509 |
| 2             | 6             | 0           | 1.200223                | 0.865806  | 0.019138  |
| 3             | 1             | 0           | 1.058984                | 1.857184  | -0.419091 |
| 4             | 1             | 0           | 1.410367                | 1.017241  | 1.090553  |
| 5             | 1             | 0           | 2.096363                | 0.419133  | -0.419306 |
| 6             | 6             | 0           | 0.149709                | -1.472298 | 0.019140  |
| 7             | 1             | 0           | -0.685659               | -2.025018 | -0.418416 |
| 8             | 1             | 0           | 1.078416                | -1.845812 | -0.419974 |
| 9             | 1             | 0           | 0.176894                | -1.729893 | 1.090553  |

|    |   |   |           |           |           |
|----|---|---|-----------|-----------|-----------|
| 10 | 6 | 0 | -1.349937 | 0.606495  | 0.019140  |
| 11 | 1 | 0 | -1.586445 | 0.711995  | 1.090577  |
| 12 | 1 | 0 | -1.410995 | 1.606217  | -0.418609 |
| 13 | 1 | 0 | -2.137790 | -0.011151 | -0.419746 |

---

### Cartesian coordinates of anisaldehyde

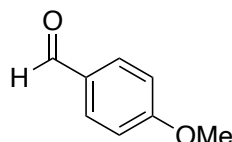

| Center Number | Atomic Number | Atomic Type | Coordinates (Angstroms) |           |           |
|---------------|---------------|-------------|-------------------------|-----------|-----------|
|               |               |             | X                       | Y         | Z         |
| 1             | 6             | 0           | -0.803116               | 1.413869  | -0.000259 |
| 2             | 6             | 0           | -1.470549               | 0.185372  | -0.000201 |
| 3             | 6             | 0           | -0.730343               | -0.994727 | 0.000239  |
| 4             | 6             | 0           | 0.656474                | -0.962080 | 0.000657  |
| 5             | 6             | 0           | 1.313610                | 0.274049  | 0.000619  |
| 6             | 6             | 0           | 0.577121                | 1.464122  | 0.000243  |
| 7             | 1             | 0           | -1.377107               | 2.335333  | -0.000713 |
| 8             | 1             | 0           | -1.260624               | -1.940267 | 0.000384  |
| 9             | 1             | 0           | 1.213101                | -1.889069 | 0.001177  |
| 10            | 8             | 0           | 2.656648                | 0.417133  | 0.000877  |
| 11            | 6             | 0           | 3.453910                | -0.751736 | -0.001182 |
| 12            | 1             | 0           | 4.485743                | -0.409490 | -0.002715 |
| 13            | 1             | 0           | 3.270383                | -1.354380 | 0.892978  |
| 14            | 1             | 0           | 3.267323                | -1.353303 | -0.895419 |
| 15            | 6             | 0           | -2.946569               | 0.145582  | -0.000560 |
| 16            | 1             | 0           | 1.116516                | 2.402751  | 0.000266  |
| 17            | 8             | 0           | -3.604107               | -0.864296 | 0.000149  |
| 18            | 1             | 0           | -3.438892               | 1.139023  | -0.001503 |

---

## Calculated BDFEs

The BEFE was calculated as follows:  $BDFE(A-H) = G^\circ(A^\bullet) + G^\circ(H^\bullet) - G^\circ(A-H)$

Where:

$G^\circ(A^\bullet)$  is the Gibbs free energy of the radical  $A^\bullet$

$G^\circ(H^\bullet)$  is the Gibbs free energy of the hydrogen radical

$G^\circ(A-H)$  is the Gibbs free energy of the  $A-H$  molecule

| substrate                                                                           | X radical                                                                           | Free Energy of substrate (Hartree) | Free Energy of X radical (Hartree) | Free Energy of H radical (Hartree) | calculated BDFE (kcal/mol) |
|-------------------------------------------------------------------------------------|-------------------------------------------------------------------------------------|------------------------------------|------------------------------------|------------------------------------|----------------------------|
| 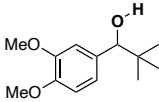   |    | -618.21901                         | -617.55805                         | -0.50885                           | 95.5                       |
|    |    | -916.69869                         | -916.05973                         | -0.50885                           | 81.6                       |
|   |   | -983.80913                         | -983.19273                         | -0.50885                           | 67.5                       |
|  |  | -973.95796                         | -973.29152                         | -0.50885                           | 98.9                       |
|  |  | -1779.8772                         | -1779.2157                         | -0.50885                           | 95.8                       |

## Supplementary References

- (1) Campbell, M. W.; Yuan, M.; Polites, V. C.; Gutierrez, O.; Molander, G. A. Photochemical C–H Activation Enables Nickel-Catalyzed Olefin Dicarbofunctionalization. *J. Am. Chem. Soc.* **2021**, *143*, 3901–3910. <https://doi.org/10.1021/jacs.0c13077>.
- (2) Erchinger, J. E.; Hoogesteger, R.; Laskar, R.; Dutta, S.; Hümpel, C.; Rana, D.; Daniliuc, C. G.; Glorius, F. EnT-Mediated N–S Bond Homolysis of a Bifunctional Reagent Leading to Aliphatic Sulfonyl Fluorides. *J. Am. Chem. Soc.* **2023**, *145*, 2364–2374. <https://doi.org/10.1021/jacs.2c11295>.
- (3) Zhao, K.; Wang, H.; Li, T.; Liu, S.; Benassi, E.; Li, X.; Yao, Y.; Wang, X.; Cui, X.; Shi, F. Identification of a Potent Palladium-Aryldiphosphine Catalytic System for High-Performance Carbonylation of Alkenes. *Nat. Commun.* **2024**, *15*. <https://doi.org/10.1038/s41467-024-46286-9>.

- (4) Hertz, V. M.; Ando, N.; Hirai, M.; Bolte, M.; Lerner, H.-W.; Yamaguchi, S.; Wagner, M. Steric Shielding vs Structural Constraint in a Boron-Containing Polycyclic Aromatic Hydrocarbon. *Organomet.* **2016**, *36*, 2512–2519. <https://doi.org/10.1021/acs.organomet.6b00800>.
- (5) Bomon, J.; Van Den Broeck, E.; Bal, M.; Liao, Y.; Sergeev, S.; Van Speybroeck, V.; Sels, B. F.; Maes, B. U. W. Brønsted Acid Catalyzed Tandem Defunctionalization of Biorenewable Ferulic Acid and Derivates into Bio-Catechol. *Angew. Chem. Int. Ed.* **2020**, *59*, 3063–3068. <https://doi.org/10.1002/anie.201913023>.
- (6) Liang, J.; Wang, M.; Zhao, Y.; Yan, W.; Si, X.; Yu, G.; Cao, J.; Wei, X. Nano WO<sub>3</sub>-Catalyzed One-Pot Process for Mild Oxidative Depolymerization of Lignin and Its Model Compounds. *ChemCatChem* **2021**, *13*, 3836–3845. <https://doi.org/10.1002/cctc.202100670>.
- (7) Wu, H.; Li, X.; Yang, L.; Chen, W.; Zou, C.; Deng, W.; Wang, Z.; Hu, J.; Li, Y.; Huang, Y. Cathodic Carbonyl Alkylation of Aryl Ketones or Aldehydes with Unactivated Alkyl Halides. *Org. Lett.* **2022**, *24*, 9342–9347. <https://doi.org/10.1021/acs.orglett.2c04019>.
- (8) Reddel, J. C. T.; Wang, W.; Koukounas, K.; Thomson, R. J. Triflimide-Catalyzed Allylsilane Annulations of Benzylic Alcohols for the Divergent Synthesis of Indanes and Tetralins. *Chem. Sci.* **2017**, *8*, 2156–2160. <https://doi.org/10.1039/c6sc04762a>.
- (9) Suh, S. M.; Jambu, S.; Chin, M. T.; Diao, T. Selective Cleavage of Lignin Model Compounds via a Reverse Biosynthesis Mechanism. *Org. Lett.* **2023**, *25*, 4792–4796. <https://doi.org/10.1021/acs.orglett.3c01416>.
- (10) Liu, C.; Han, J.; Marcelina, O.; Nugrahaningrum, D. A.; Huang, S.; Zou, M.; Wang, G.; Miyagishi, M.; He, Y.; Wu, S.; Kasim, V. Discovery of Salidroside-Derived Glycoside Analogues as Novel Angiogenesis Agents to Treat Diabetic Hind Limb Ischemia. *J. Med. Chem.* **2021**, *65*, 135–162. <https://doi.org/10.1021/acs.jmedchem.1c00947>.
- (11) Antico, E.; Schlichter, P.; Werlé, C.; Leitner, W. Reduction of Carboxylic Acids to Alcohols via Manganese(I) Catalyzed Hydrosilylation. *JACS Au* **2021**, *1*, 742–749. <https://doi.org/10.1021/jacsau.1c00140>.
- (12) Drymon, M.; Kaplanai, E.; Vougioukalakis, G. C. An In-Situ-Formed Copper-Based Perfluorinated Catalytic System for the Aerobic Oxidation of Alcohols. *Eur. J. Org. Chem.* **2024**, *27*. <https://doi.org/10.1002/ejoc.202301179>.
- (13) Benischke, A. D.; Anthore-Dalion, L.; Berionni, G.; Knochel, P. Preparation of Functionalized Diaryl- and Diheteroaryllanthanum Reagents by Fast Halogen–Lanthanum Exchange. *Angew. Chem. Int. Ed.* **2017**, *56*, 16390–16394. <https://doi.org/10.1002/anie.201709553>.
- (14) Mandal, A.; Ganguli, K.; Pradhan, M.; Gorai, A.; Kundu, S. Selective Transfer Hydrogenation of C=O and Conjugated C=C Bonds Using An NHC-Based Pincer (CNC)MnI Complex in Methanol\*\*. *ChemSusChem* **2023**, *16*. <https://doi.org/10.1002/cssc.202300683>.
- (15) Pieber, B.; Malik, J. A.; Cavedon, C.; Gisbertz, S.; Savateev, A.; Cruz, D.; Heil, T.; Zhang, G.; Seeberger, P. H. Semi-heterogeneous Dual Nickel/Photocatalysis Using Carbon Nitrides: Esterification of Carboxylic Acids with Aryl Halides. *Angew. Chem. Int. Ed.* **2019**, *58*, 9575–9580. <https://doi.org/10.1002/anie.201902785>.

- (16) Wang, L.; Yu, J.; Duan, Z.; Jin, J.; Zhang, Y. Cobalt-Catalyzed Synthesis of Aryl Ketones and Aldehydes from Redox-Active Esters. *Org. Biomol. Chem.* **2022**, *20*, 6554–6557. <https://doi.org/10.1039/d2ob01275h>.
- (17) Borthakur, I.; Joshi, A.; Kumari, S.; Kundu, S. Metal-Free Visible-Light Induced Oxidative Cleavage of C(Sp<sup>3</sup>)–C, and C(Sp<sup>3</sup>)–N Bonds of Nitriles, Alcohols, and Amines. *Chem. Eur. J.* **2024**, *30*. <https://doi.org/10.1002/chem.202303295>.
- (18) Dilauro, G.; Azzollini, C. S.; Vitale, P.; Salomone, A.; Perna, F. M.; Capriati, V. Scalable Negishi Coupling between Organozinc Compounds and (Hetero)Aryl Bromides under Aerobic Conditions When Using Bulk Water or Deep Eutectic Solvents with No Additional Ligands. *Angew. Chem. Int. Ed.* **2021**, *60*, 10632–10636. <https://doi.org/10.1002/anie.202101571>.
- (19) Davenport, E.; Negru, D. E.; Badman, G.; Lindsay, D. M.; Kerr, W. J. Robust and General Late-Stage Methylation of Aryl Chlorides: Application to Isotopic Labeling of Drug-like Scaffolds. *ACS Catal.* **2023**, *13*, 11541–11547. <https://doi.org/10.1021/acscatal.3c02761>.
- (20) Brandhofer, T.; Mancheño, O. G. Versatile Ru-Photoredox-Catalyzed Functionalization of Dehydro-Amino Acids and Peptides. *ChemCatChem* **2019**, *11*, 3797–3801. <https://doi.org/10.1002/cctc.201900446>.
- (21) Kemmochi, M.; Miyamoto, Y.; Sumida, Y.; Ohmiya, H. Direct Photoexcitation of Borate Enabling Minisci Reaction. *Asian J. Org. Chem.* **2021**, *11*. <https://doi.org/10.1002/ajoc.202100640>.
- (22) Gaussian 16, Revision C.01, Frisch, M. J.; Trucks, G. W.; Schlegel, H. B.; Scuseria, G. E.; Robb, M. A.; Cheeseman, J. R.; Scalmani, G.; Barone, V.; Petersson, G. A.; Nakatsuji, H.; Li, X.; Caricato, M.; Marenich, A. V.; Bloino, J.; Janesko, B. G.; Gomperts, R.; Mennucci, B.; Hratchian, H. P.; Ortiz, J. V.; Izmaylov, A. F.; Sonnenberg, J. L.; Williams-Young, D.; Ding, F.; Lipparini, F.; Egidi, F.; Goings, J.; Peng, B.; Petrone, A.; Henderson, T.; Ranasinghe, D.; Zakrzewski, V. G.; Gao, J.; Rega, N.; Zheng, G.; Liang, W.; Hada, M.; Ehara, M.; Toyota, K.; Fukuda, R.; Hasegawa, J.; Ishida, M.; Nakajima, T.; Honda, Y.; Kitao, O.; Nakai, H.; Vreven, T.; Throssell, K.; Montgomery, J. A., Jr.; Peralta, J. E.; Ogliaro, F.; Bearpark, M.; Heyd, J. J.; Brothers, E. N.; Kudin, K. N.; Staroverov, V. N.; Keith, T. A.; Kobayashi, R.; Normand, J.; Raghavachari, K.; Rendell, A. P.; Burant, J. C.; Iyengar, S. S.; Tomasi, J.; Cossi, M.; Millam, J. M.; Klene, M.; Adamo, C.; Cammi, R.; Ochterski, J. W.; Martin, R. L.; Morokuma, K.; Farkas, Ö.; Foresman, J. B.; Fox, D. J. Gaussian, Inc., Wallingford, CT, 2016.
- (23) Zhao, Y. & Truhlar, D. G. The M06 suite of density functionals for main group thermochemistry, thermochemical kinetics, noncovalent interactions, excited states, and transition elements: two new functionals and systematic testing of four M06-class functionals and 12 other functionals. *Theor. Chem. Acc.* **2008**, *120*, 215–241
